# Supplementary material for: Modeling the implementation of population-level isoniazid preventive therapy for tuberculosis control in a high HIV-prevalence setting
Source: PubMed Central journal article supplement — AIDS. 2018 Sep 19;32(15):2129–40. doi: 10.1097/QAD.0000000000001959 (PMC6150186; doi:10.1097/qad.0000000000001959), 2018-09-19
Supplement: aids-32-2129-s001.pdf [file aids-32-2129-s001.pdf]

## Supplementary Materials

### ***Table S1: Parameters***

Parameters used in our model.

### ***Table S2: Key calibration targets and calibration values achieved***

Calibration targets used in our model.

### ***Figure S1: Total population size***

This figure shows the total population size over the simulated period. Bars indicate target calibration range.

### ***Figure S2: Sensitivity analysis of TB incidence to TB transmission rate***

This figure shows sensitivity of active TB disease incidence to the rate at which TB infection is transmitted.

### ***Figure S3: Sensitivity analysis of TB incidence to recovery rate on IPT***

This figure shows sensitivity of TB incidence to the rate at which individuals with latent TB placed on IPT are cured of TB infection and return to the susceptible state.

### ***Figure S4: Sensitivity analysis of TB incidence to TB activation rate in HIV-positive individuals***

This figure shows sensitivity of TB incidence to the rate at which HIV-positive individuals with latent TB progress to active TB disease.

### ***Figure S5: Sensitivity analysis to the rate at which individuals who have recovered from TB cease IPT treatment***

This figure shows sensitivity of TB incidence to the rate at which individuals on IPT who have been cured of latent TB infection and returned to susceptible status stop IPT treatment.

### ***Figure S6: Effects of IPT on TB disease indicators***

Plots of the effects of IPT on TB and HIV indicators. Bars indicate calibration target ranges. The baseline IPT case is shown in green, 50% IPT coverage in the blue intervention line, and 90% IPT coverage in the purple intervention line.

### ***Figure S7: Sensitivity analysis to the rate of HIV infection***

This figure shows sensitivity of TB incidence to the rate of HIV infection.

### ***Figure S8: Sensitivity analysis to birthrate***

This figure shows sensitivity analysis to the total birth rate.

### ***Figure S9: Effects to expanding IPT to adults***

This figure describes the effects of expanding IPT coverage to the broader adult population. Bars indicate calibration target ranges. The baseline IPT case is shown in green, 50% IPT coverage in blue, and 90% IPT coverage in purple.

***Figure S10: Effects of general adolescent IPT on TB incidence in HIV-positive population***

This figure shows the impact of adolescent IPT on TB incidence in the HIV-positive population.

***Figure S11: Effects of general adolescent IPT on TB incidence in HIV-positive adult population***

This figure shows the impact of adolescent IPT on TB incidence in the adult HIV-positive population.

***Figure S12: Conditions under which TB incidence could increase as a result of expanded IPT***

This figure shows a parameter set in which it could be possible for IPT to increase TB incidence.

***Table S3: Summary of one-way sensitivities of TB incidence in 2032***

These tables summarize the numerical values of TB incidence in year 2032 of the model under key sensitivity analyses.

***Figure S13: Impact of IPT access by demographic group***

This figure compares the impact on general population TB incidence of IPT access in A) adolescents only, B) adults only, C) both adolescents and adults.

***Figure S14: Multiple-way sensitivity analyses***

This figure shows multi-way sensitivity analyses between key variables.

***Figure S15: Effects of IPT in adolescents on various demographic groups***

This figure shows the impact of IPT access in adolescents on TB incidence in A) adolescents, and B) adults

***Equations***

The equations of the model are included here.

**Table S1: Parameters**

TB Parameters<sup>1</sup>

| Parameter                                   | Description                                                                                            | Calibrated Value | Source                                                   |
|---------------------------------------------|--------------------------------------------------------------------------------------------------------|------------------|----------------------------------------------------------|
| Transmission Rate                           | Rate of TB transmission                                                                                | 0.0000004        | Sensitivity Analysis                                     |
| Latency Rate Upon Infection in HIV-         | Rate at which HIV- individuals infected with TB remain latently, rather than actively, infected        | 0.9              | Abu-Raddad et al. 2009 <sup>1*</sup>                     |
| Latency Rate Upon Infection in HIV+         | Rate at which HIV+ individuals infected with TB remain latently, rather than actively, infected        | 0.5              | Lawn et al. 2009 <sup>2</sup>                            |
| Latency Rate Upon Infection in HIV+ on ART  | Rate at which HIV+ individuals on ART infected with TB remain latently, rather than actively, infected | 0.9              | Abu-Raddad et al. 2009 <sup>1*</sup>                     |
| TB Activation Rate in HIV-                  | Rate at which HIV- individuals experience latent TB activation                                         | 0.005            | Horsburgh et al. 2004 <sup>3</sup>                       |
| TB Activation Rate in HIV+                  | Rate at which HIV+ individuals experience latent TB activation                                         | 0.09             | Sensitivity Analysis                                     |
| TB Activation Rate in ART                   | Rate at which HIV+ individuals on ART experience latent TB activation                                  | 0.005            | Horsburgh et al. 2004 <sup>3</sup>                       |
| TB Treatment Rate                           | Rate at which TB is treated with combination therapy                                                   | 0.9              | WHO 2013 <sup>4</sup>                                    |
| Recovery Rate for Combination Therapy       | Rate at which individuals with TB recover when treated with combination therapy                        | 0.9              | WHO 2013 <sup>4</sup> , Bacaer et al. 2008 <sup>5*</sup> |
| Return to Latency After Combination Therapy | Rate at which individuals receiving combination therapy for active TB return to latency                | 0.08             | Suen et al. 2014 <sup>6*</sup>                           |
| Recovery Rate for IPT                       | Rate at which individuals recover on IPT                                                               | 0.47             | Zelner et al. 2014 <sup>7</sup>                          |
| TB Activation Rate on IPT for HIV-          | Rate at which HIV- individuals latently infected with TB experience TB activation                      | 0.0001           | Houben et al. 2014 <sup>8*</sup>                         |

<sup>1</sup> With regard to the units of the TB and HIV parameters, each of these parameters is reported as the fraction of the population within a given compartment flowing out of that compartment into another specified by the model diagram per unit time

\*Parameter taken as either an input or an output from a modeling publication

|                                              |                                                                                                                            |              |                                                                                                    |
|----------------------------------------------|----------------------------------------------------------------------------------------------------------------------------|--------------|----------------------------------------------------------------------------------------------------|
| TB Activation Rate on IPT for HIV+           | Rate at which HIV+ individuals latently infected with TB experience TB activation                                          | 0.0001       | Houben et al. 2014 <sup>8*</sup> , Selwyn et al. 1992 <sup>9</sup> , Lin et al. 2010 <sup>10</sup> |
| Non-Cure on Combination Therapy              | Rate at which individuals who have received combination therapy are not cured                                              | 0.02         | Suen et al. 2014 <sup>6*</sup>                                                                     |
| Natural Cure Rate                            | Rate at which individuals with active TB experience spontaneous resolution to latent TB                                    | 0.1          | Tiemersma et al. 2011 <sup>11</sup>                                                                |
| Incorrect Diagnosis Rate in HIV-             | Rate at which HIV- individuals who are actively infected with TB are incorrectly diagnosed as latently infected            | 0.00001      | Boehme et al. 2011 <sup>12</sup>                                                                   |
| Incorrect Diagnosis Rate in HIV+             | Rate at which HIV+ individuals not on ART who are actively infected with TB are incorrectly diagnosed as latently infected | 0.0001       | Boehme et al. 2011 <sup>12</sup>                                                                   |
| Incorrect Diagnosis Rate in HIV+ on ART      | Rate at which HIV+ individuals on ART who are actively infected with TB are incorrectly diagnosed as latently infected     | 0.00001      | Boehme et al. 2011 <sup>12</sup>                                                                   |
| Correct Move from IPT to Combination Therapy | Rate at which individuals who had incorrectly been placed on combination therapy are redirected to IPT                     | 0.9          | Boehme et al. 2011 <sup>12</sup>                                                                   |
| Re-infection adjustment                      | Factor to adjust for the possibility of re-infection with TB following treatment and cure                                  | 0.21         | Andrews et al. 2012 <sup>13*</sup>                                                                 |
| IPT Access Rate                              | Rate at which individuals latently infected with TB are placed on IPT                                                      | 0.05/0.5/0.9 | Sensitivity Analysis                                                                               |
| Default rate on IPT                          | Rate at which individuals on IPT default                                                                                   | 0            | Sensitivity Analysis                                                                               |
| Rate of ceasing IPT                          | Rate at which individuals on IPT stop treatment                                                                            | 0            | Sensitivity Analysis                                                                               |

## HIV Parameters<sup>2</sup>

| Parameter                    | Description                                                                                            | Value        | Source                            |
|------------------------------|--------------------------------------------------------------------------------------------------------|--------------|-----------------------------------|
| HIV Infection in Adolescents | Rate at which adolescents are infected with HIV                                                        | 0.0000000039 | Auvert et al. 2005 <sup>14</sup>  |
| HIV Infection in Adults      | Rate at which adults are infected with HIV                                                             | 0.0000000039 | Calibration                       |
| Progression of CD4 Count     | Rate at which individuals infected with HIV progress to ART eligibility (experience CD4 count decline) | 0.13         | Mellors et al. 1997 <sup>15</sup> |
| Access to ART                | Rate at which eligible HIV+ individuals are placed on ART                                              | 0.02/ 0.1    | Calibration                       |
| Recovery of CD4 Count on ART | Rate at which HIV+ individuals on ART experience CD4 count recovery                                    | 0.01         | Calibration                       |

## Demographic Parameters<sup>3</sup>

| Parameter                                      | Description                                                                 | Value |
|------------------------------------------------|-----------------------------------------------------------------------------|-------|
| Child Natural Mortality                        | Mortality rate among children not infected with TB or HIV                   | 0.001 |
| Adolescent Natural Mortality                   | Mortality rate among adolescents not infected with TB or HIV                | 0.009 |
| Adult Natural Mortality                        | Mortality rate among adults not infected with TB or HIV                     | 0.02  |
| HIV+ Pre-ART Adolescent Mortality              | Mortality rate among adolescents who are HIV+ and not yet eligible for ART  | 0.02  |
| HIV+ Pre-ART Adult Mortality                   | Mortality rate among adults who are HIV+ and not yet eligible for ART       | 0.03  |
| HIV+ ART-Eligible Adolescent Mortality         | Mortality rate among adolescents who are HIV+ and eligible for ART          | 0.05  |
| HIV+ ART-Eligible Adult Mortality              | Mortality rate among adults who are HIV+ and eligible for ART               | 0.05  |
| HIV+ on ART Low CD4 Count Adolescent Mortality | Mortality rate among adolescents who are HIV+ and on ART with low CD4 count | 0.09  |

<sup>2</sup> With regard to the units of the TB and HIV parameters, each parameter is reported as the fraction of the population within a given compartment flowing out of that compartment into another specified by the model diagram per unit time

<sup>3</sup> All demographic parameters were generated via calibration to the population structure

|                                                 |                                                                                                     |        |
|-------------------------------------------------|-----------------------------------------------------------------------------------------------------|--------|
| HIV+ on ART Low CD4 Count Adult Mortality       | Mortality rate among adults who are HIV+ and on ART with low CD4 count                              | 0.02   |
| HIV+ on ART High CD4 Count Adolescent Mortality | Mortality rate among adolescents who are HIV+ and on ART with high CD4 count                        | 0.09   |
| HIV+ on ART High CD4 Count Adult Mortality      | Mortality rate among adults who are HIV+ and on ART with high CD4 count                             | 0.02   |
| TB Adolescent Mortality                         | Mortality rate among adolescents who are infected with TB, and are HIV-                             | 0.058  |
| TB Adult Mortality                              | Mortality rate among adults who are infected with TB, and are HIV-                                  | 0.068  |
| TB & HIV+ Pre-ART Adolescent Mortality          | Mortality rate among adolescents who are infected with TB, and are HIV+, not yet eligible for ART   | 0.12   |
| TB & HIV+ Pre-ART Adult Mortality               | Mortality rate among adults who are infected with TB, and are HIV+, not yet eligible for ART        | 0.23   |
| TB & HIV+ ART-Eligible Adolescent Mortality     | Mortality rate among adolescents who are infected with TB, and are HIV+, and eligible for ART       | 0.17   |
| TB & HIV+ ART-Eligible Adult Mortality          | Mortality rate among adults who are infected with TB, and are HIV+, and eligible for ART            | 0.3    |
| TB & HIV+ Low CD4 Count Adolescent Mortality    | Mortality rate among adolescents who are infected with TB, and are HIV+, on ART with low CD4 count  | 0.07   |
| TB & HIV+ Low CD4 Count Adult Mortality         | Mortality rate among adults who are infected with TB, and are HIV+, on ART with low CD4 count       | 0.1    |
| TB & HIV+ High CD4 Count Adolescent Mortality   | Mortality rate among adolescents who are infected with TB, and are HIV+, on ART with high CD4 count | 0.062  |
| TB & HIV+ High CD4 Count Adult Mortality        | Mortality rate among adults who are infected with TB, and are HIV+, on ART with high CD4 count      | 0.072  |
| Births                                          | Birth rate                                                                                          | 0.03   |
| Aging Rate from Children to Adolescents         | Rate at which children age into the adolescent group                                                | 0.0769 |
| Aging Rate from Adolescents to Adults           | Rate at which adolescents age into the adult group                                                  | 0.2    |

\*Parameter is reported as an input or output from a modeling publication

Note: All parameters subject to adjustment for calibration

**Table S2: Key calibration targets and calibration values achieved**

| Calibration Indicator              | Target Value | Calibration Value Achieved | Source                                                               |
|------------------------------------|--------------|----------------------------|----------------------------------------------------------------------|
| Incidence                          | 1117         | 1113.13                    | Global TB Report                                                     |
| Mortality                          | 220          | 268.33                     | Global TB Report                                                     |
| HIV Prevalence in Adult Population | 15           | 14.99                      | South African National HIV Incidence, Prevalence and Behavior Survey |
| ART Coverage among HIV+            | 31           | 30.91                      | South African National HIV Incidence, Prevalence and Behavior Survey |
| HIV-Positivity in TB Deaths        | 74           | 40.82                      | Global TB Report                                                     |

**Table S3: Summary of one-way sensitivities of TB incidence in 2032**

|                                                                     |                          |           |           |           |           |           |
|---------------------------------------------------------------------|--------------------------|-----------|-----------|-----------|-----------|-----------|
| <b>Sensitivity Analysis of TB Incidence to TB Transmission Rate</b> | <b>Transmission rate</b> | 0.0000001 | 0.0000002 | 0.0000003 | 0.0000005 | 0.0000006 |
|                                                                     | <b>TB Incidence</b>      | 1221      | 956       | 820       | 847       | 894       |
| <b>Sensitivity Analysis of TB Incidence to TB Transmission Rate</b> | <b>Transmission rate</b> | 0.0000007 | 0.0000008 | 0.0000009 | 0.000001  | 0.0000015 |
|                                                                     | <b>TB Incidence</b>      | 948       | 1008      | 1074      | 1148      | 1640      |

|                                                                     |                      |           |          |          |          |
|---------------------------------------------------------------------|----------------------|-----------|----------|----------|----------|
| <b>Sensitivity Analysis of TB Incidence to Recovery Rate on IPT</b> | <b>Recovery rate</b> | 0.1       | 0.3      | 0.6      | 0.9      |
|                                                                     | <b>TB Incidence</b>  | 1036.1274 | 838.5098 | 807.5356 | 799.5961 |

|                                                                                               |                                                       |          |          |          |          |          |
|-----------------------------------------------------------------------------------------------|-------------------------------------------------------|----------|----------|----------|----------|----------|
| <b>Sensitivity Analysis of TB Incidence to TB Activation Rate in HIV-positive individuals</b> | <b>TB Activation rate in HIV-positive individuals</b> | 0.005    | 0.05     | 0.2      | 0.5      | 0.9      |
|                                                                                               | <b>TB Incidence</b>                                   | 726.4634 | 793.7456 | 822.9659 | 812.6559 | 808.0295 |

|                                                                                                             |                            |           |           |           |
|-------------------------------------------------------------------------------------------------------------|----------------------------|-----------|-----------|-----------|
| <b>Sensitivity analysis to the rate at which individuals who have recovered from TB cease IPT treatment</b> | <b>Rate of ceasing IPT</b> | 0.05      | 0.1       | 0.15      |
|                                                                                                             | <b>TB Incidence</b>        | 1191.5818 | 1462.8285 | 1679.0699 |



|                                                          |                                  |       |      |      |      |      |      |         |
|----------------------------------------------------------|----------------------------------|-------|------|------|------|------|------|---------|
| <b>Sensitivity analysis to the rate of HIV infection</b> | <b><i>HIV Infection rate</i></b> | 1E-10 | 1E-9 | 2E-9 | 3E-9 | 4E-9 | 5E-9 | 5.5E-09 |
|                                                          | <b><i>TB Incidence</i></b>       | 707   | 699  | 694  | 724  | 829  | 1002 | 1090    |

|                                          |                            |          |          |         |           |
|------------------------------------------|----------------------------|----------|----------|---------|-----------|
| <b>Sensitivity analysis to birthrate</b> | <b><i>Birth rate</i></b>   | 0.001    | 0.01     | 0.02    | 0.04      |
|                                          | <b><i>TB Incidence</i></b> | 207.5082 | 338.2676 | 509.442 | 1559.0206 |

|                                           |                            |          |
|-------------------------------------------|----------------------------|----------|
| <b>Effects to Expanding IPT to adults</b> | <b><i>TB Incidence</i></b> | 815.0284 |
|-------------------------------------------|----------------------------|----------|

*Figure S1: Total population size*

Total Population Size

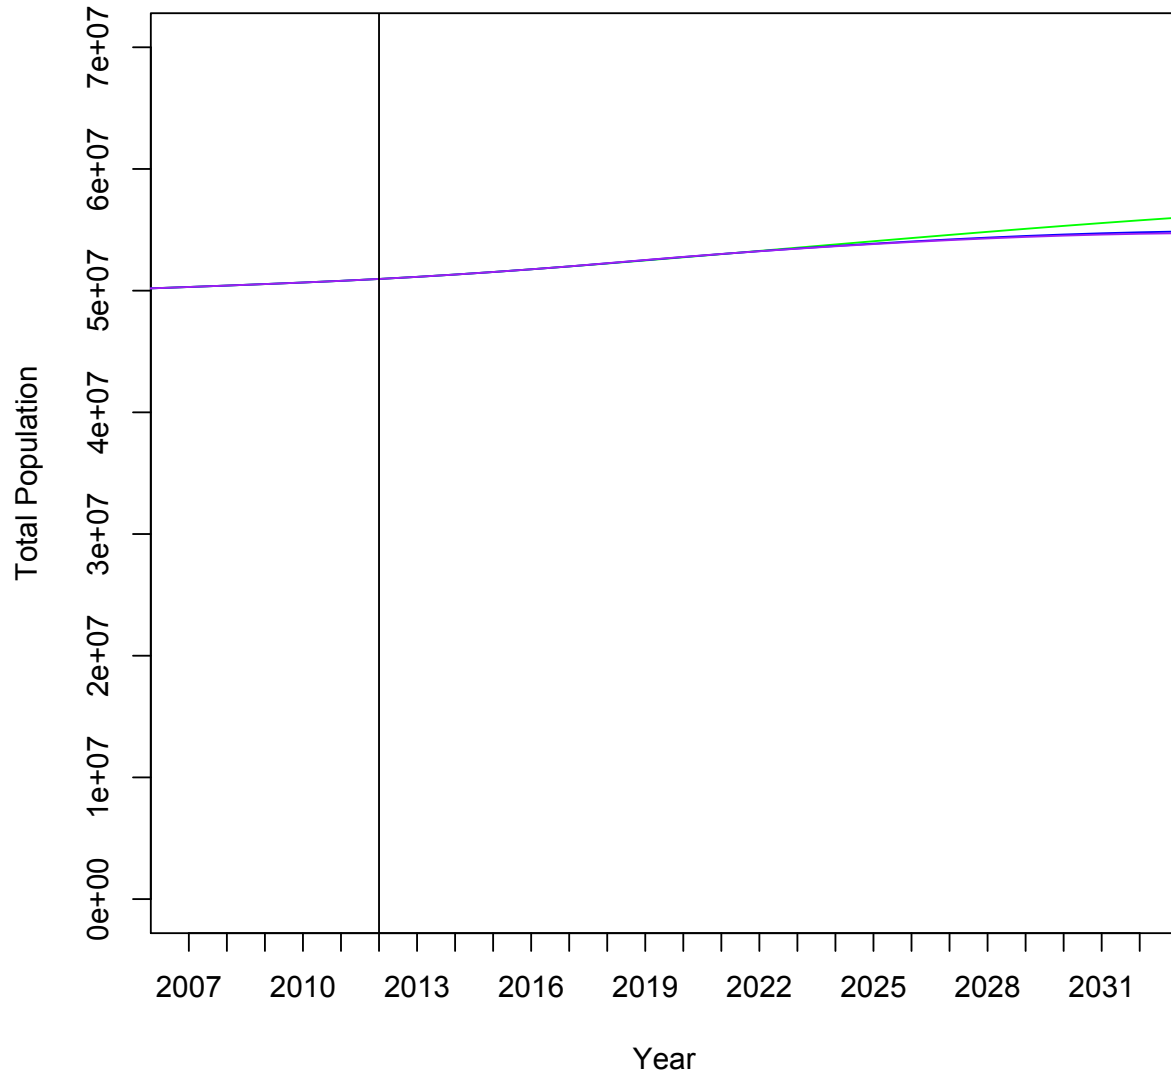

*Figure S2: Sensitivity analysis of TB incidence to TB transmission rate*

Transmission Rate of 0.000001

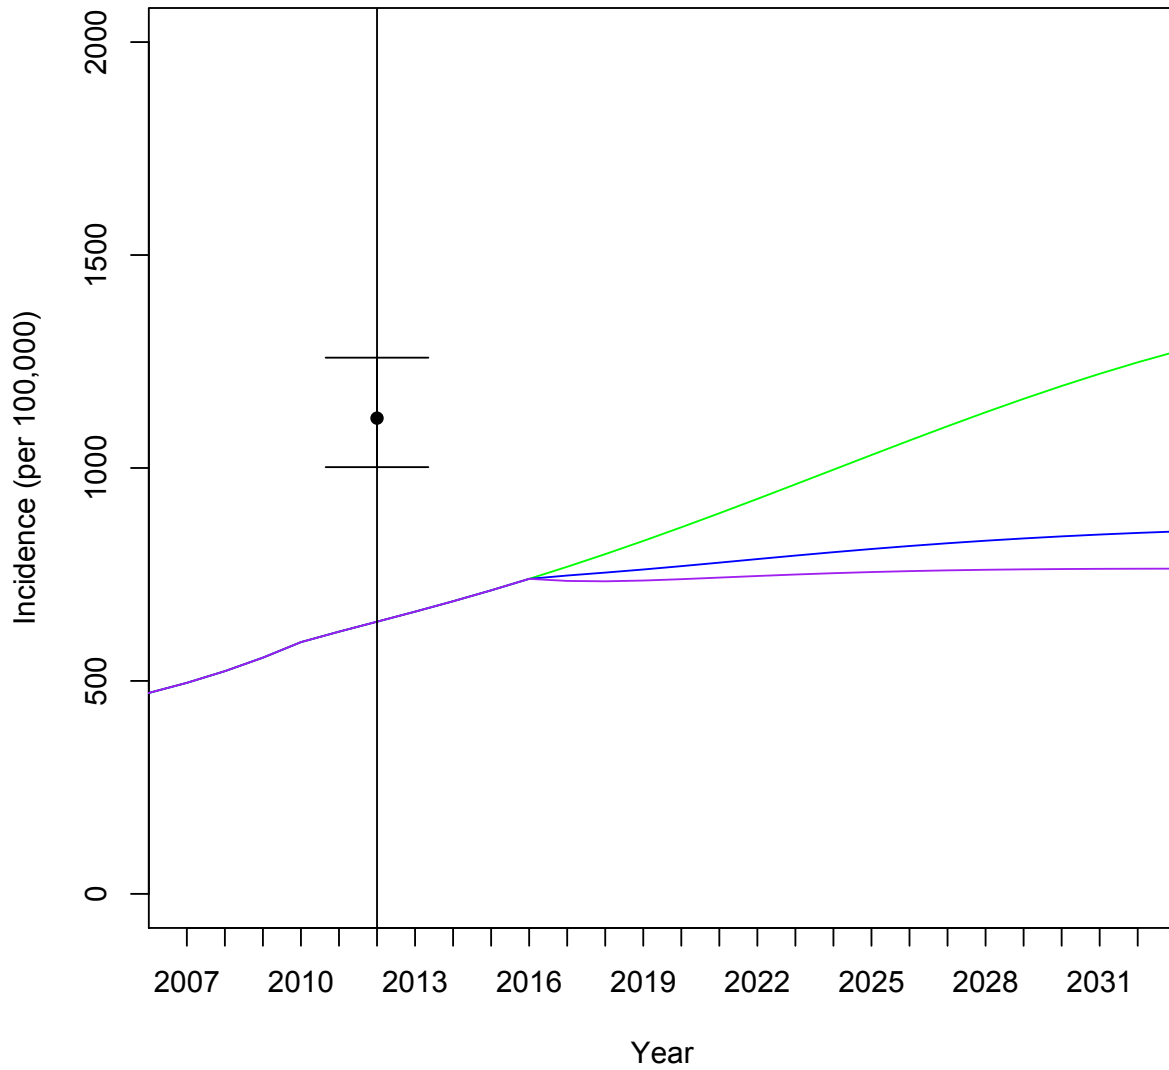

Transmission Rate of 0.0000002

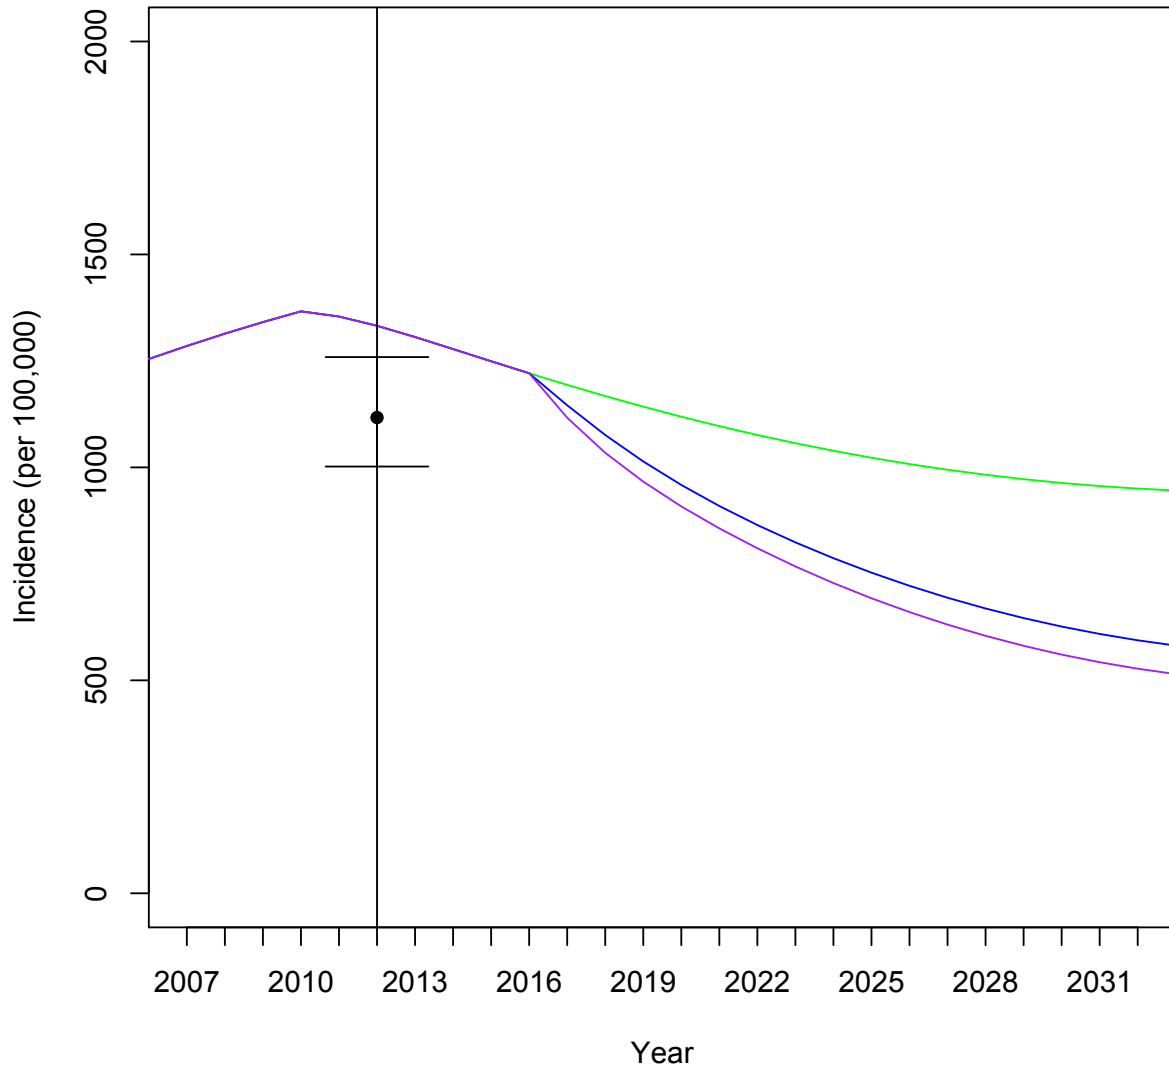

Transmission Rate of 0.0000003

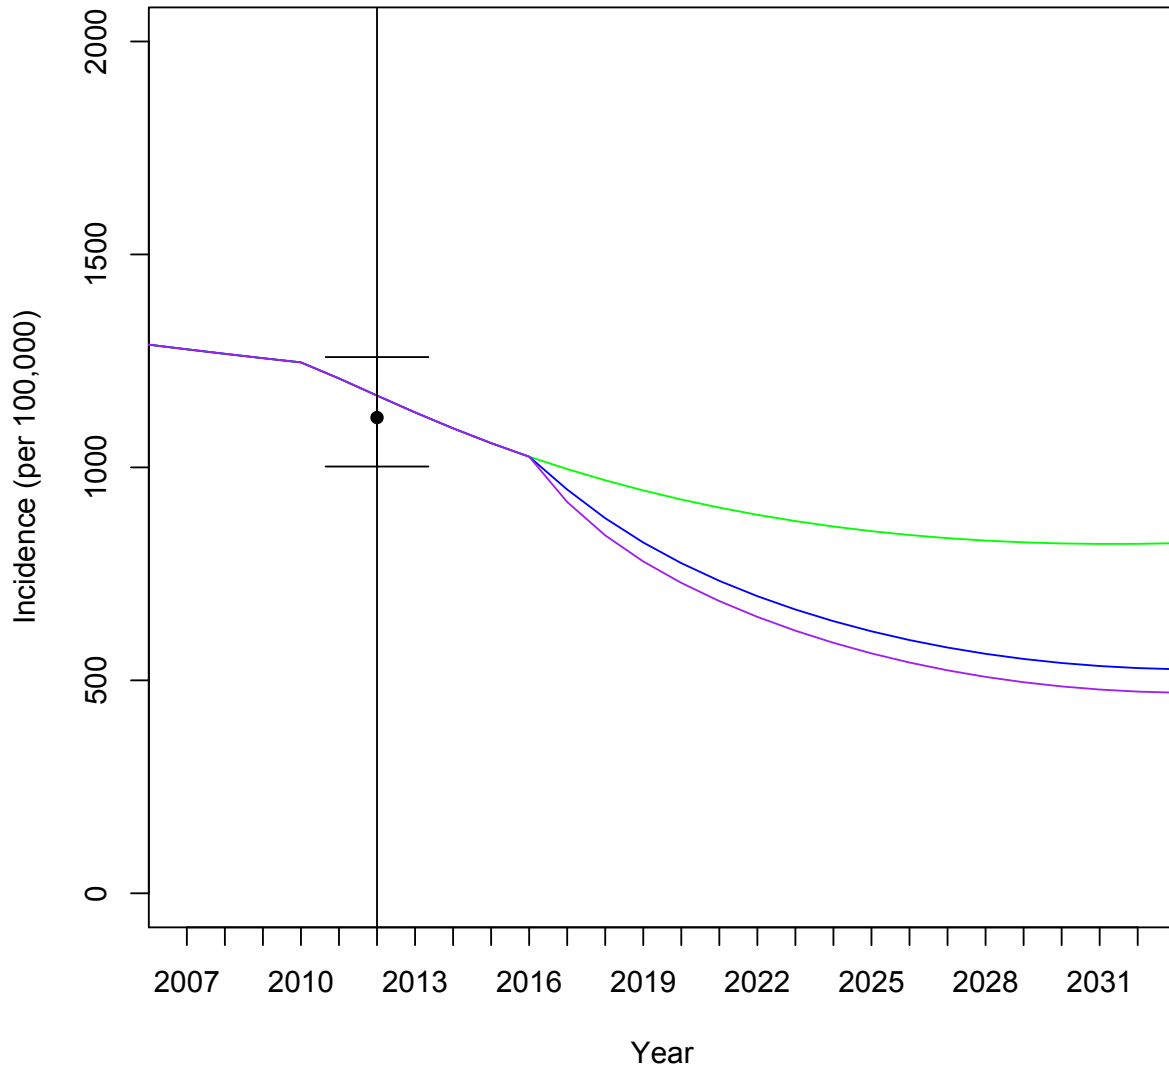

Transmission Rate of 0.000005

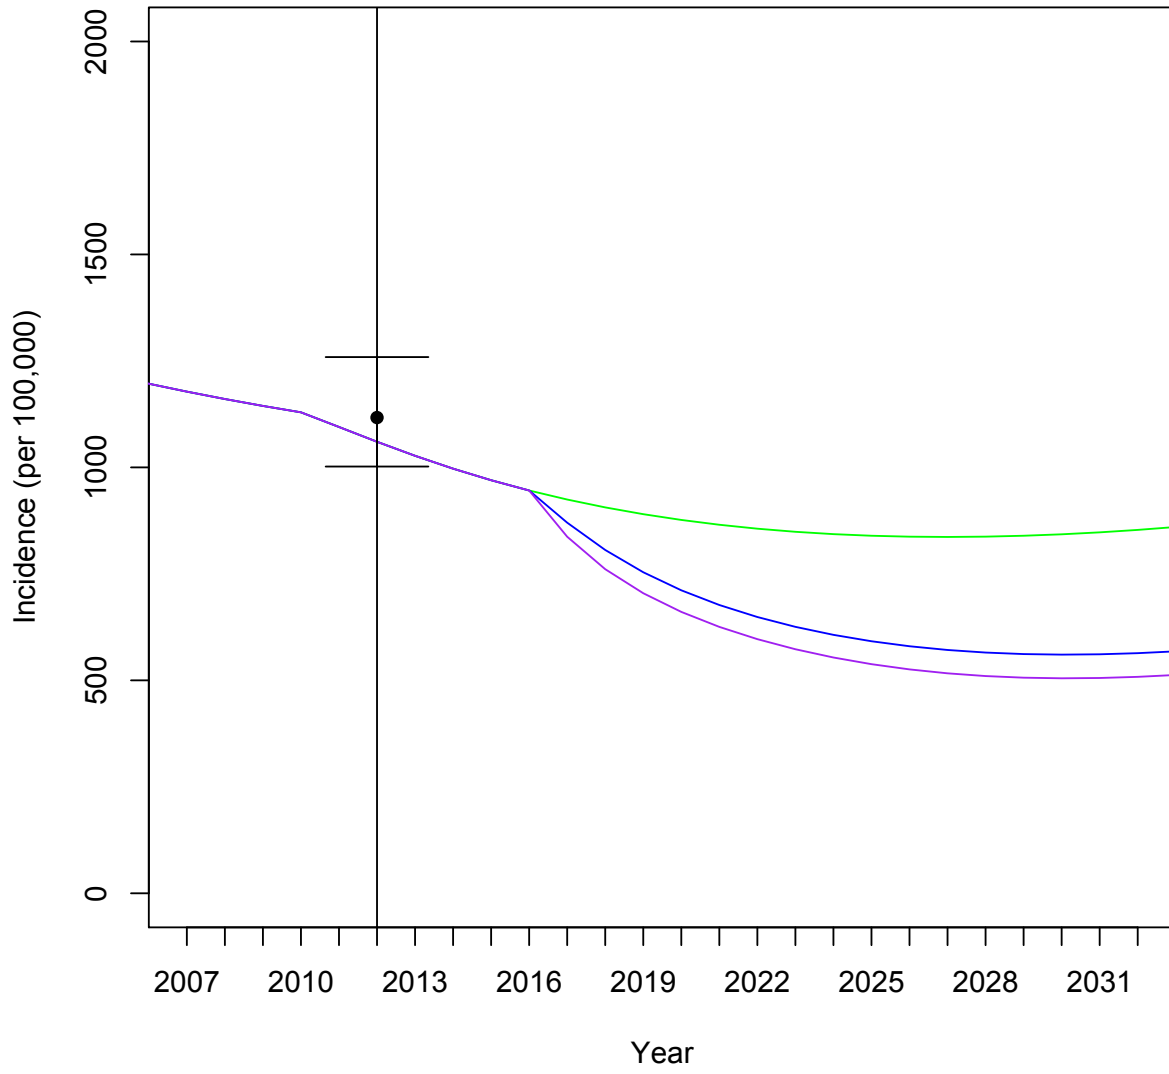

Transmission Rate of 0.0000006

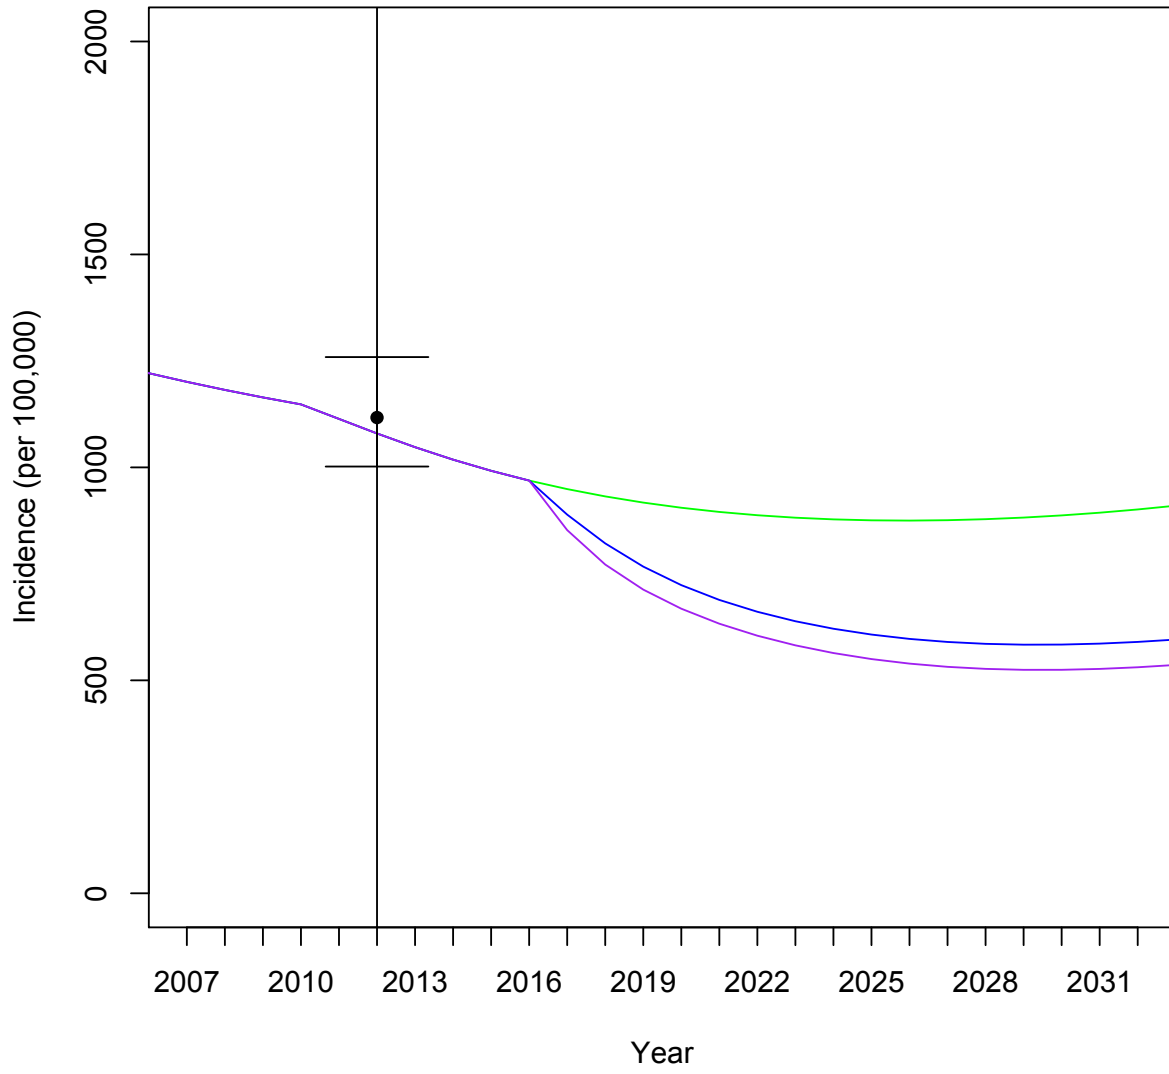

Transmission Rate of 0.0000007

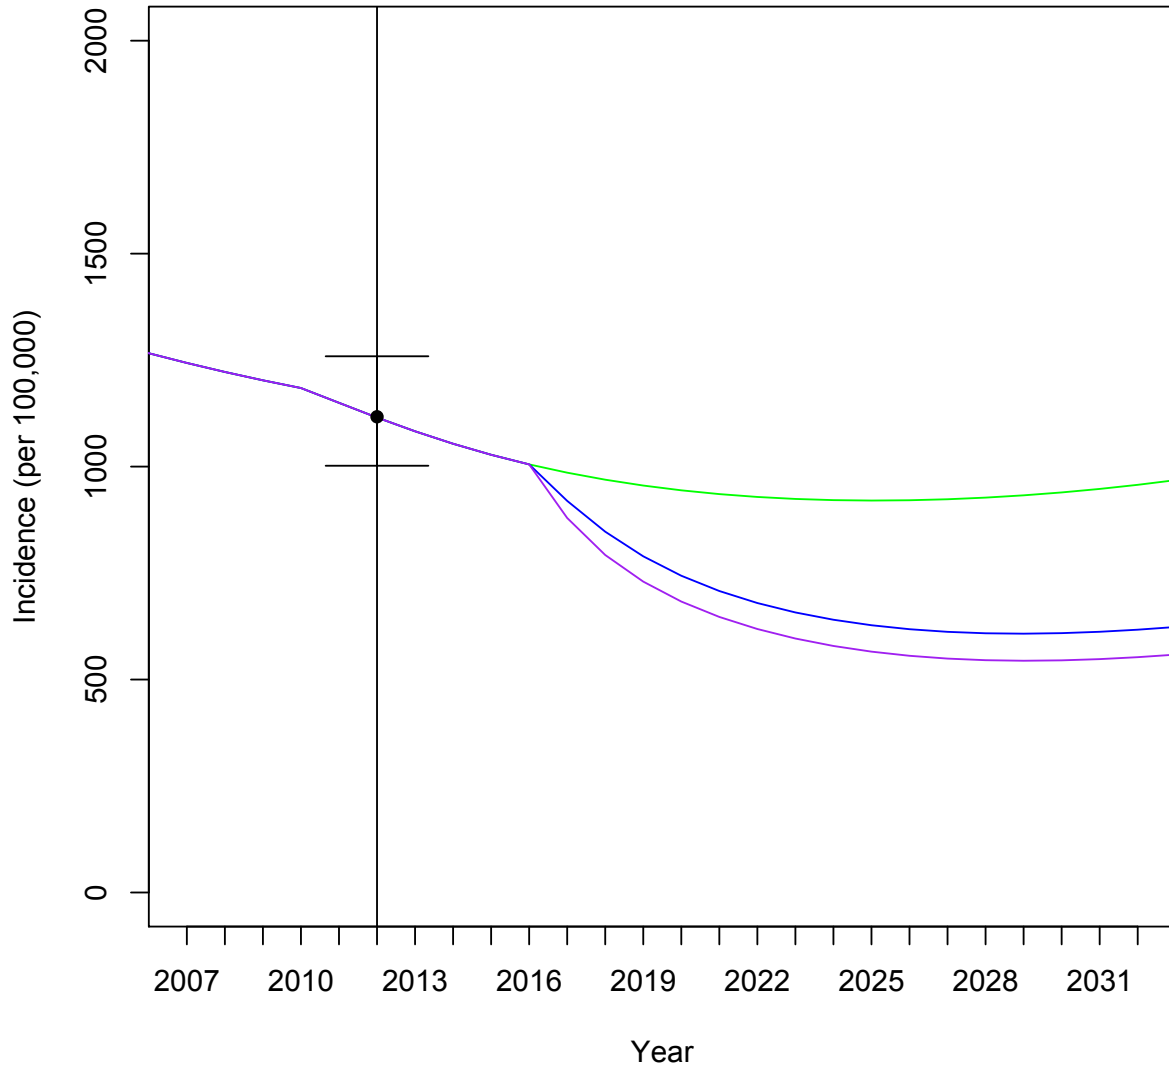



Transmission Rate of 0.0000008

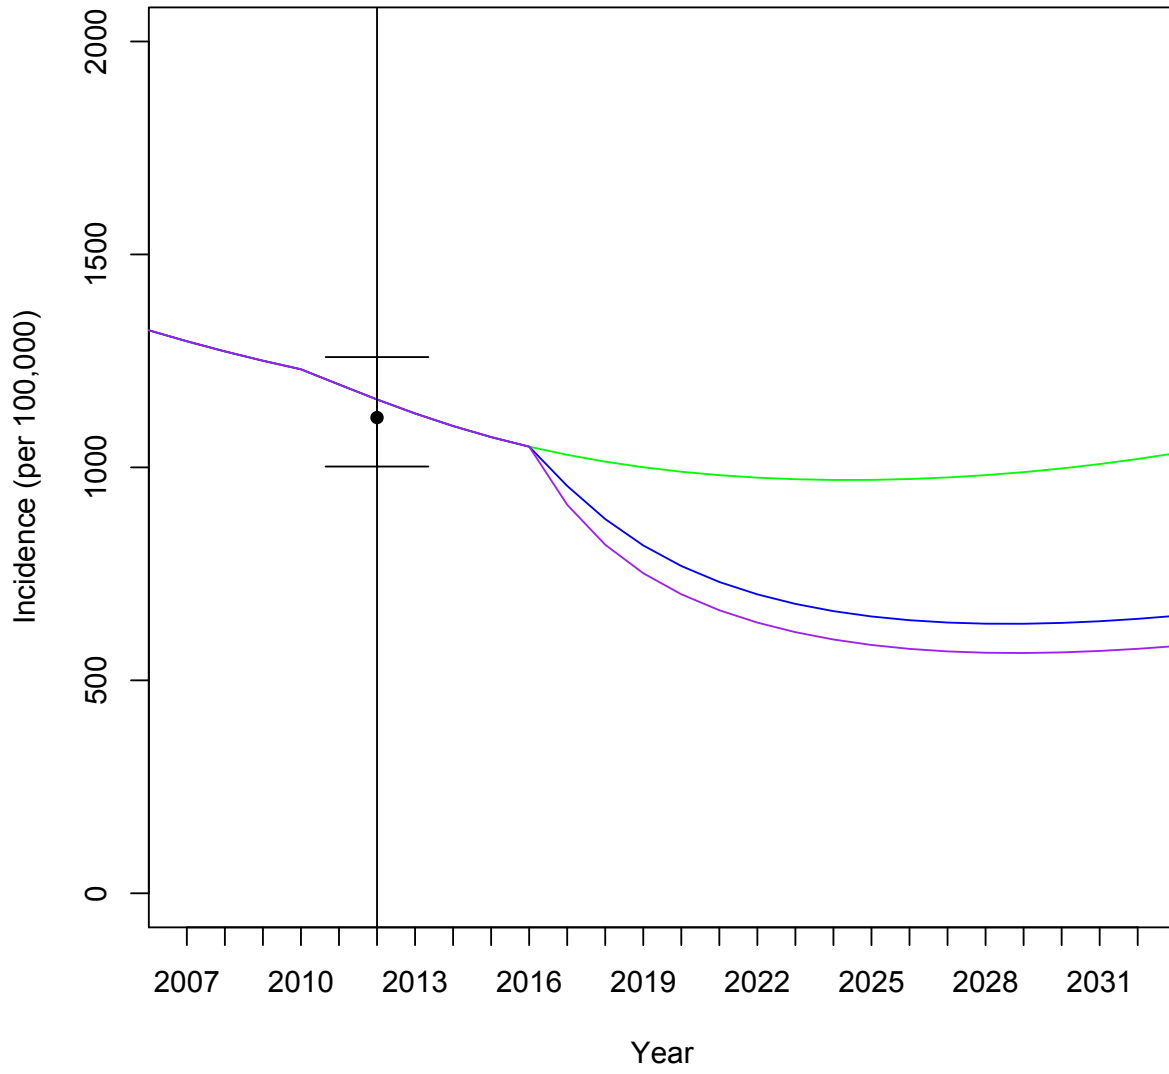

Transmission Rate of 0.000009

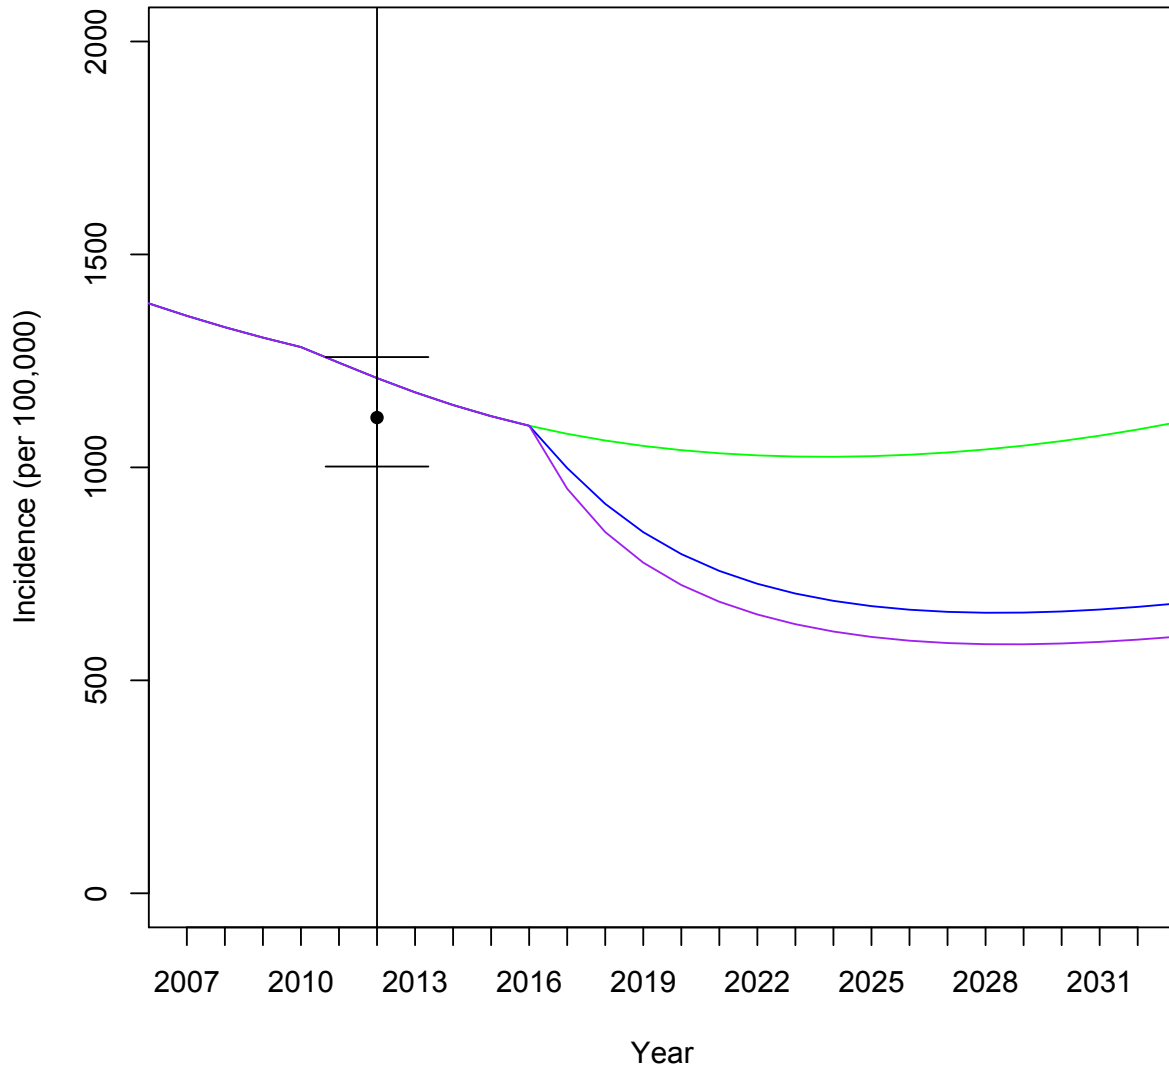

Transmission Rate of 0.000001

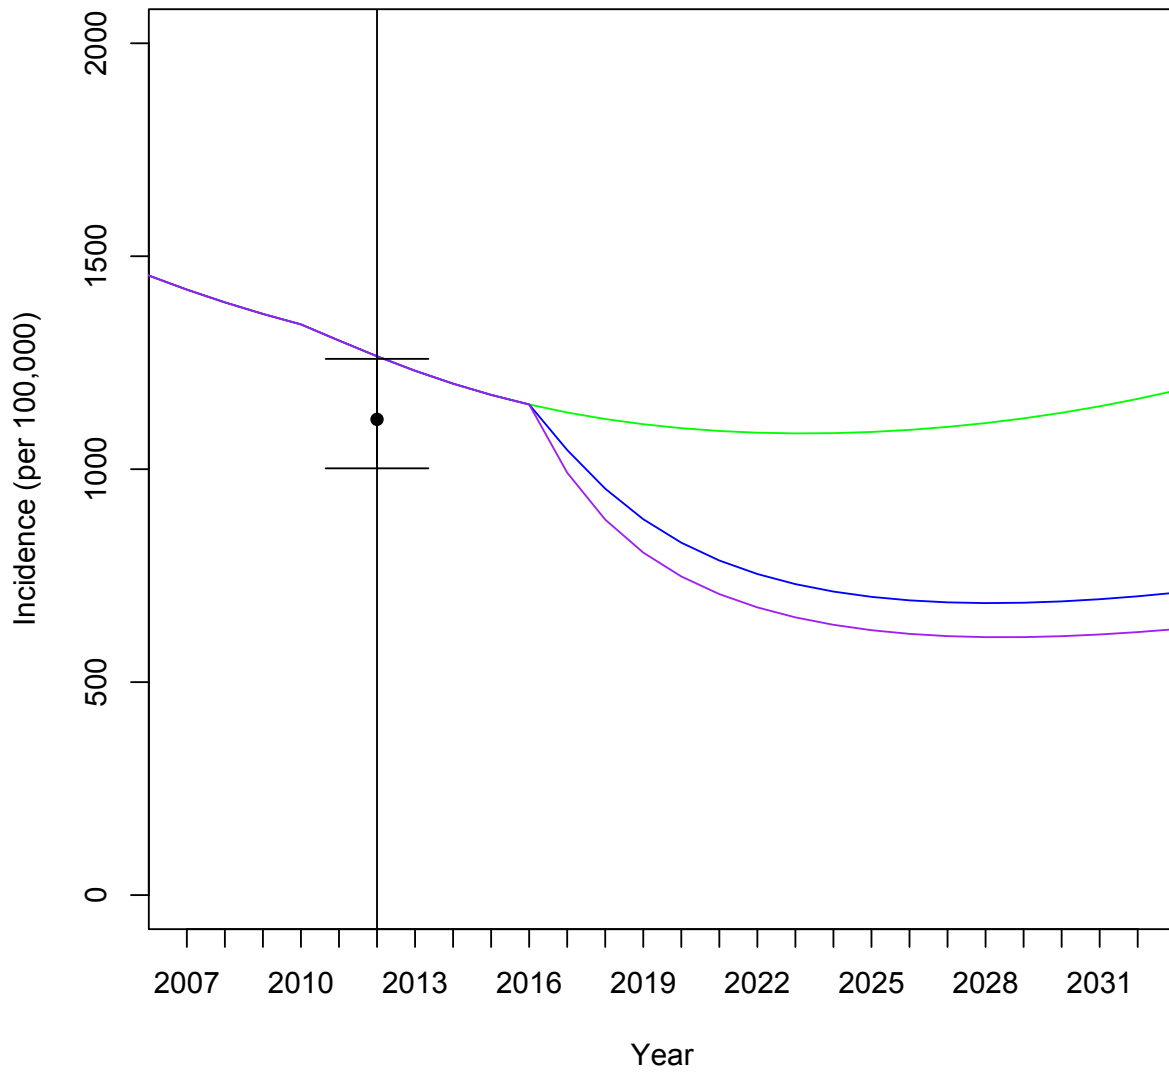

Transmission Rate of 0.0000015

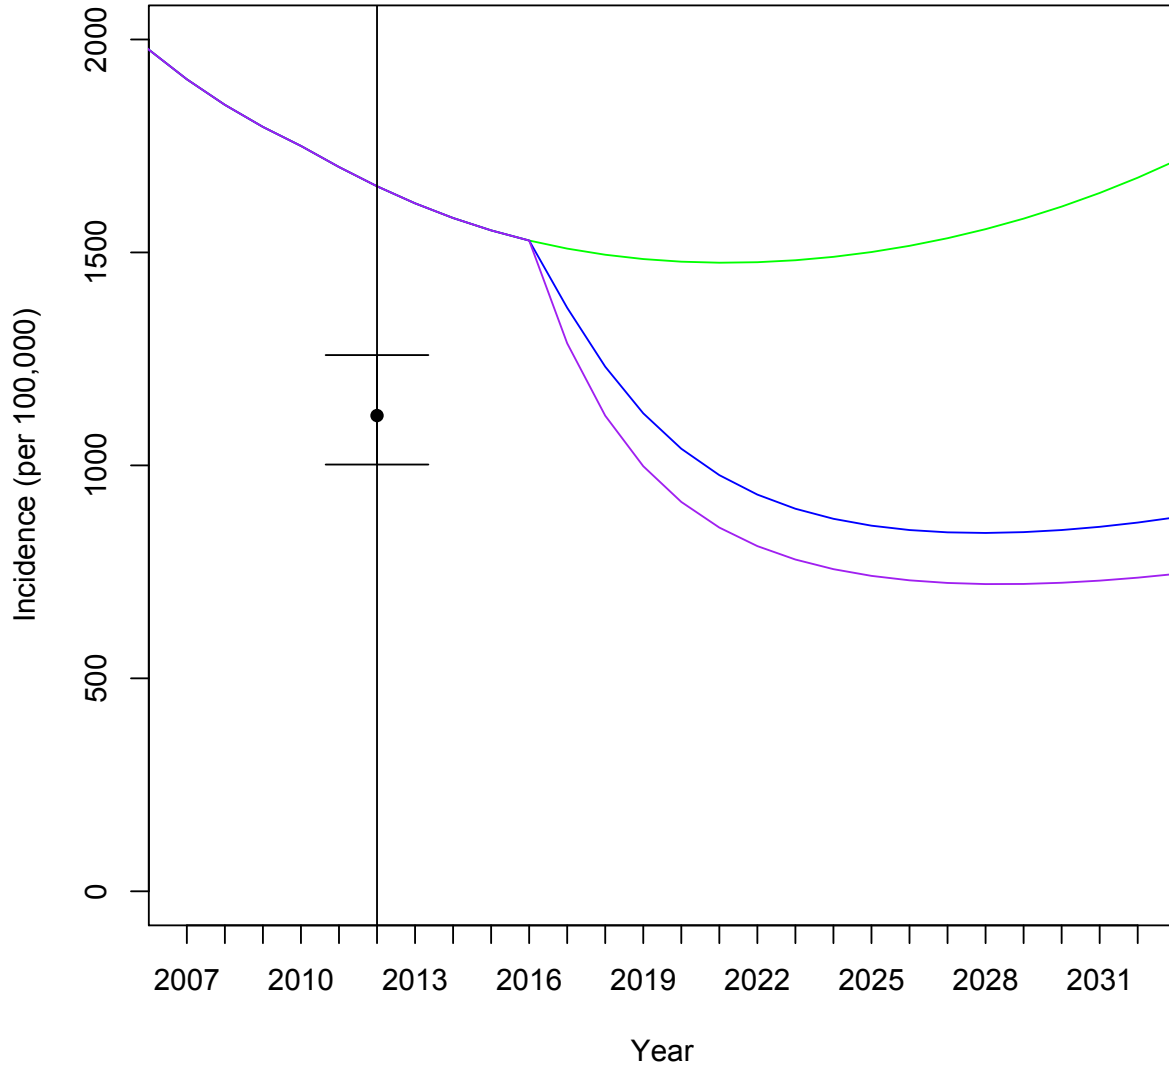

*Figure S3: Sensitivity analysis of TB incidence to recovery rate on IPT*

IPT Recovery Rate of 0.1

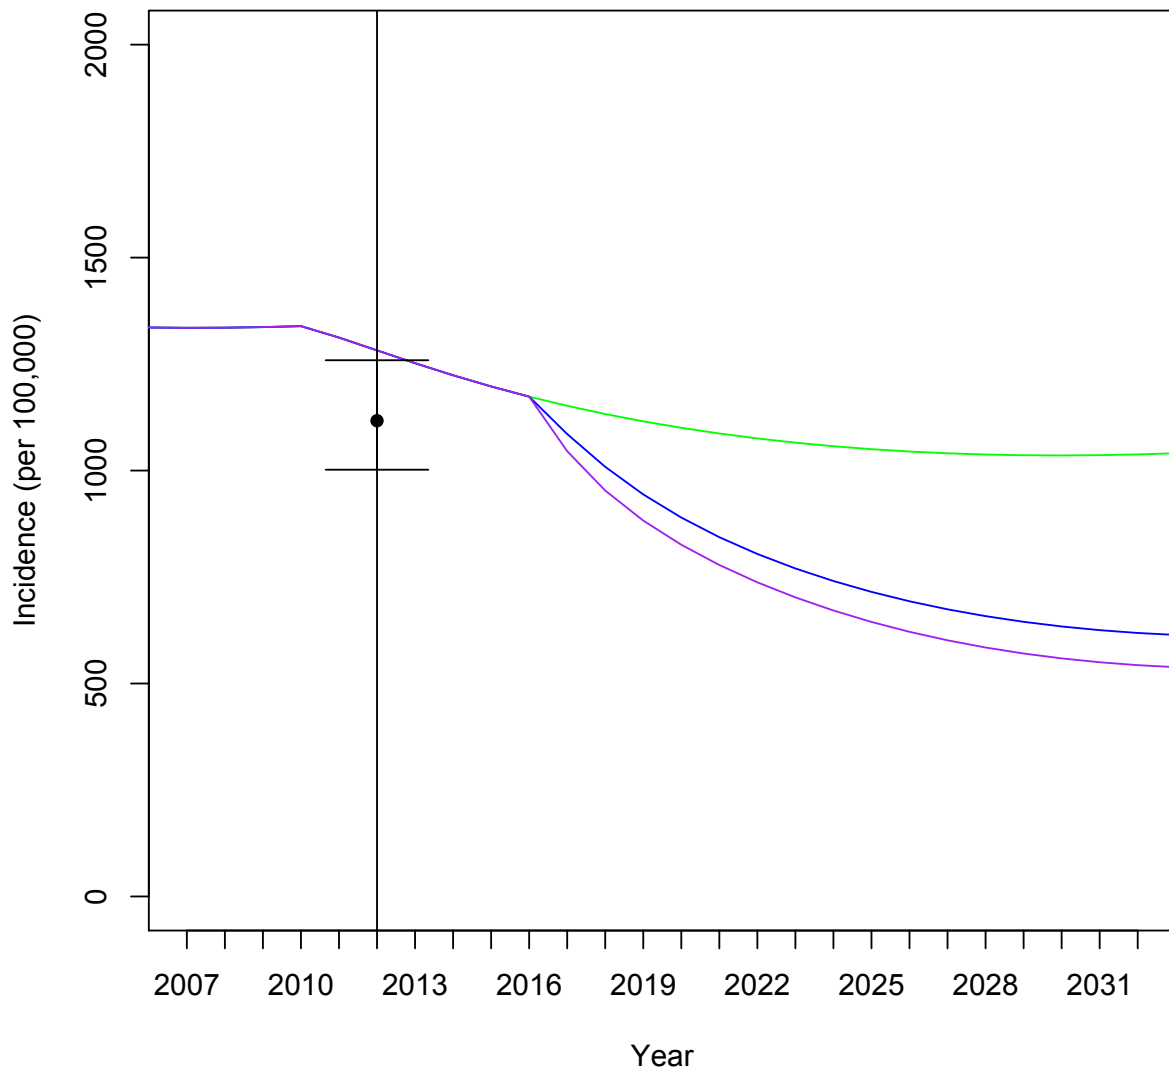

IPT Recovery Rate of 0.3

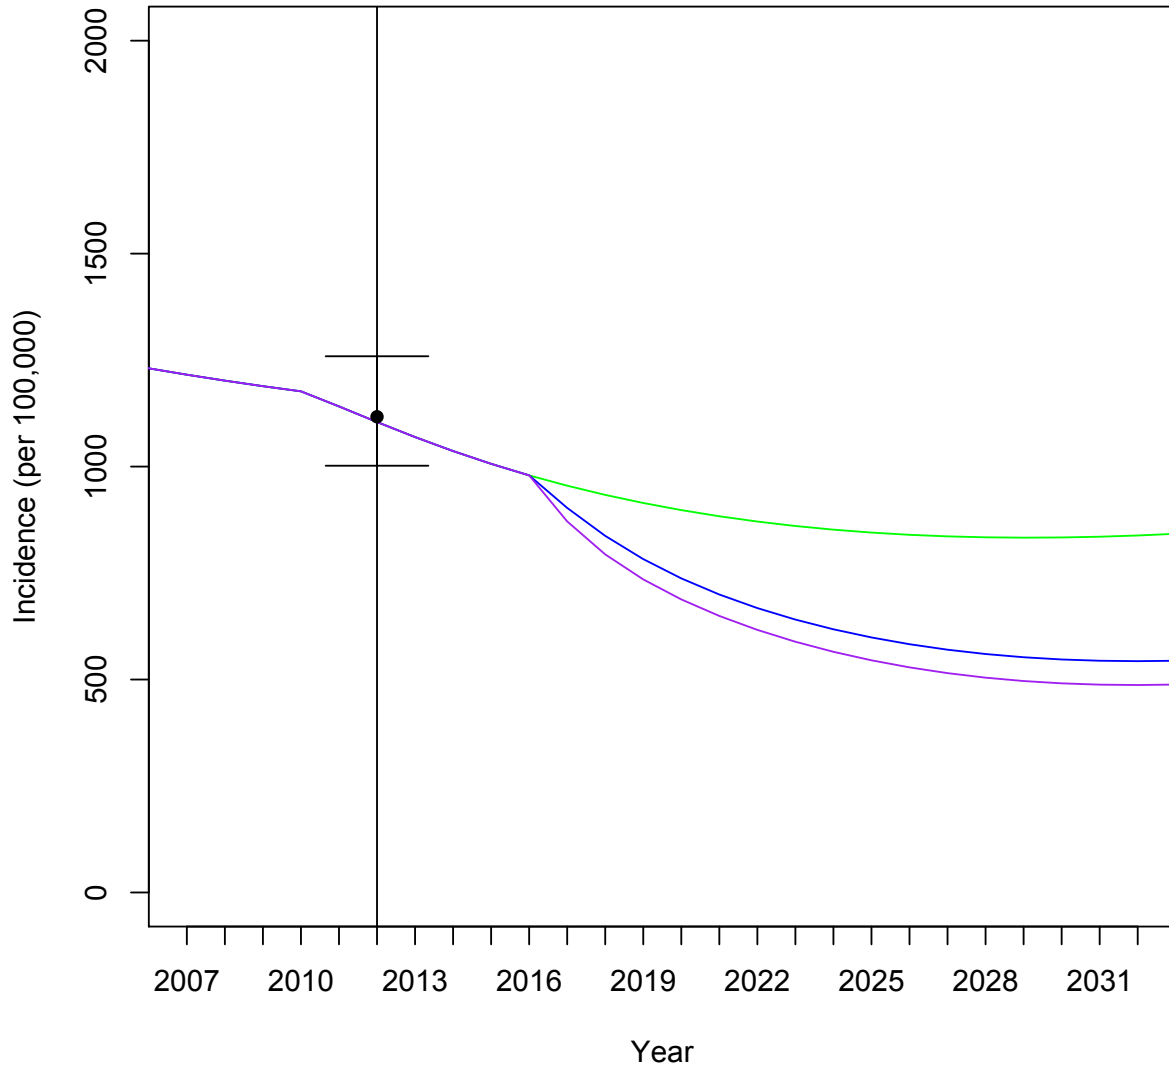

IPT Recovery Rate: 0.6

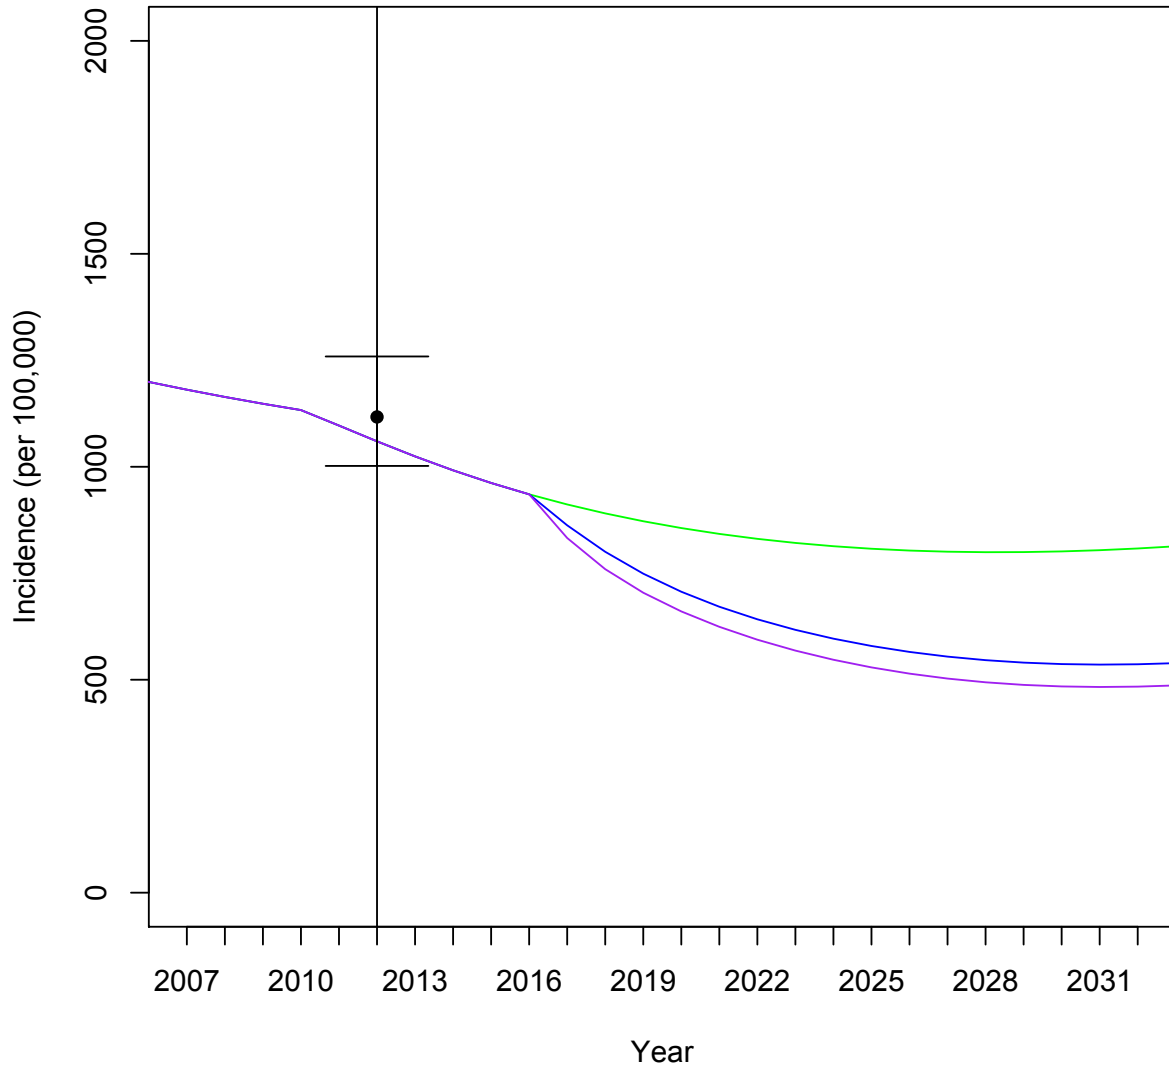

IPT Recovery of 0.9

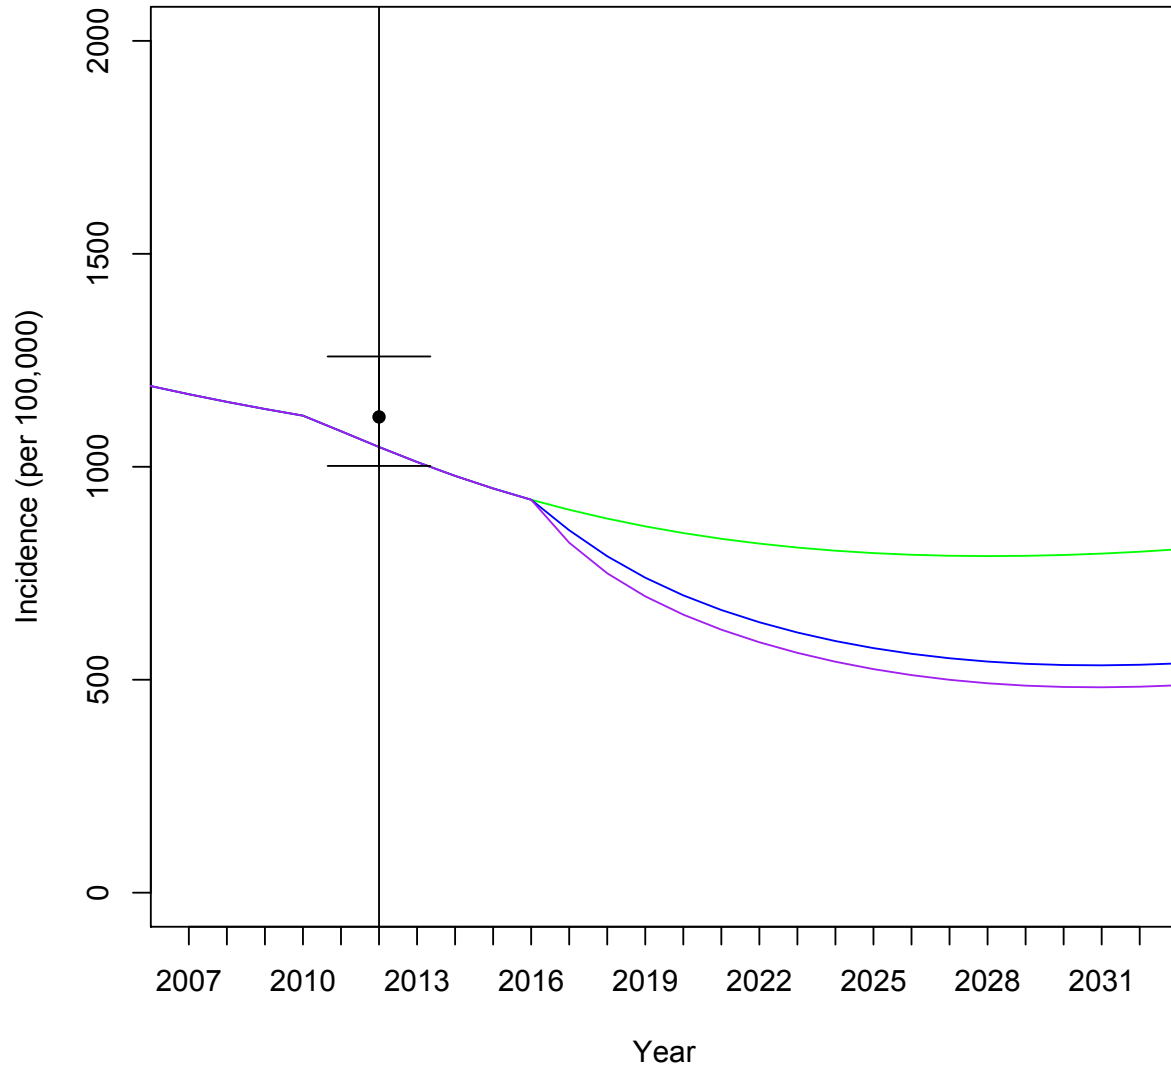



**Figure S4: Sensitivity analysis of TB incidence to TB activation rate in HIV-positive individuals**

TB Activation in HIV+ of 0.005

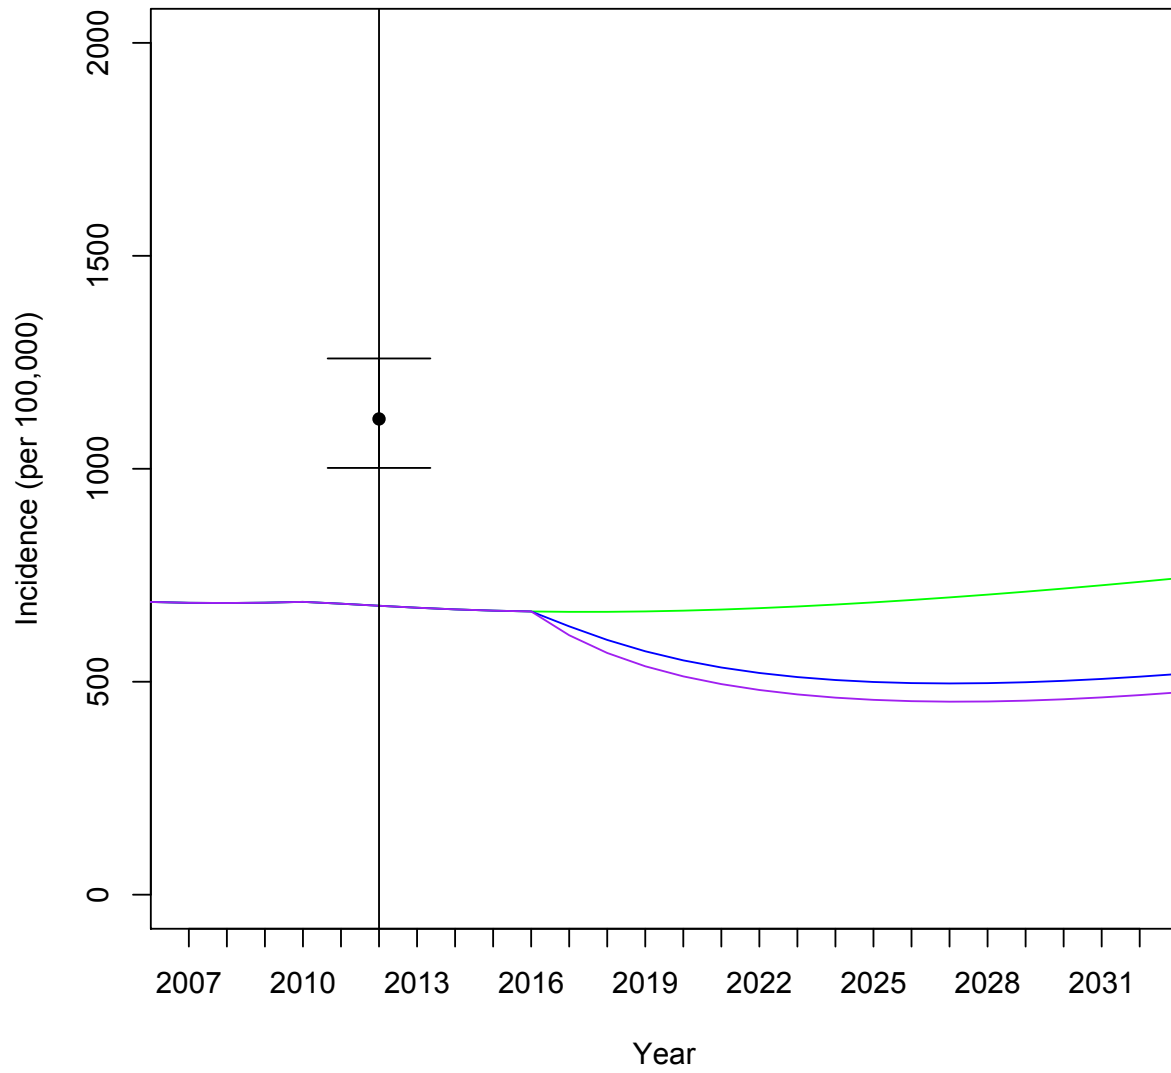

TB Activation in HIV+ of 0.05

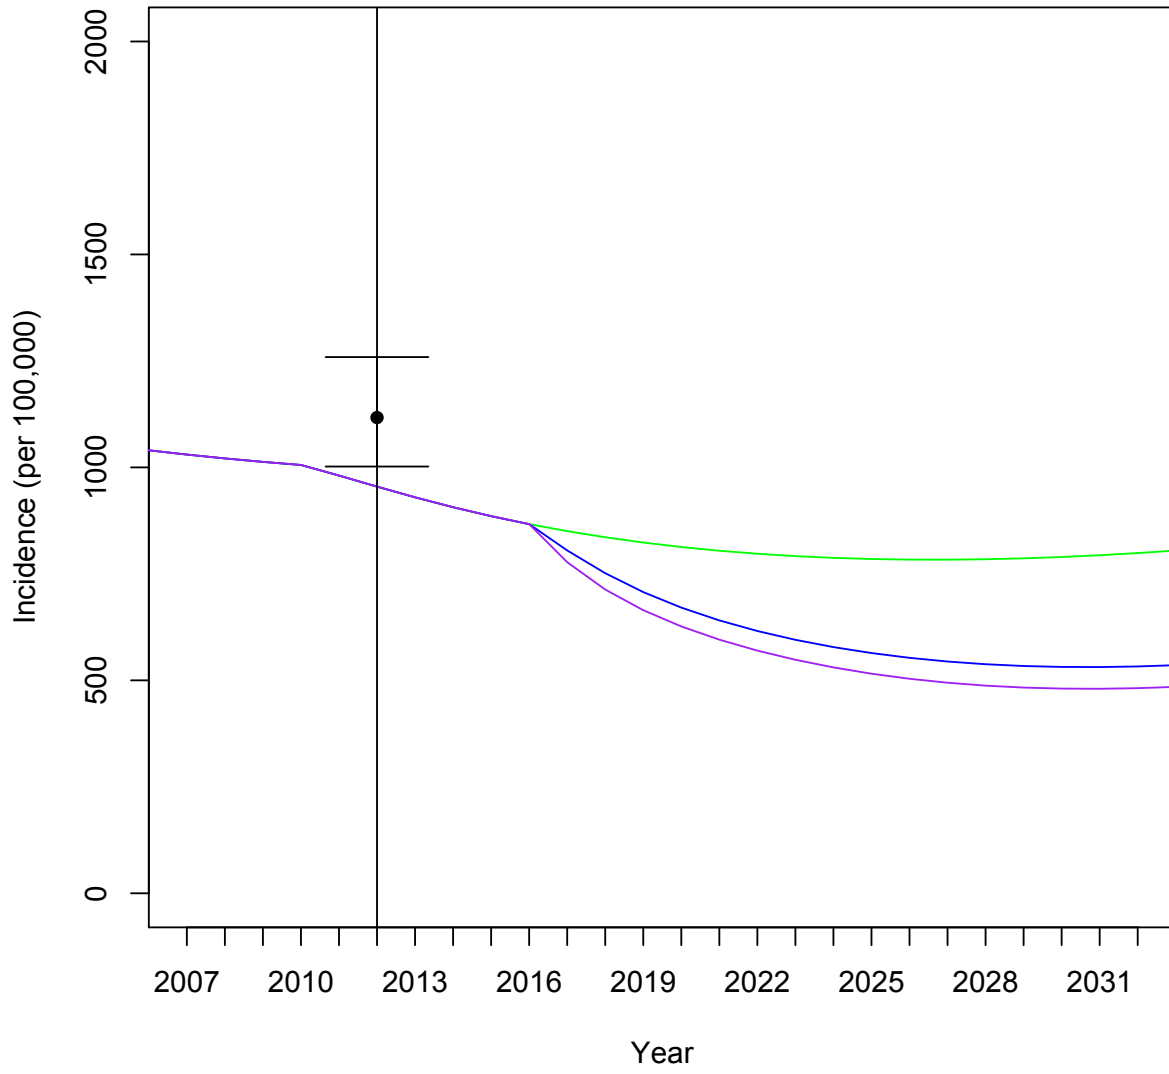

TB Activation in HIV+ of 0.2

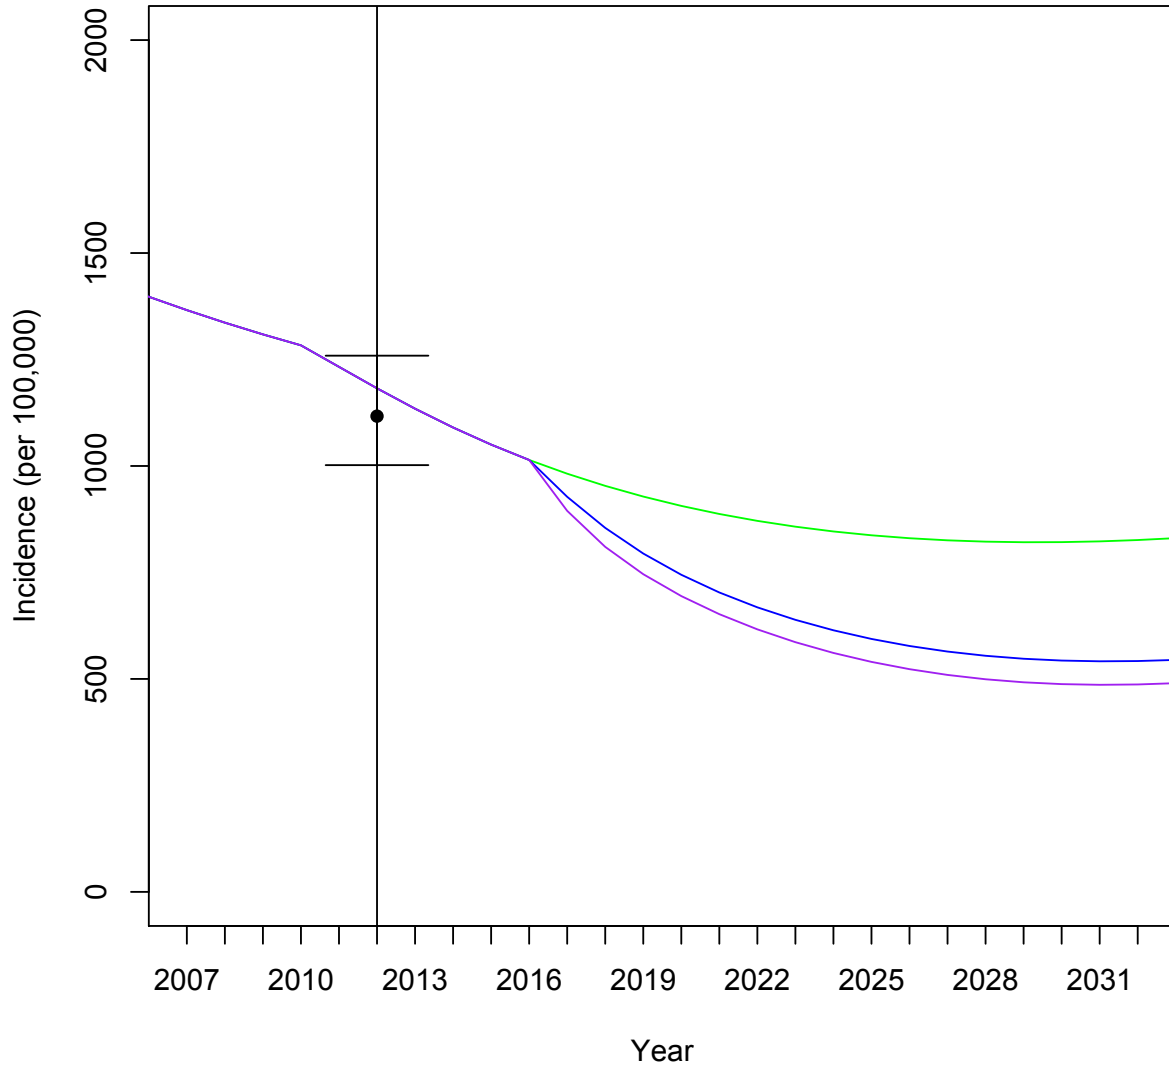

TB Activation in HIV+ of 0.5

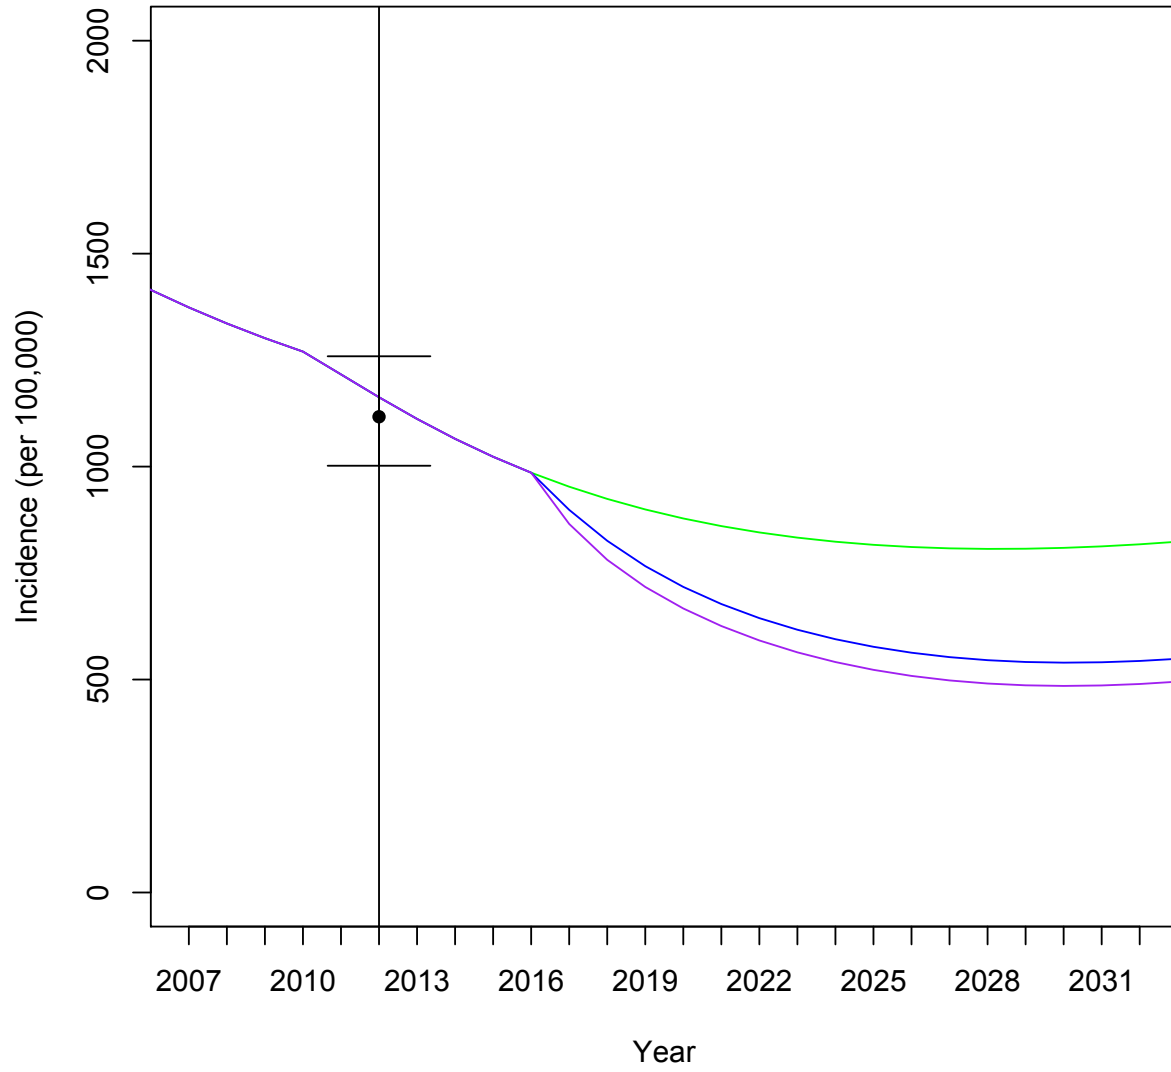

TB Activation in HIV+ of 0.9

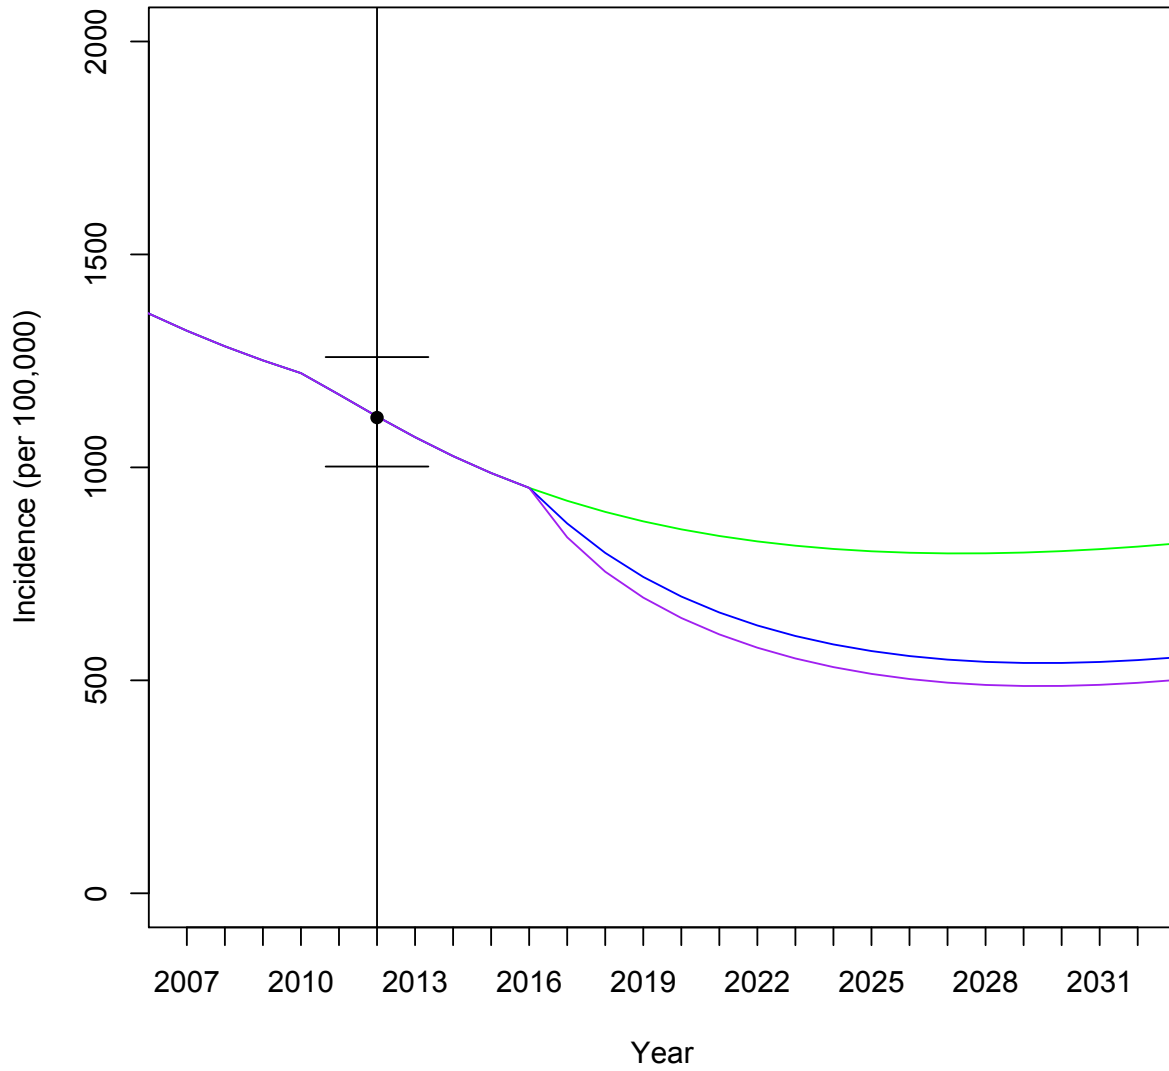

*Figure S5: Sensitivity analysis of the rate at individuals who have recovered from TB cease IPT treatment*

IPT Discontinuation Rate of 0.05

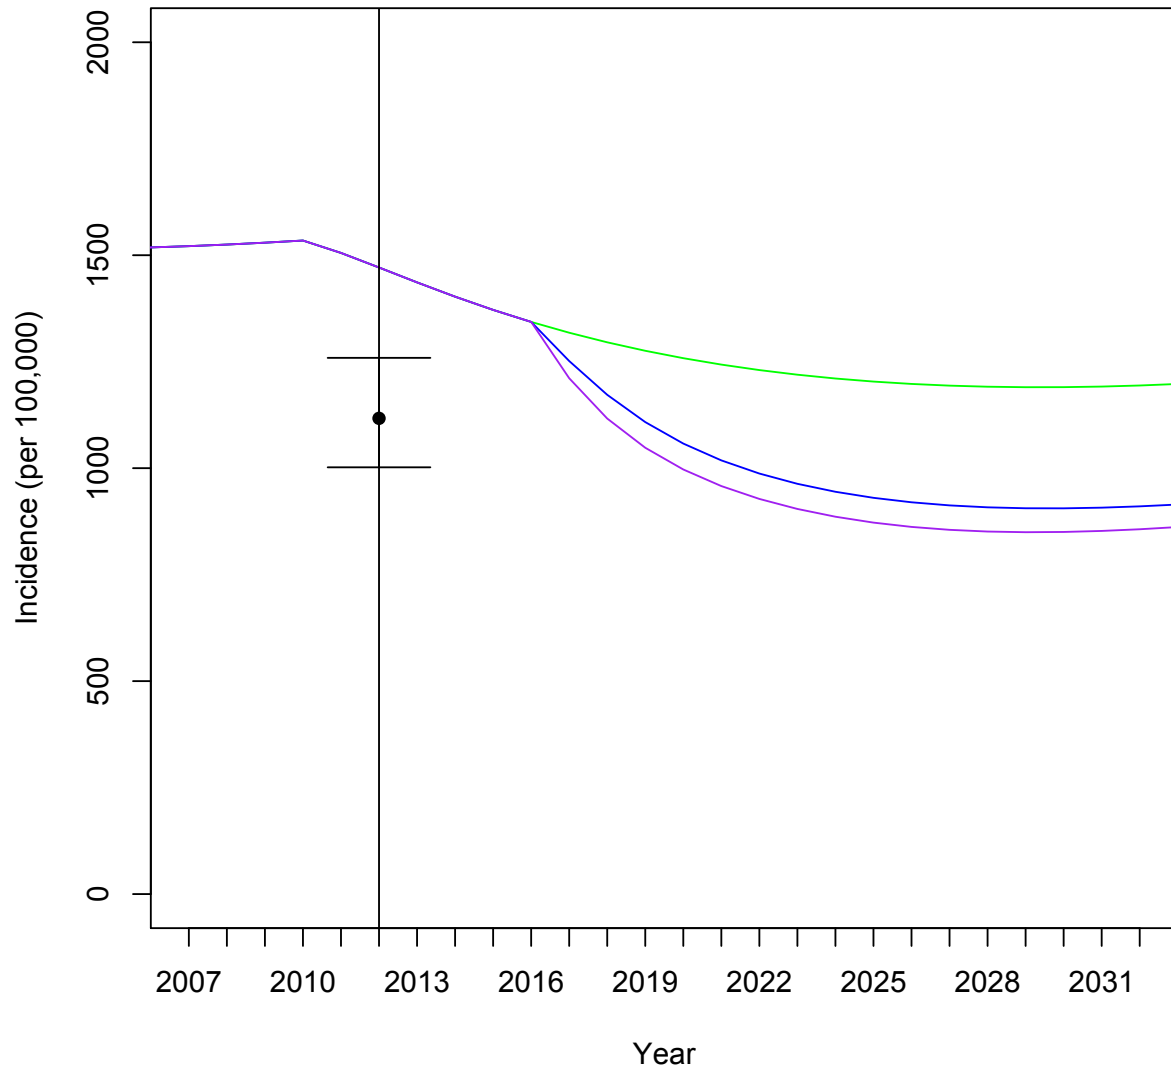

IPT Discontinuation Rate of 0.1

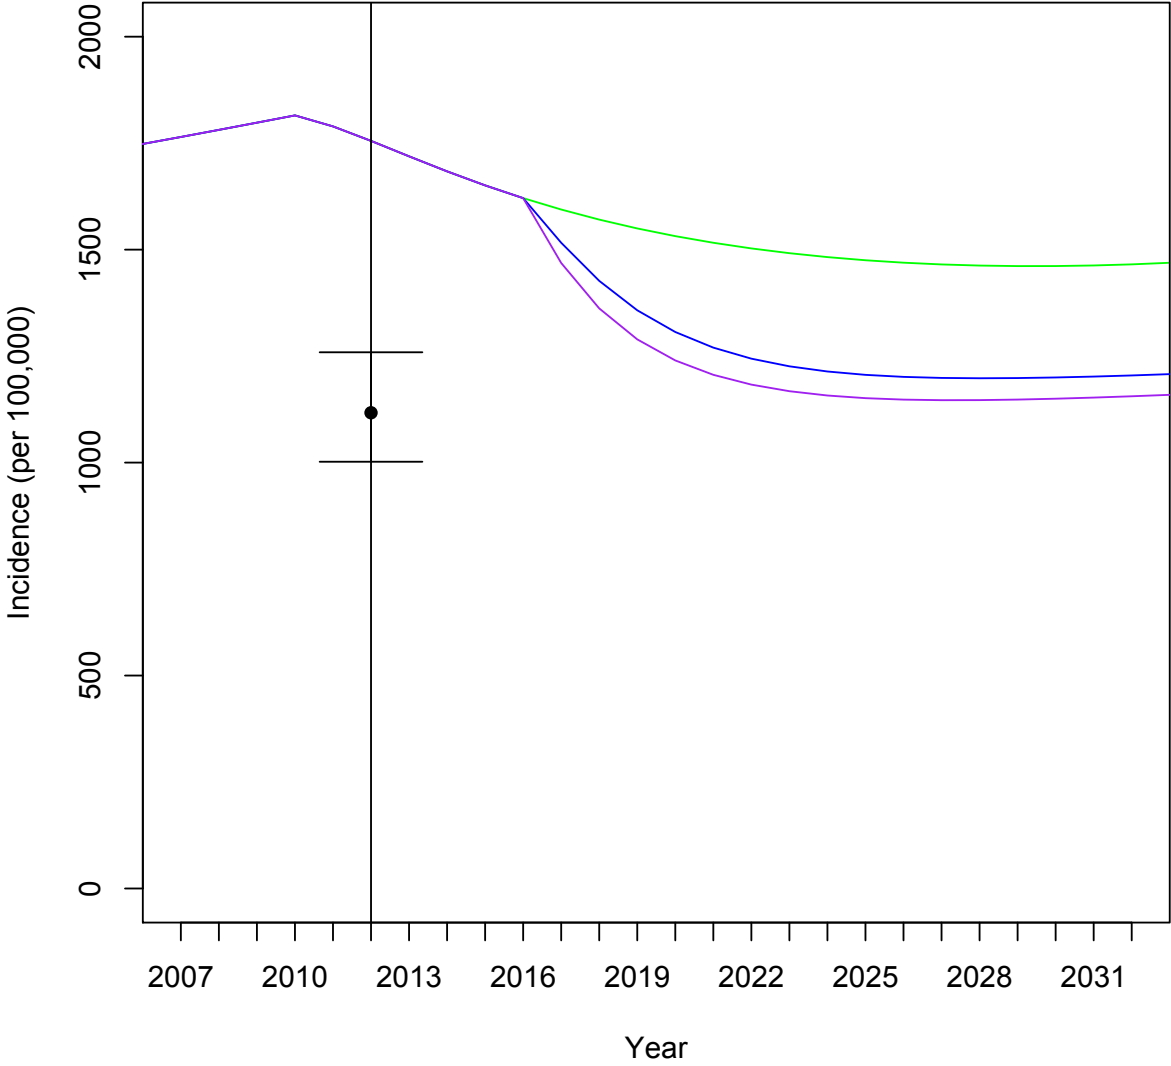

IPT Discontinuation Rate of 0.15

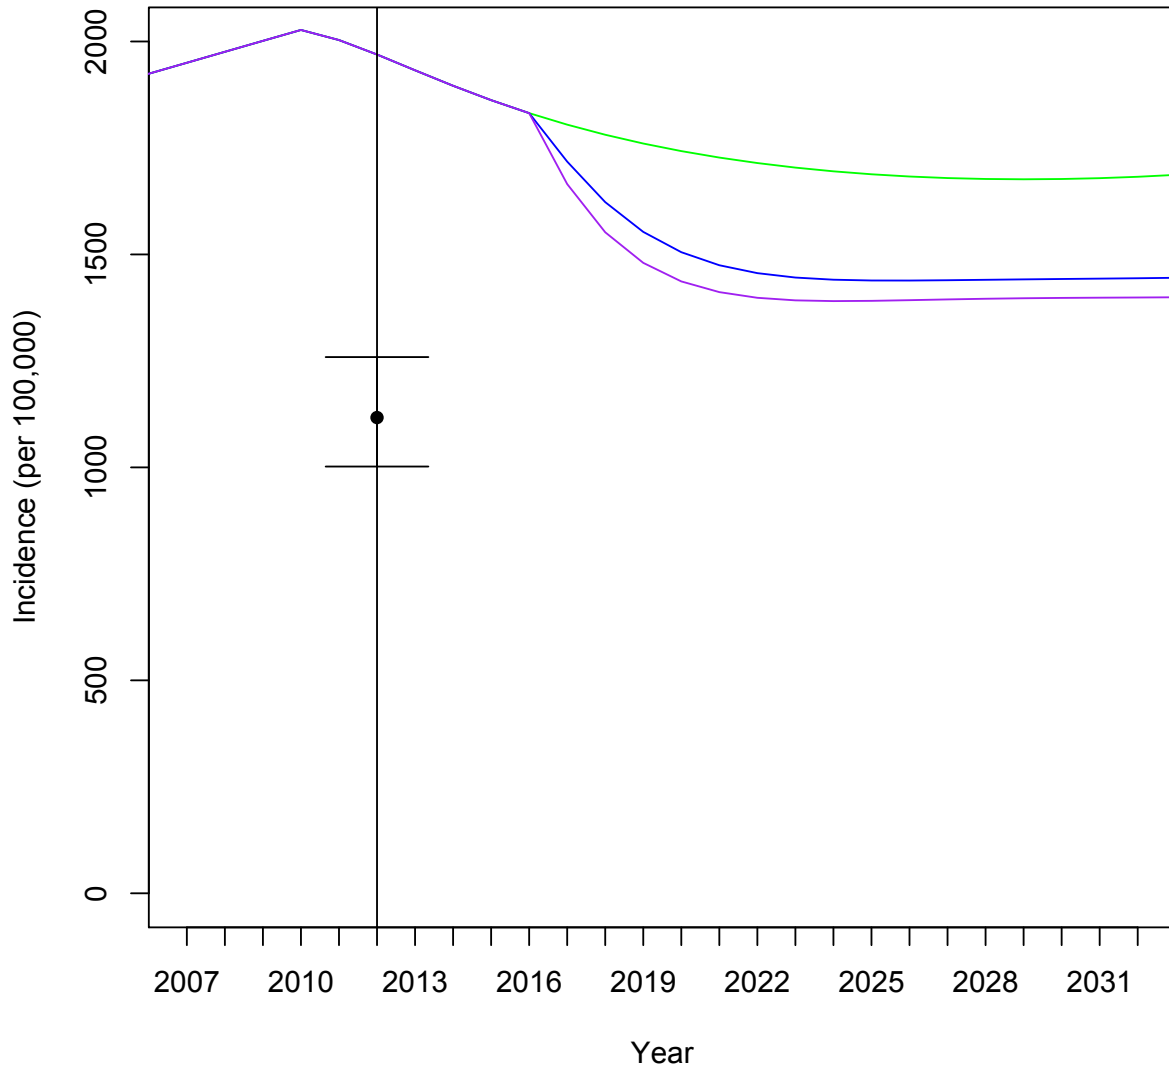



Figure S6: Effects of IPT on TB disease indicators

TB Incidence in Adolescents

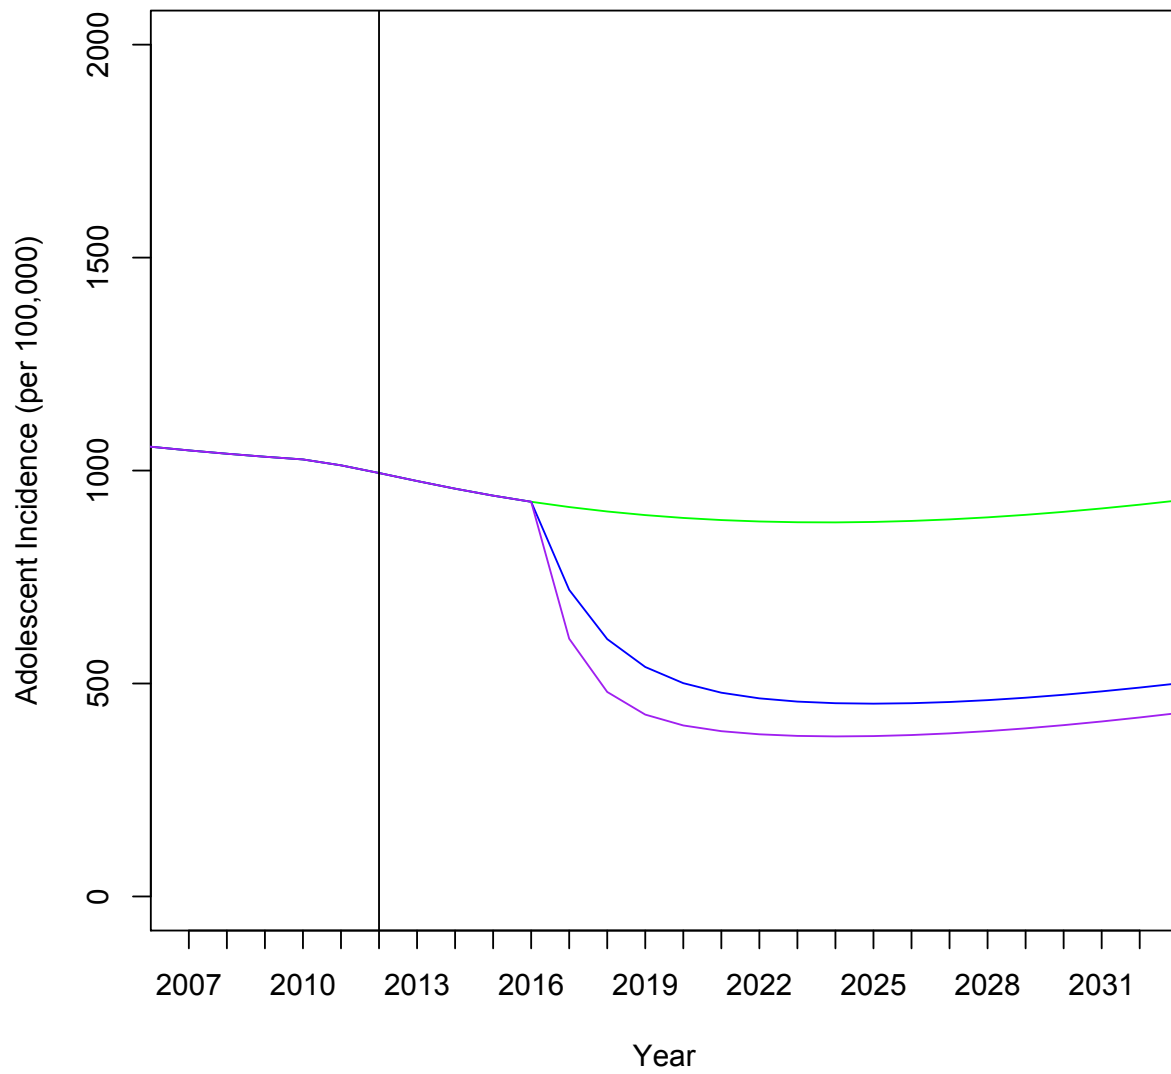

TB Incidence in Adults

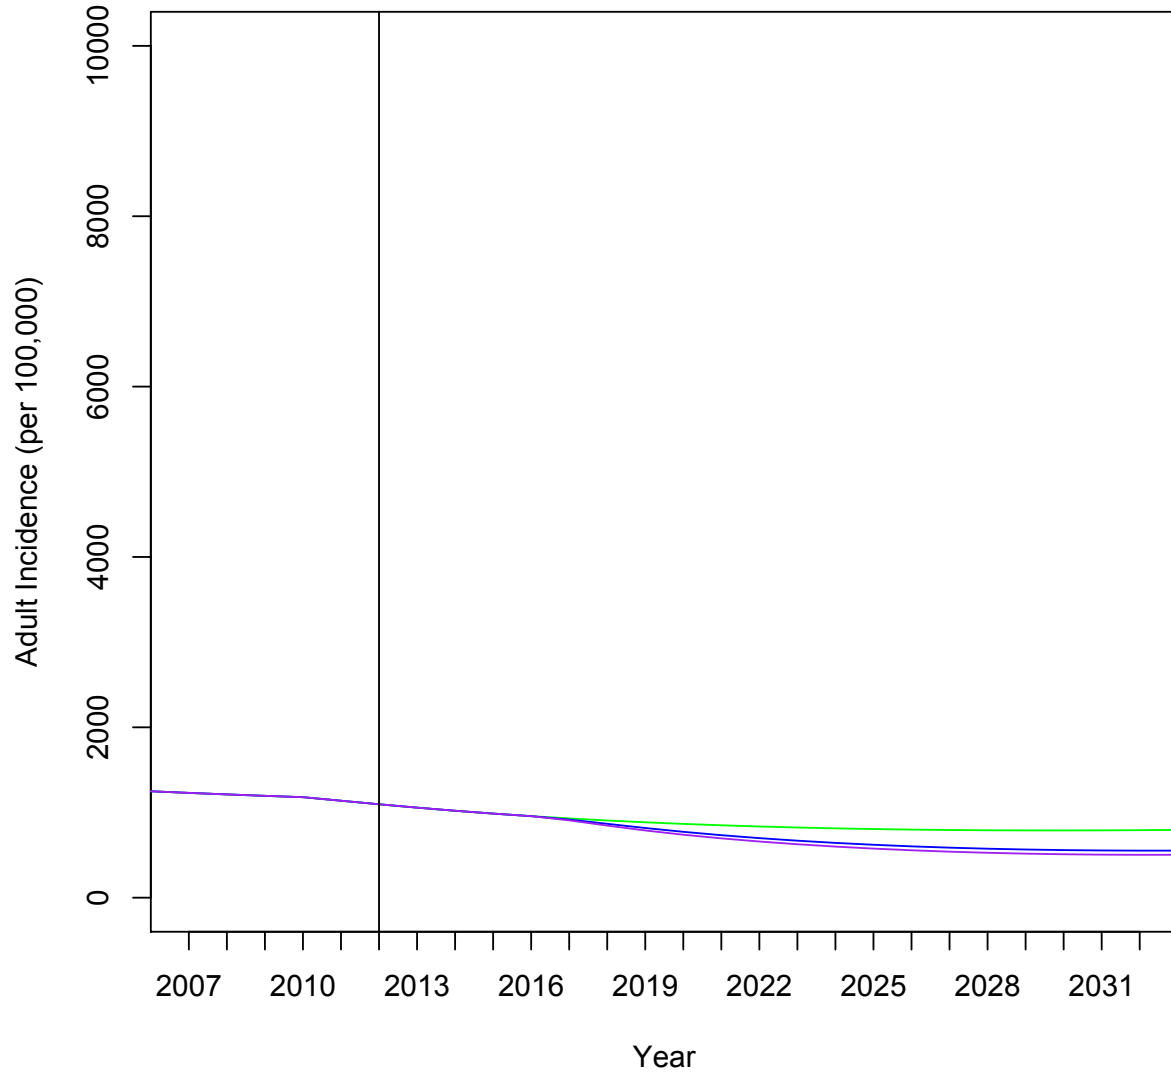

## TB Prevalence in Adolescents

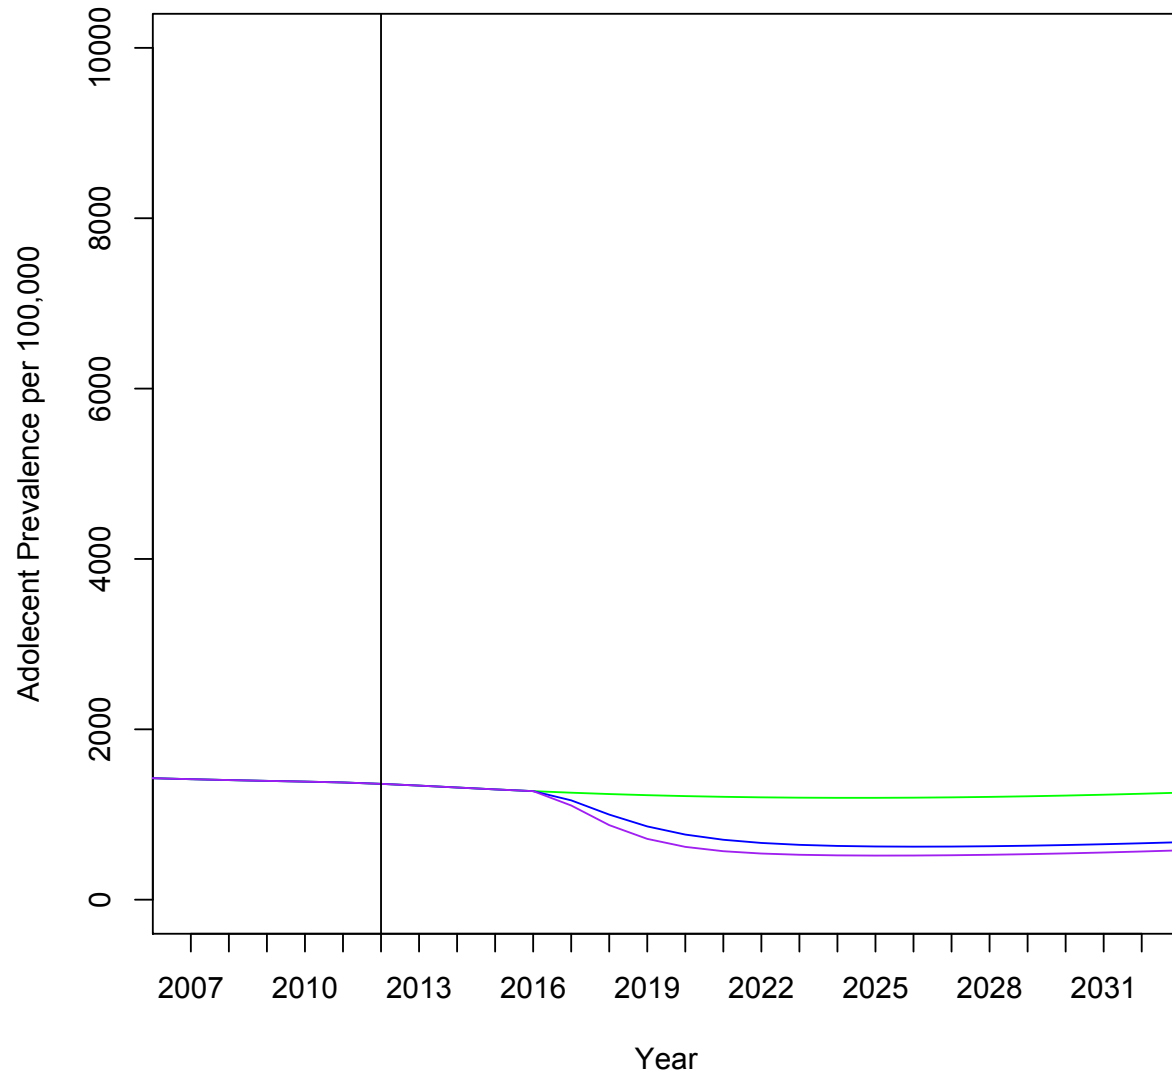

## TB Prevalence in Adults

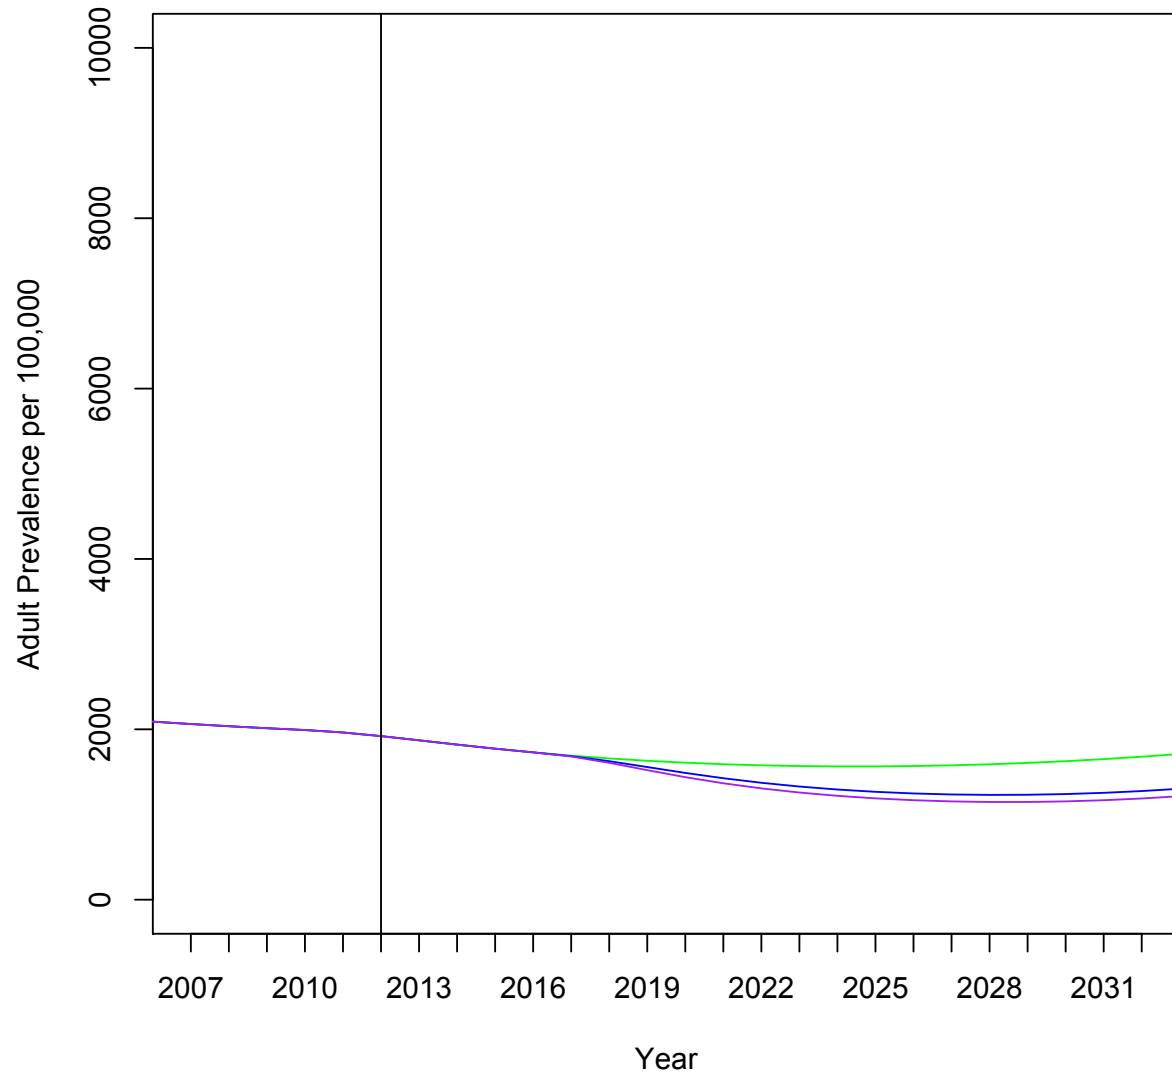

## TB Mortality in Adolescents

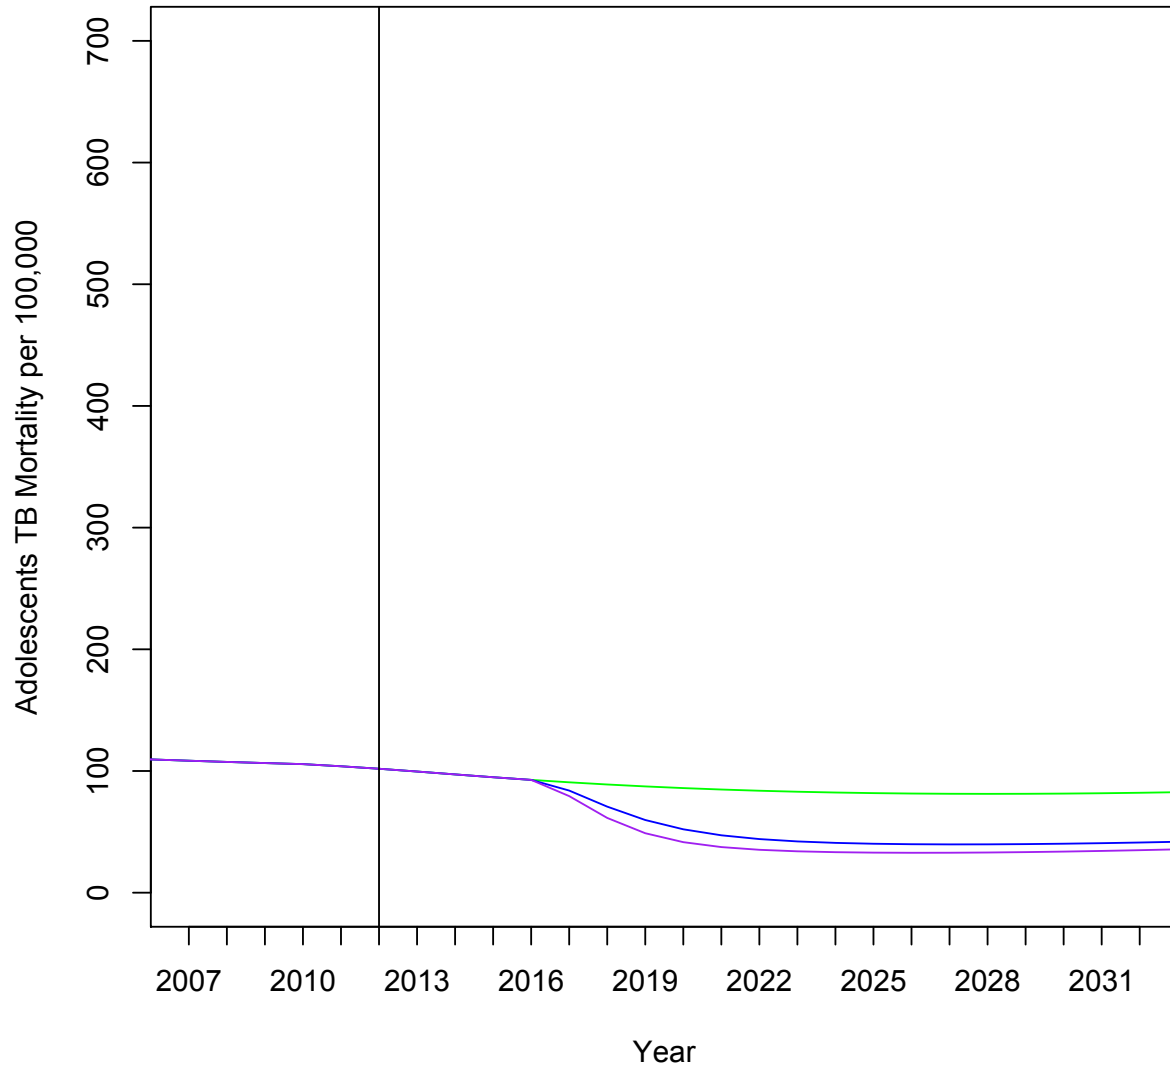

TB Mortality in Adults

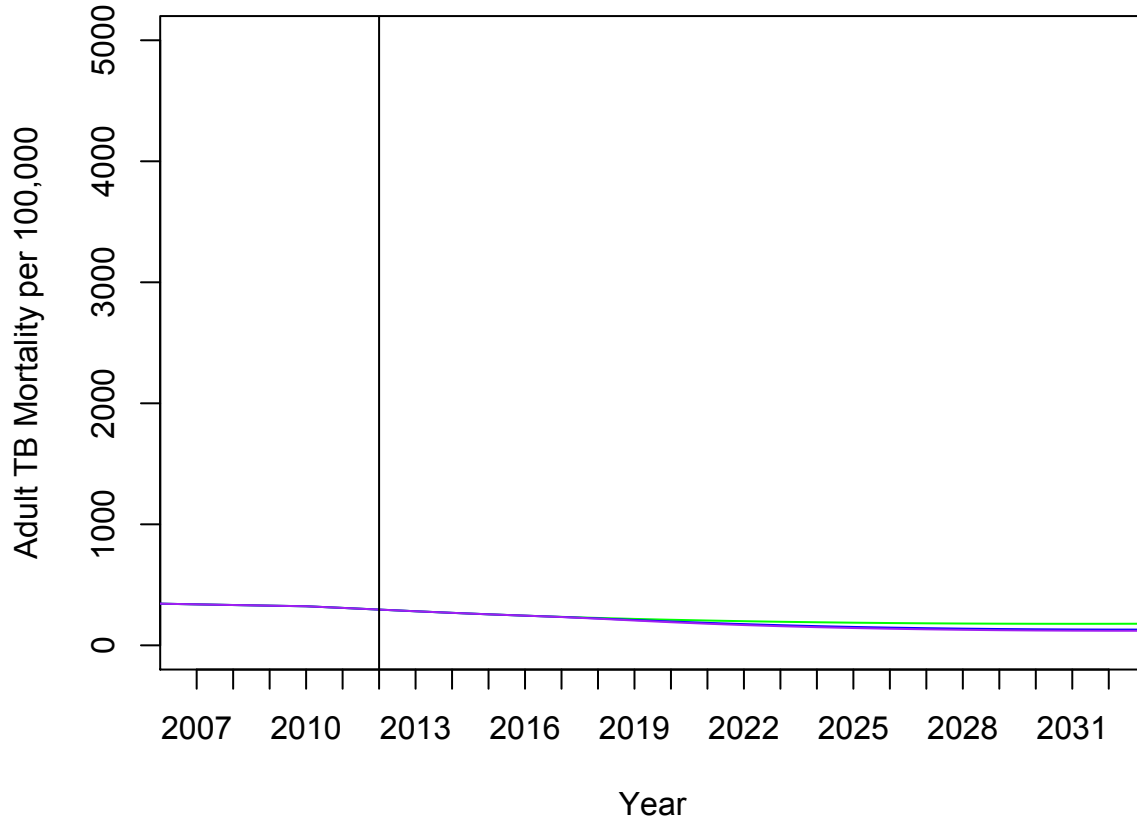

## HIV Prevalence

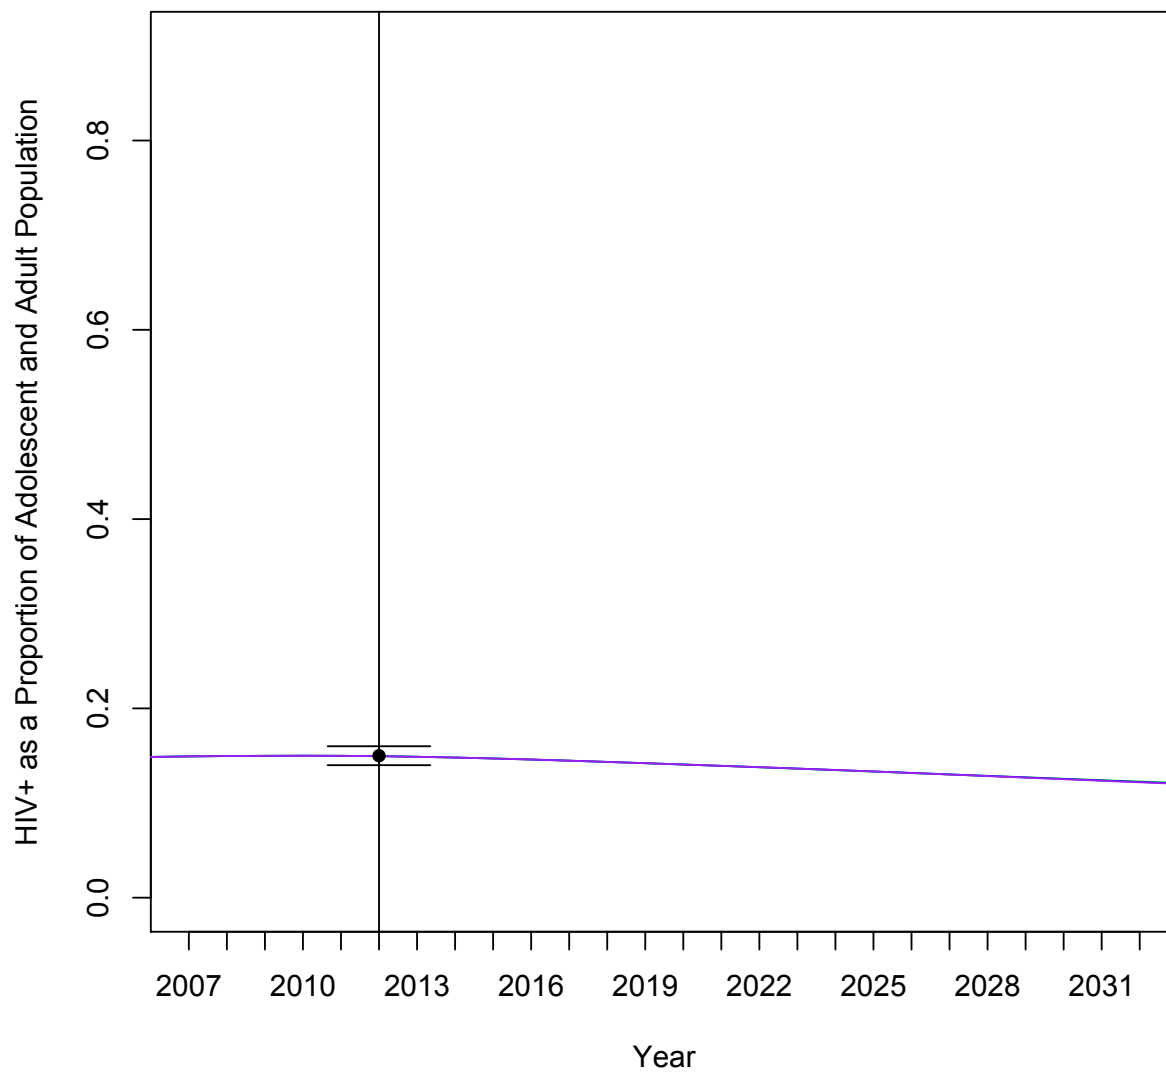

Proportion of HIV-Positive Individuals on ART

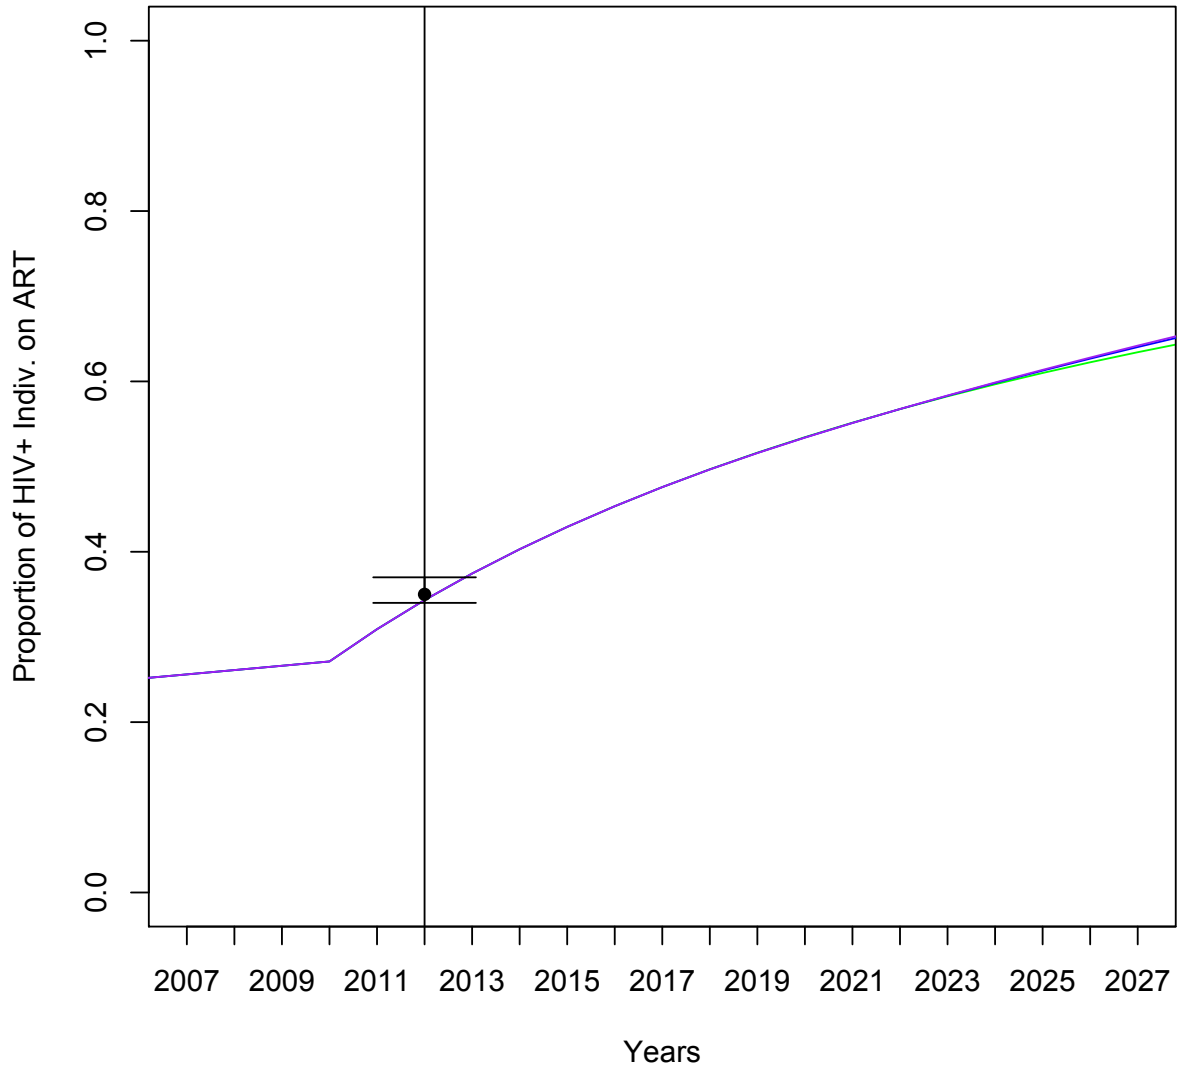



Proportion of TB Mortality in HIV-Positive Individuals

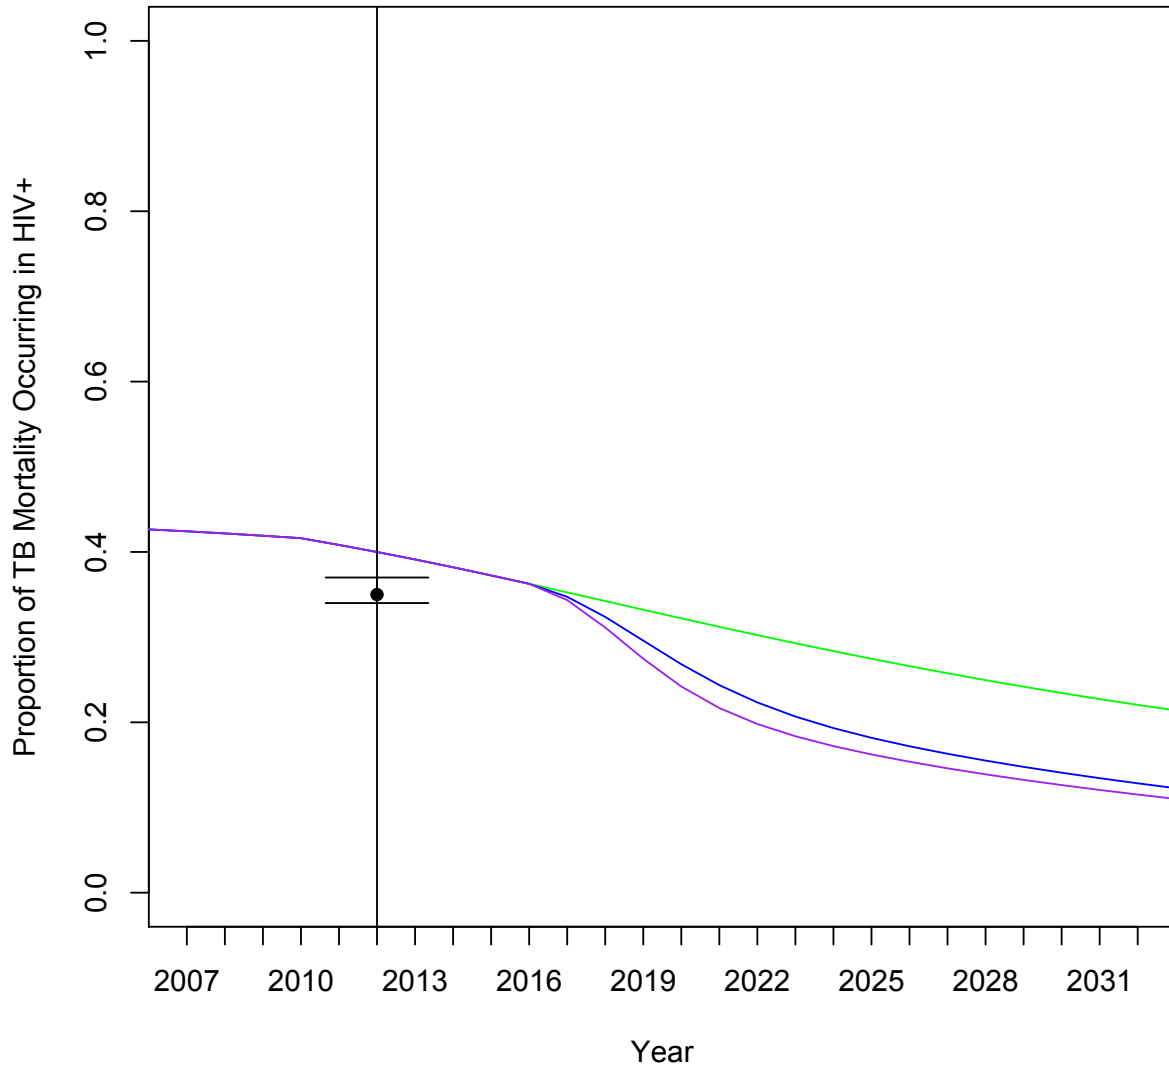

*Figure S7: Sensitivity analysis to the rate of HIV infection*

HIV Incidence of 0.0000000001

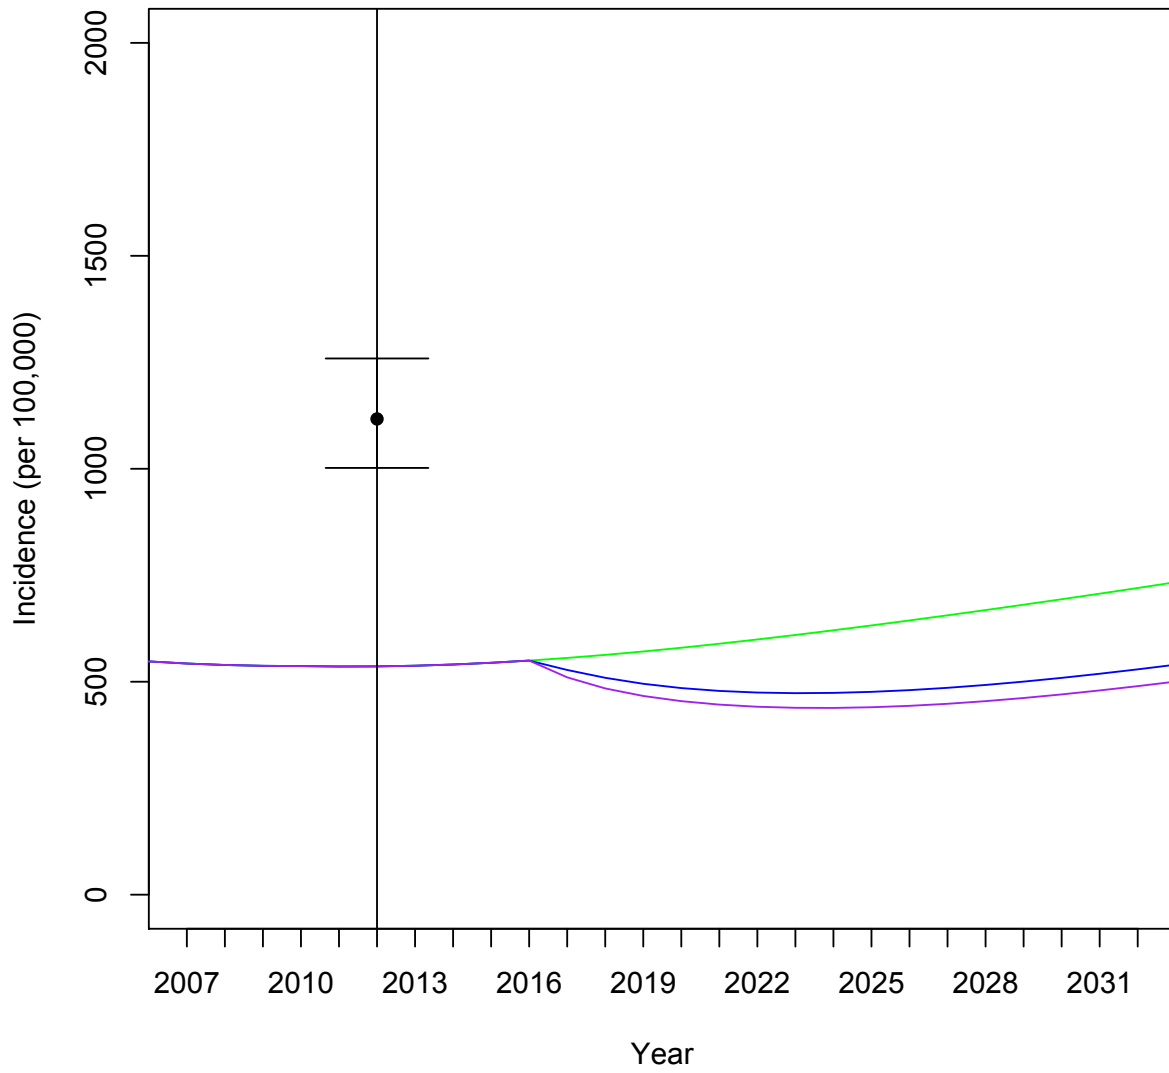

HIV Incidence of 0.000000001

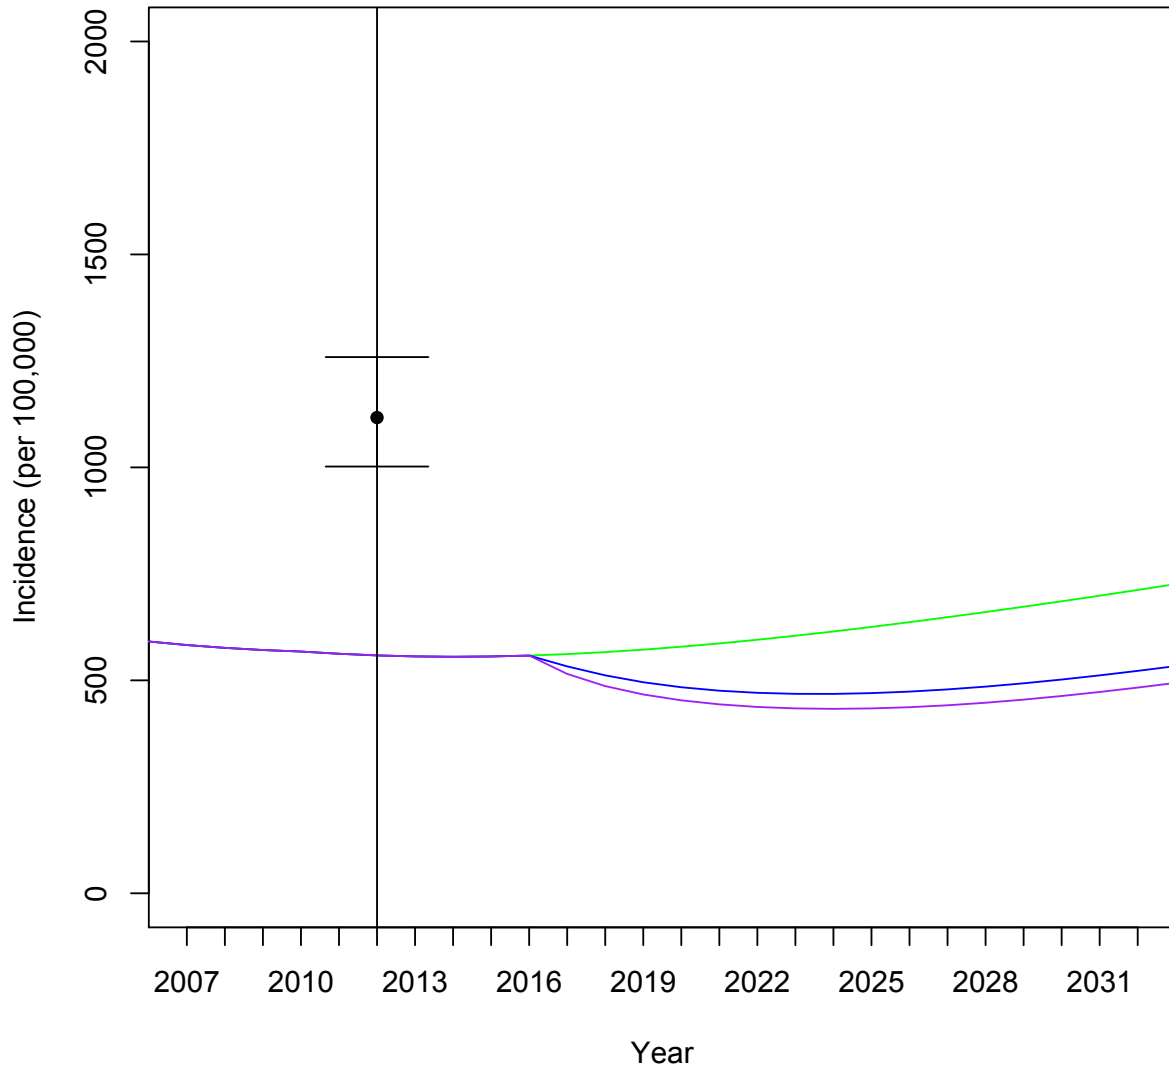

HIV Incidence of 0.000000002

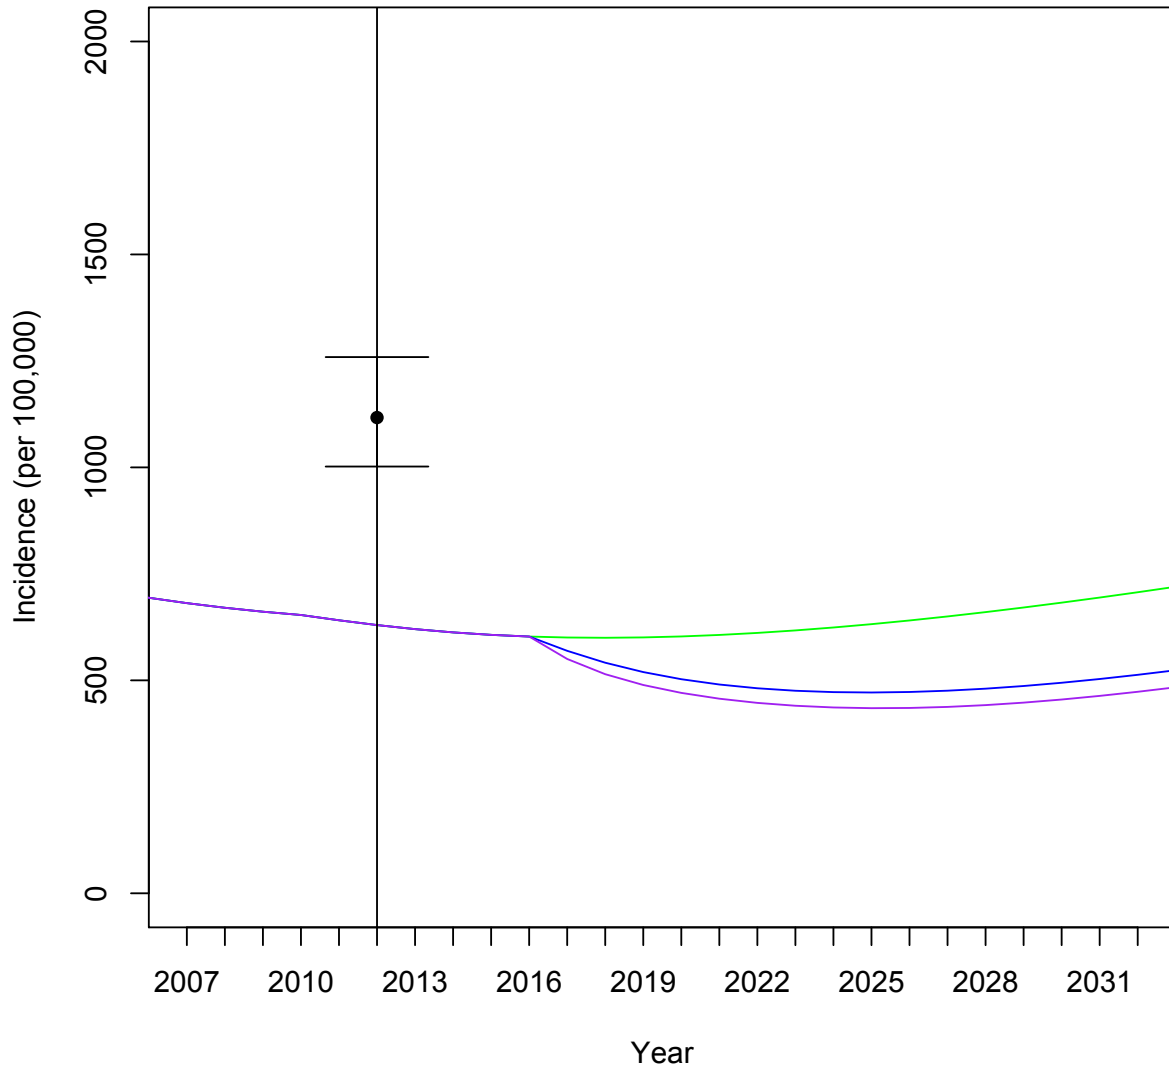

HIV Incidence of 0.000000003

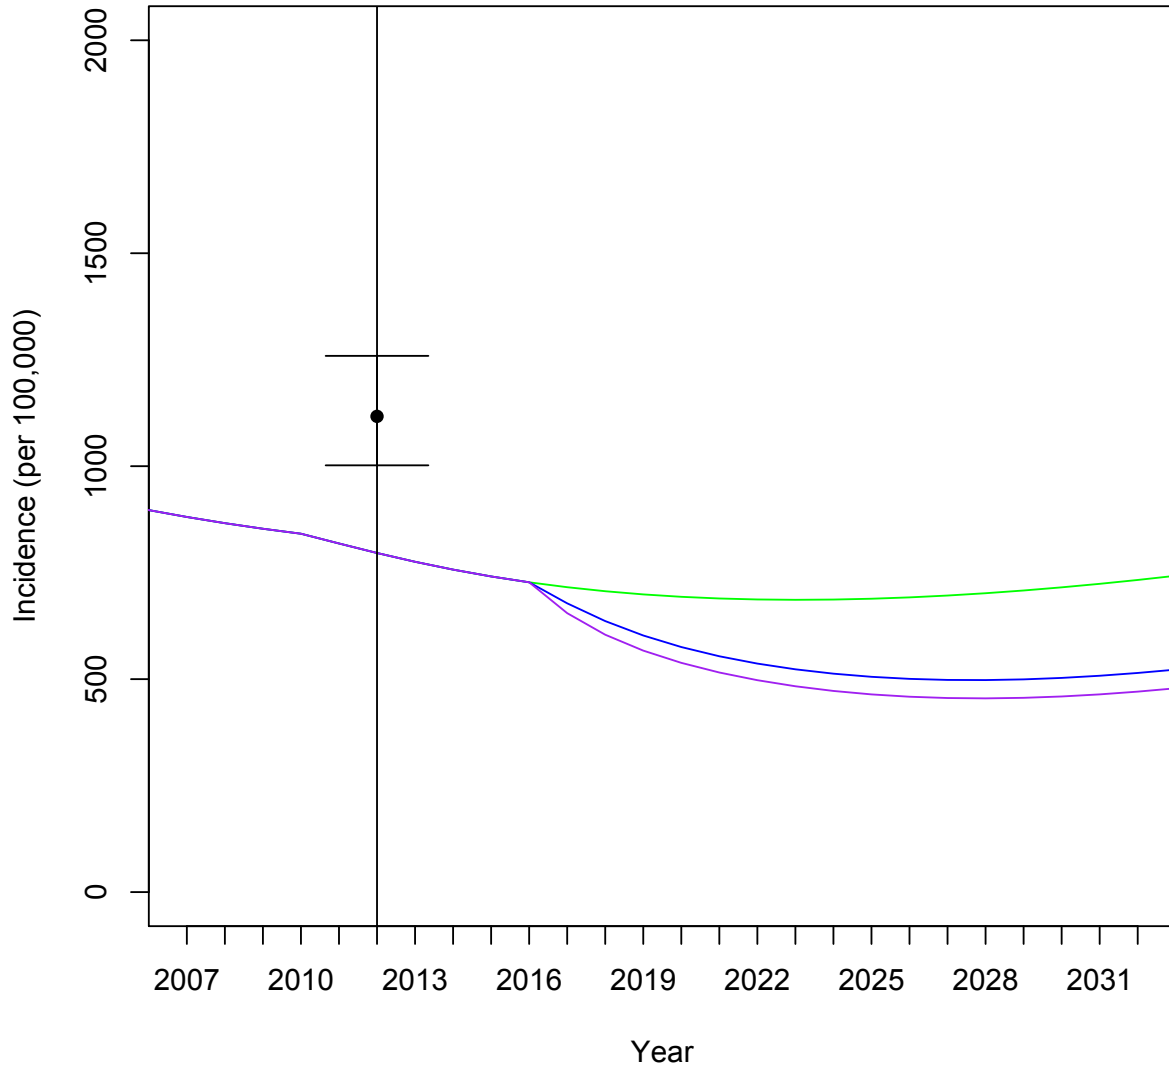

HIV Incidence of 0.000000004

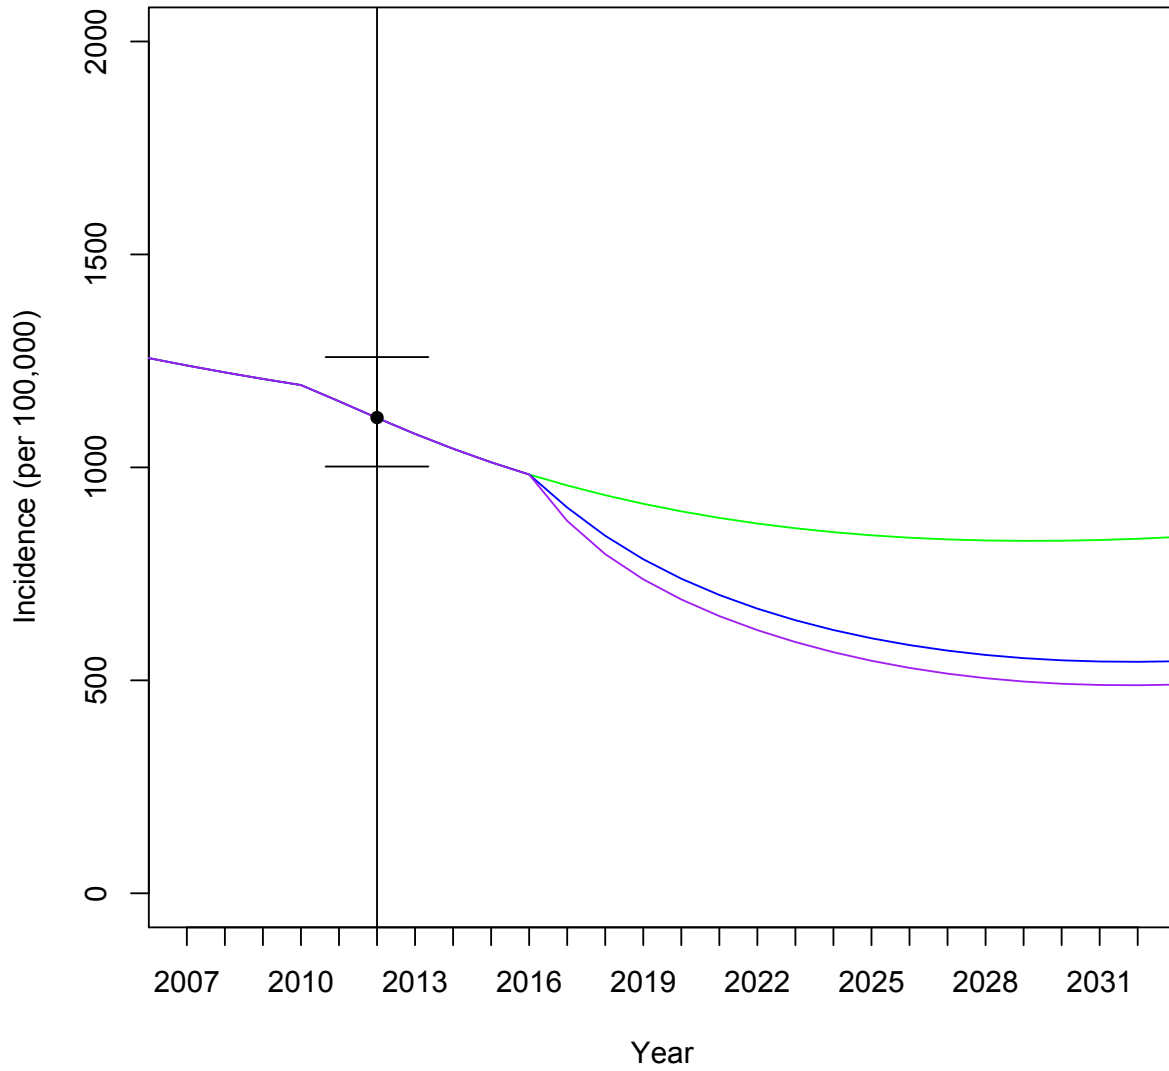

HIV Incidence of 0.000000005

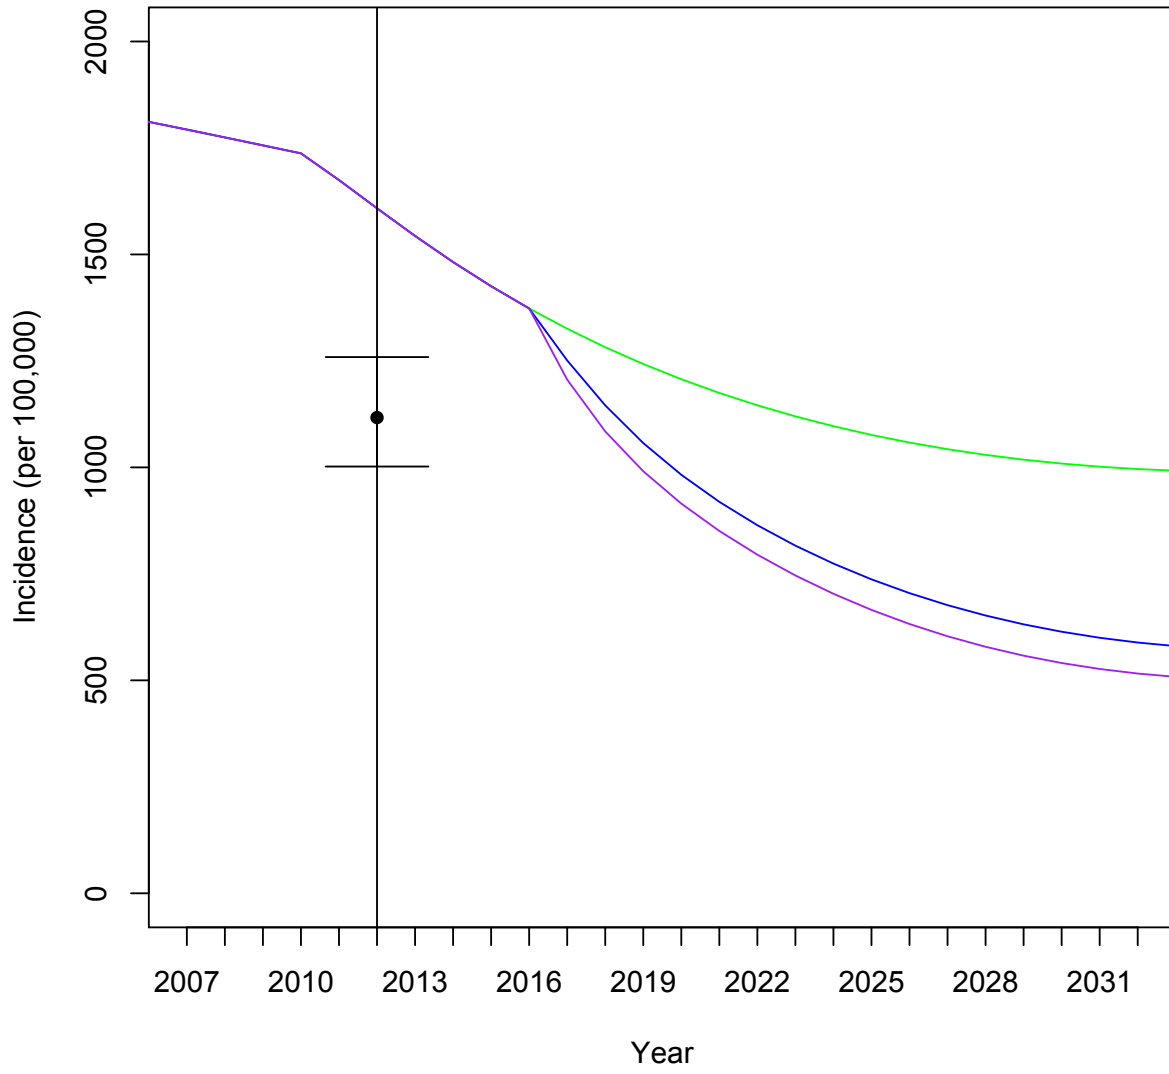

HIV Incidence of 0.0000000055

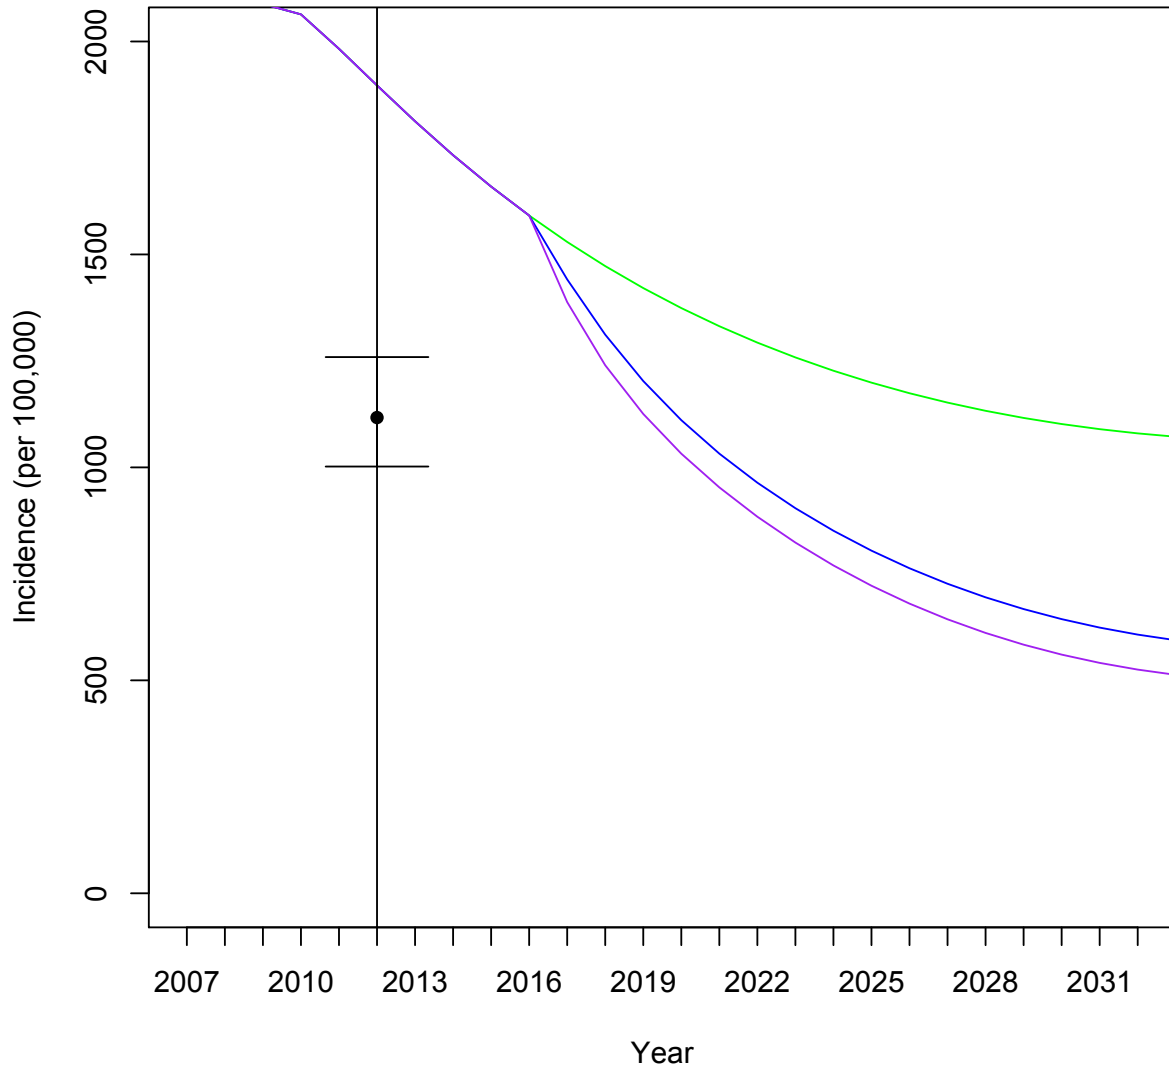



*Figure S8: Sensitivity analysis to birthrate*

Birthrate of 0.001

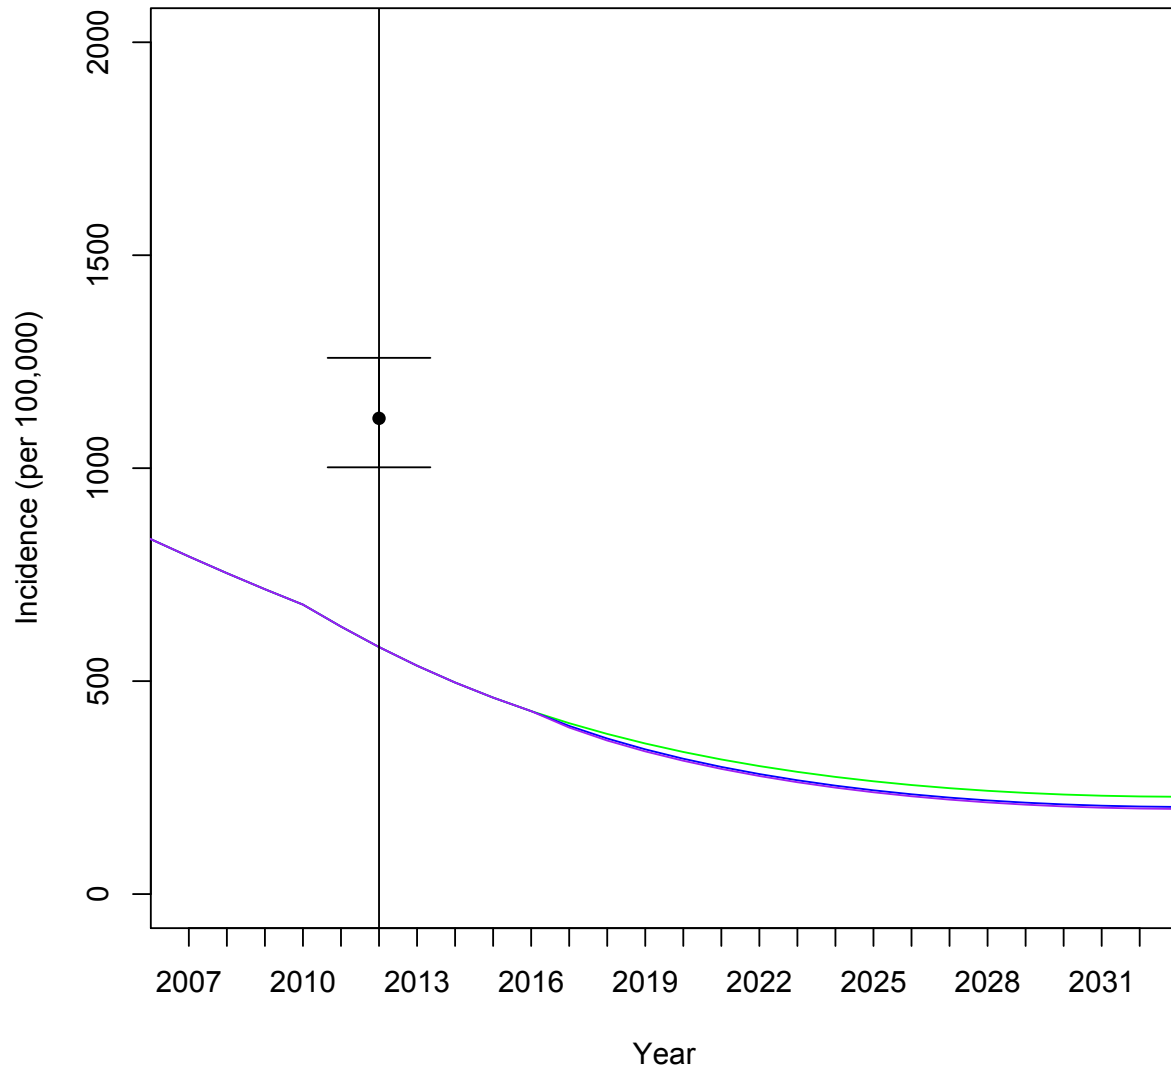

Birthrate of 0.01

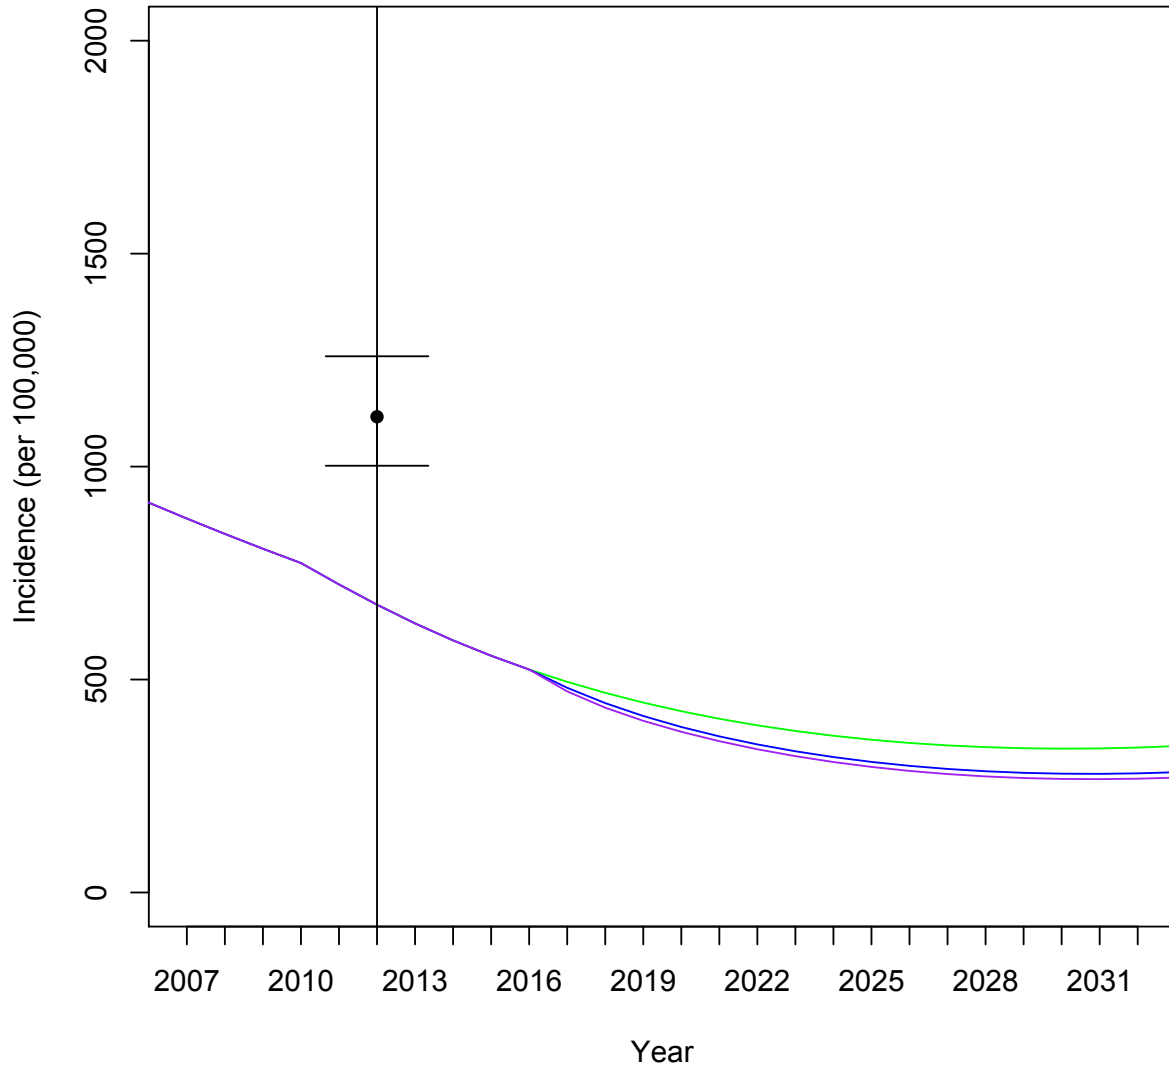

Birthrate of 0.02

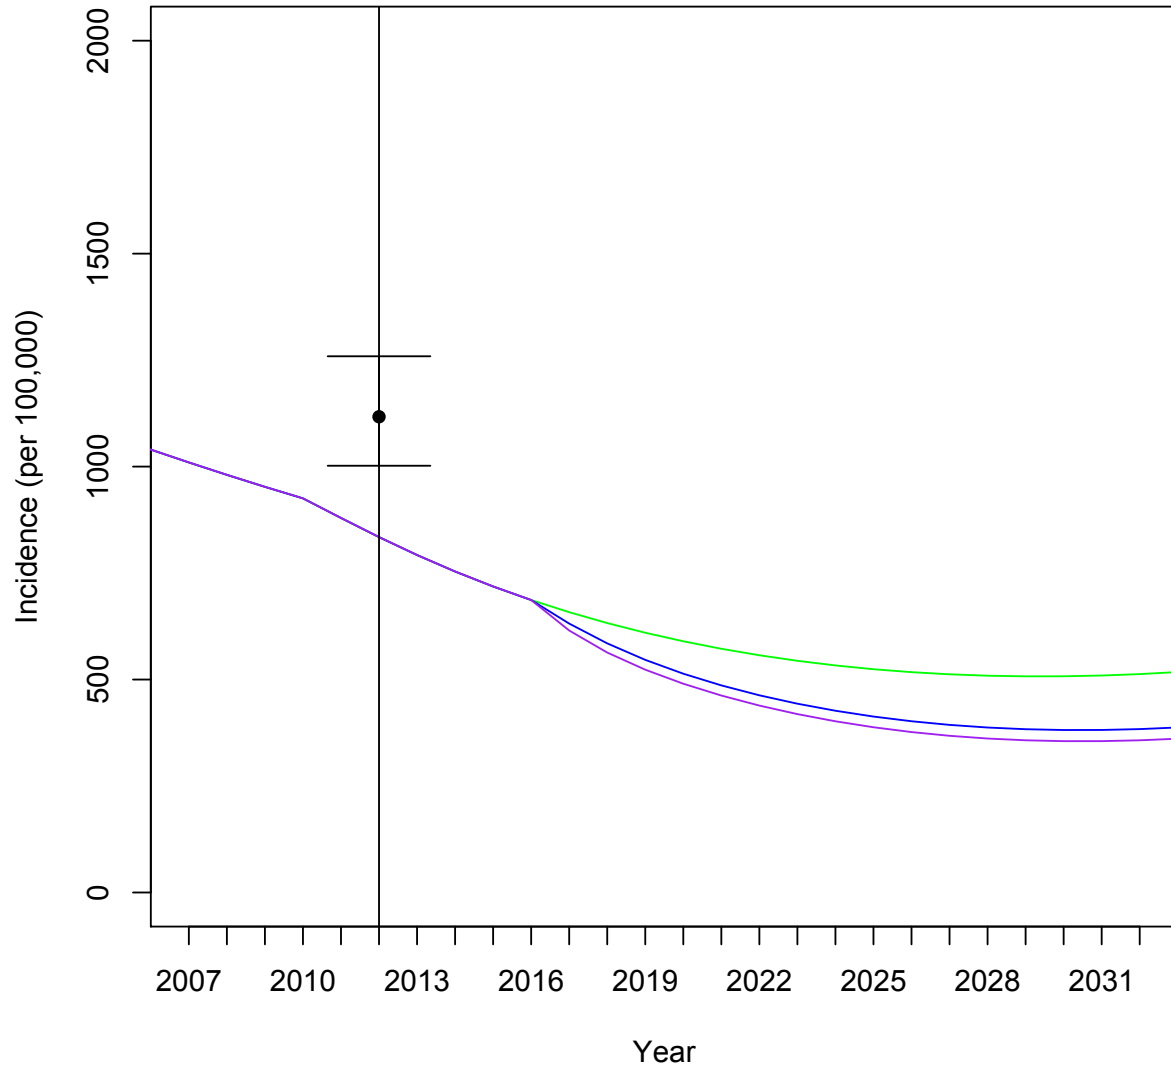

Birthrate of 0.04

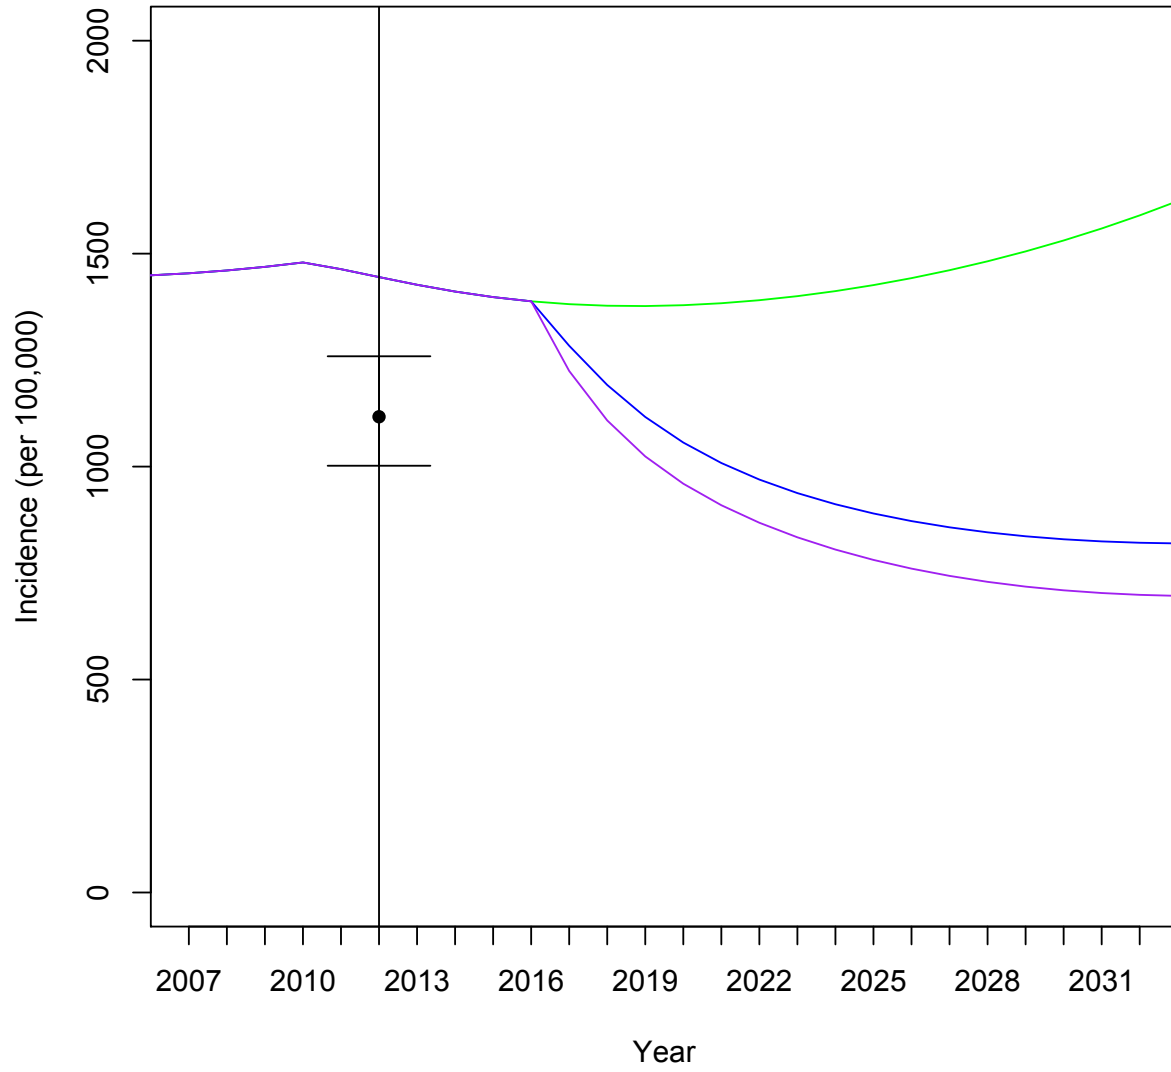

*Figure S9: Effects of expanding IPT to adults*

TB Incidence as a Result of Adolescent and Adult IPT

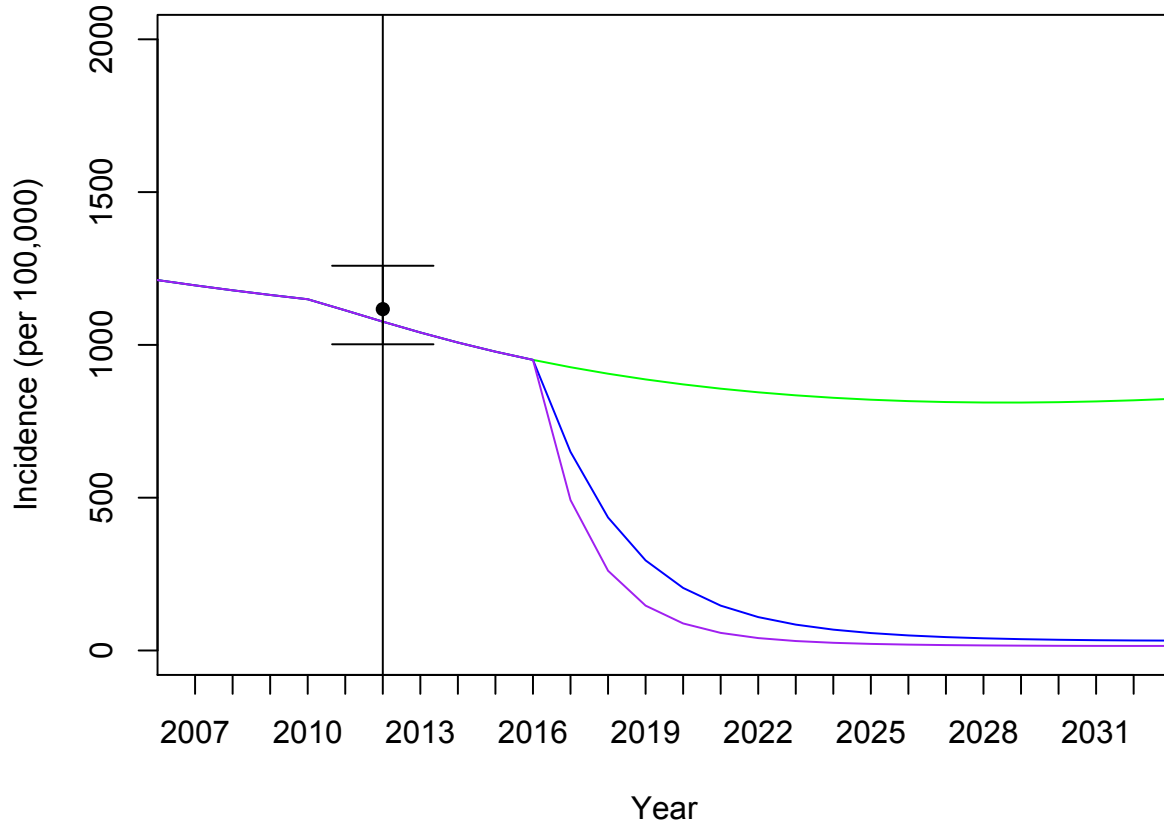

*Figure S10: Effects of general adolescent IPT on TB incidence in HIV-positive population*

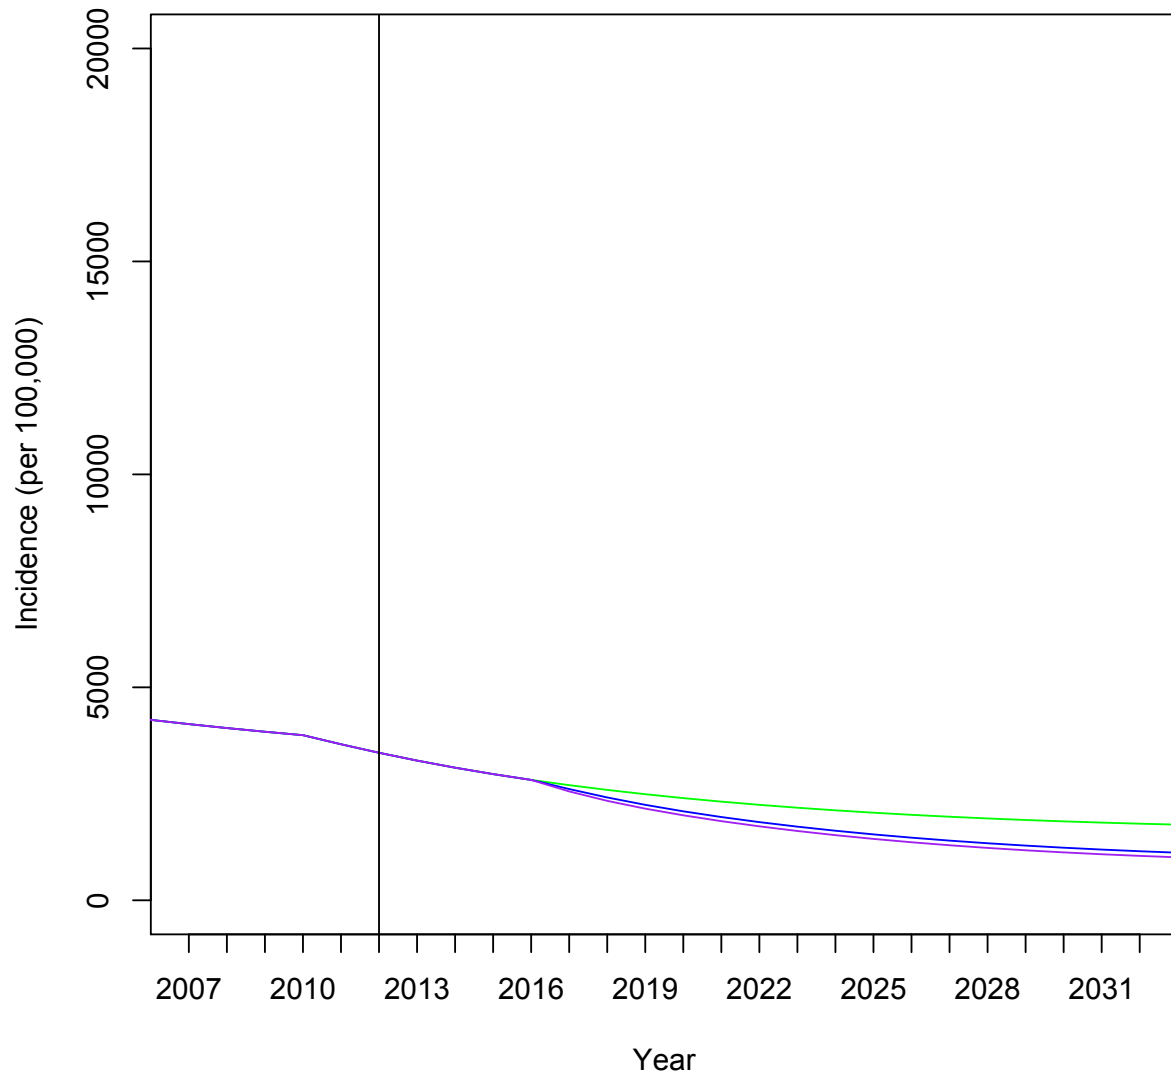

*Figure S11: Effects of general adolescent IPT on TB incidence in HIV-positive adult population*

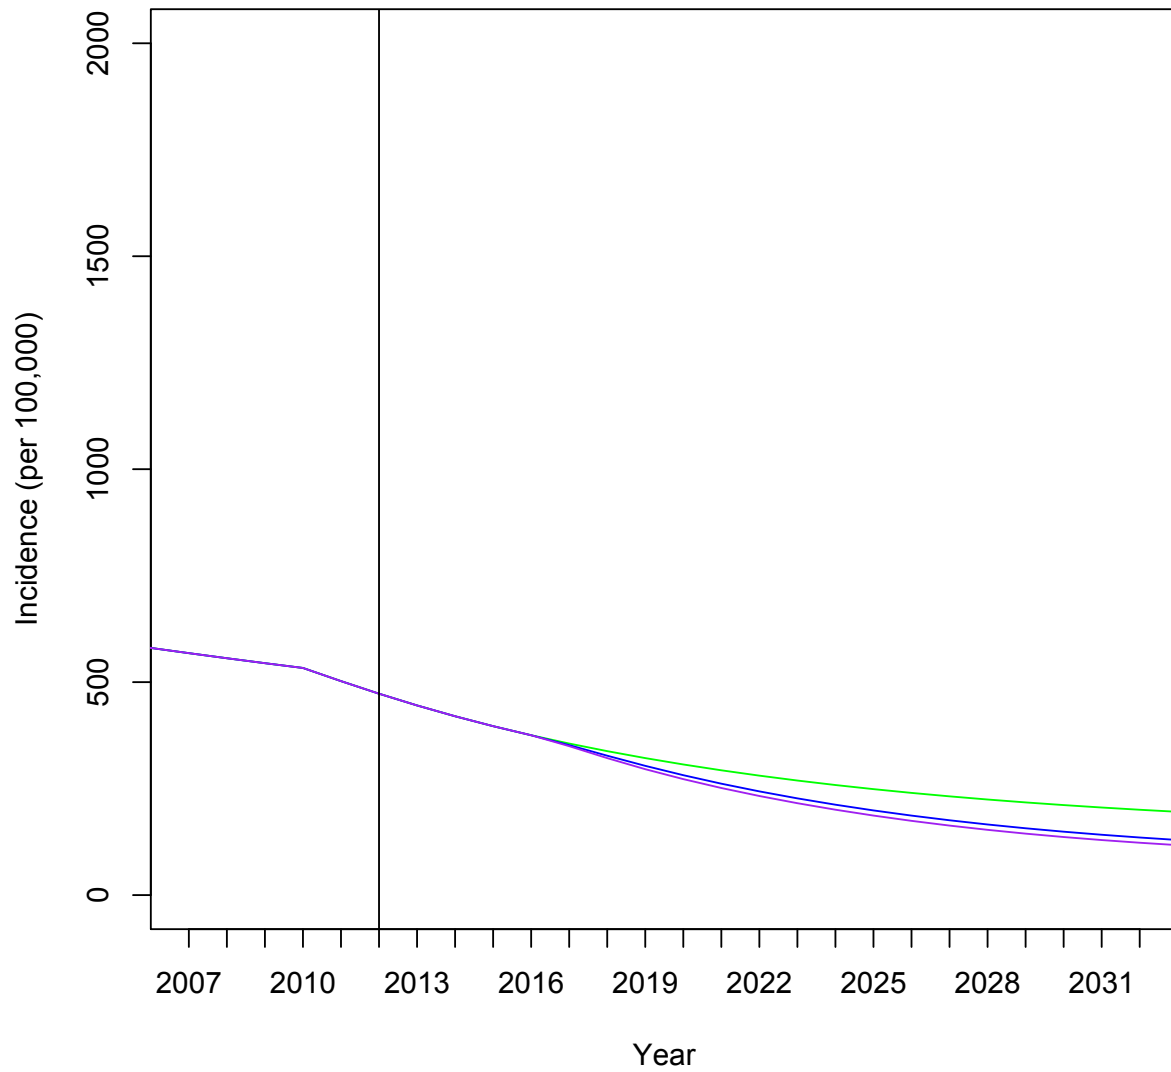

*Figure S12: Conditions under which TB incidence could increase as a result of expanded IPT*

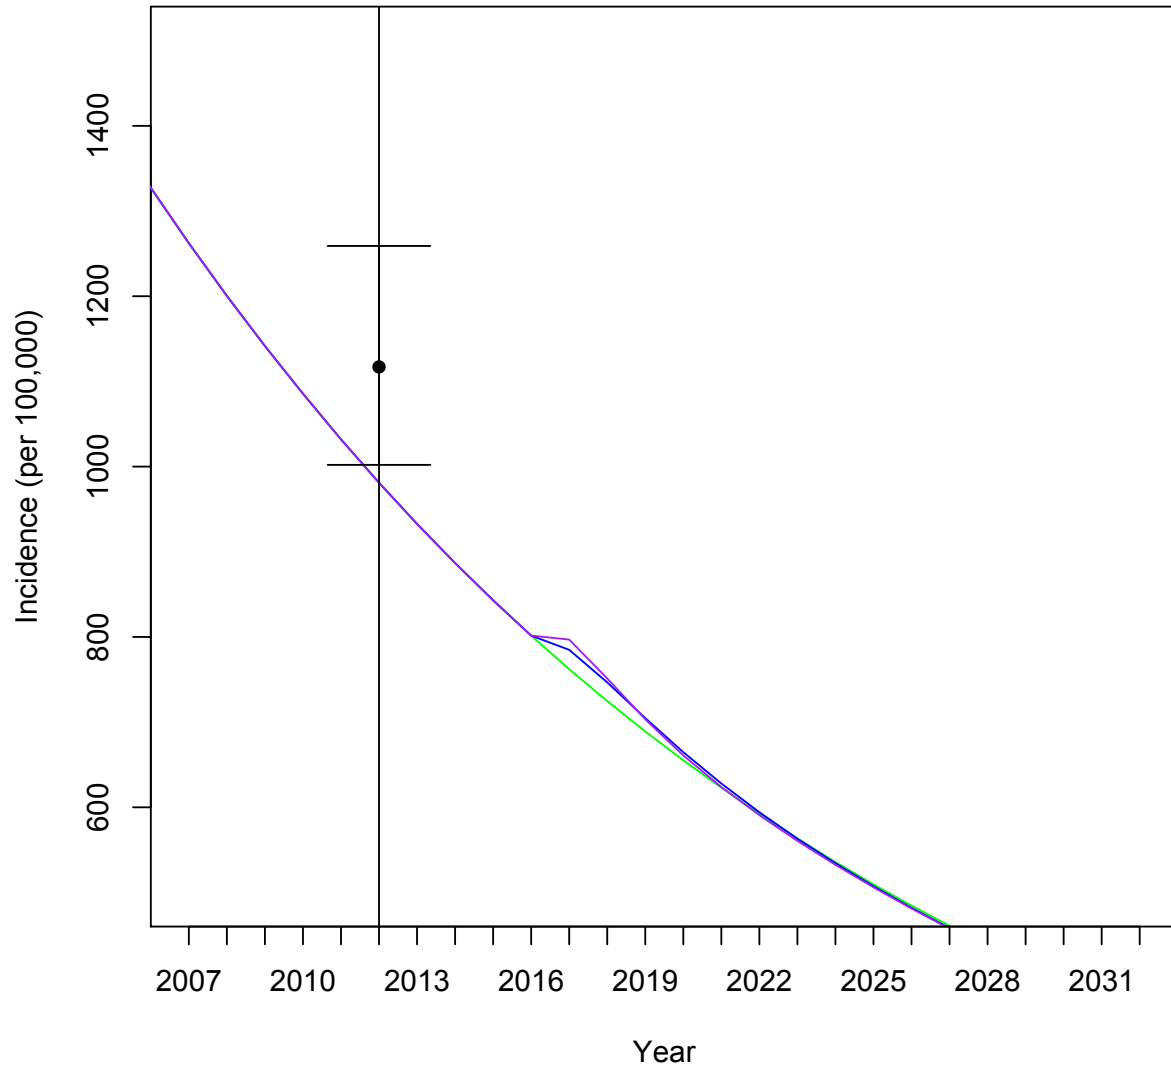



**Figure S13: Impact of IPT access by demographic group**

This figure compares the impact on general population TB incidence of IPT access in A) adolescents only, B) adults only, C) both adolescents and adults

A) Population level TB incidence in response to IPT access in adolescents only

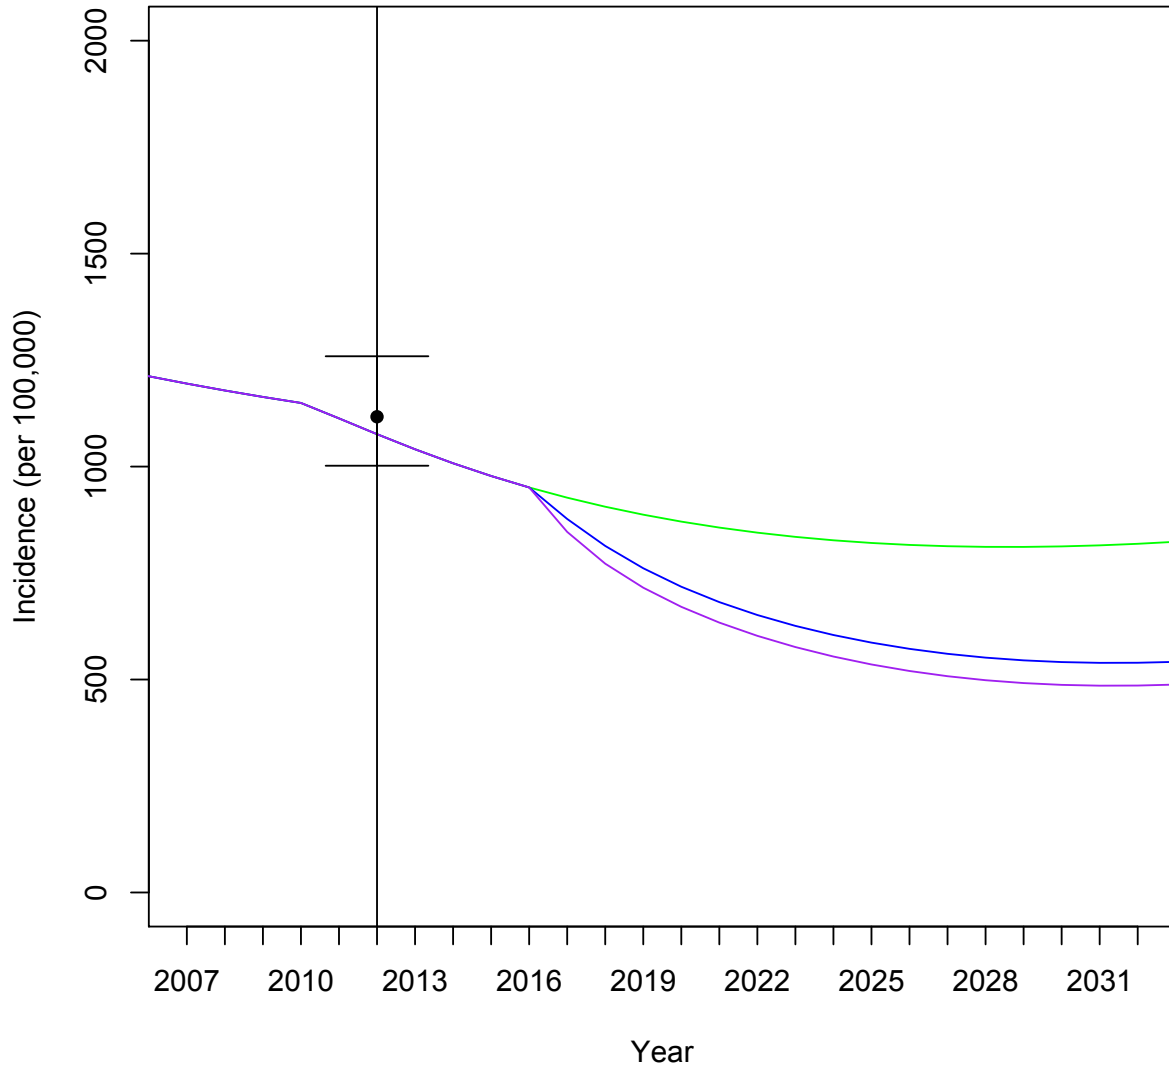

B) Population level TB incidence in response to IPT access in adults only

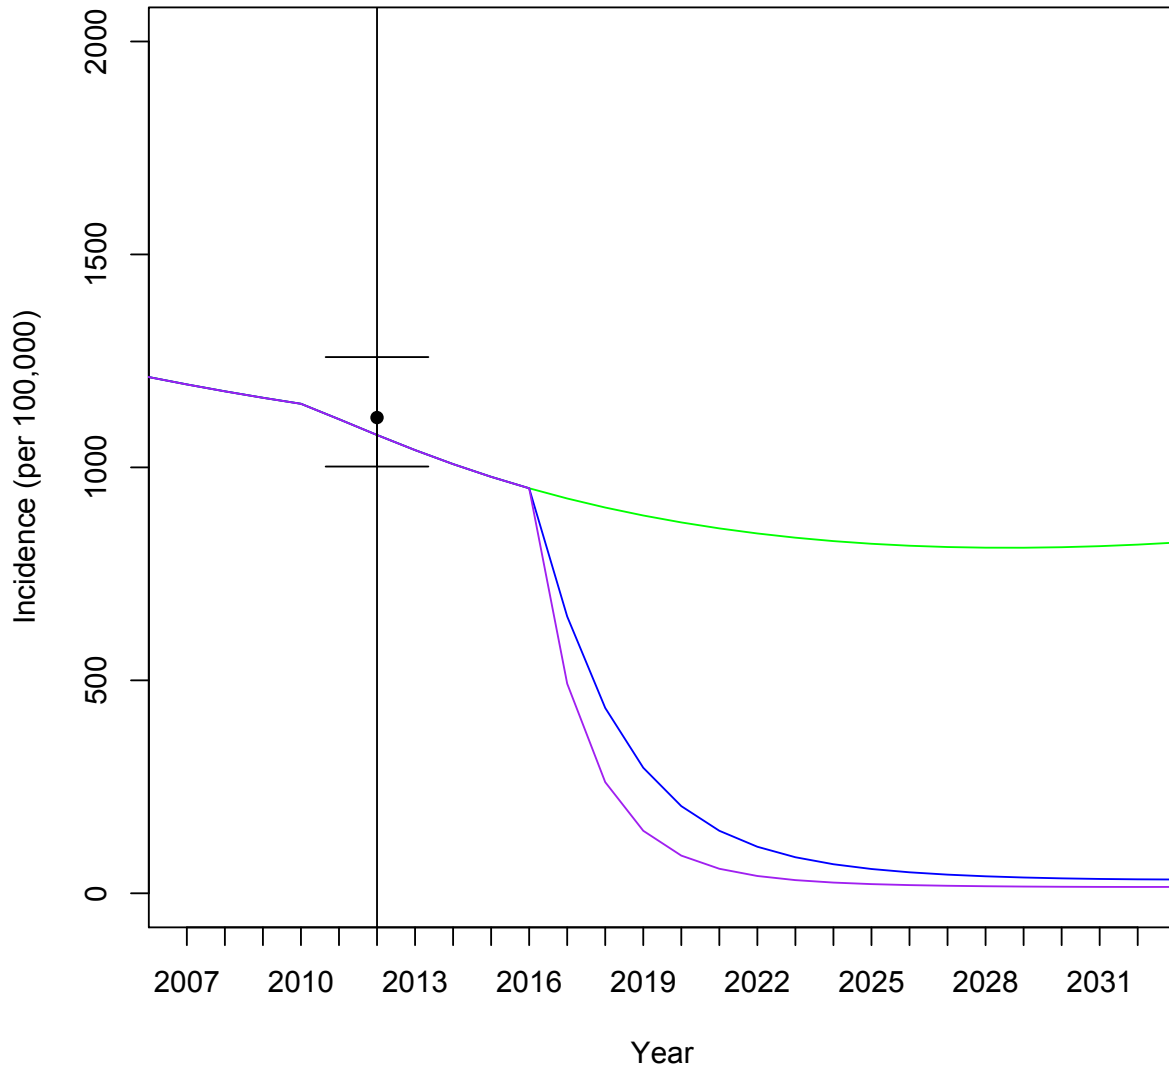

C) Population level TB incidence in response to IPT access in both adolescents and adults

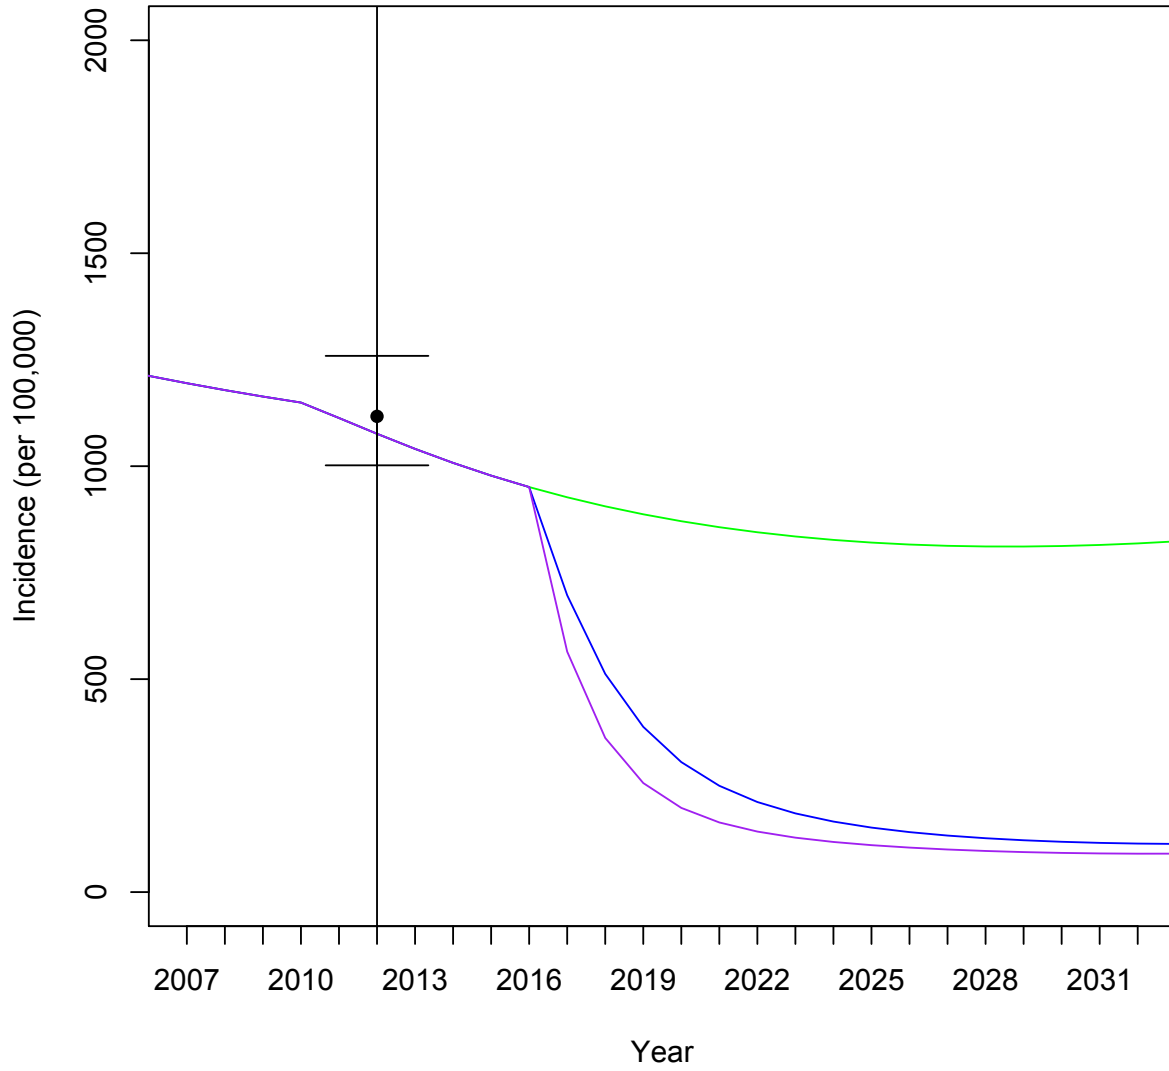



## B) TB transmission rate versus stopping IPT

### Rate of Stopping IPT

#### TB Transmission Rate

0.05

0.1

0.15

0.0000001

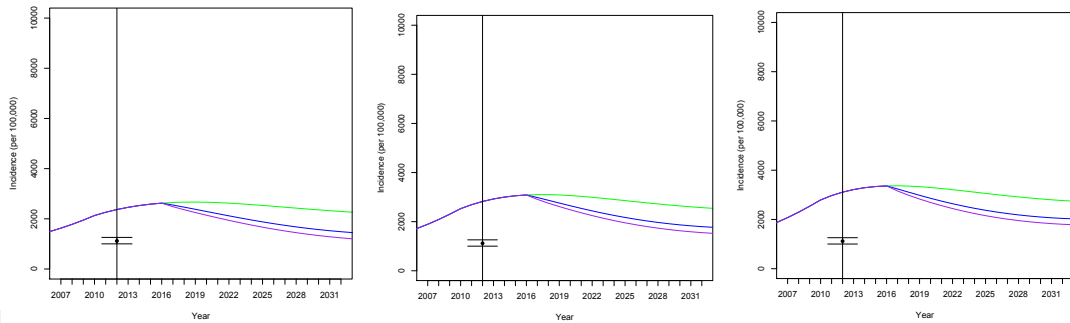

0.0000002

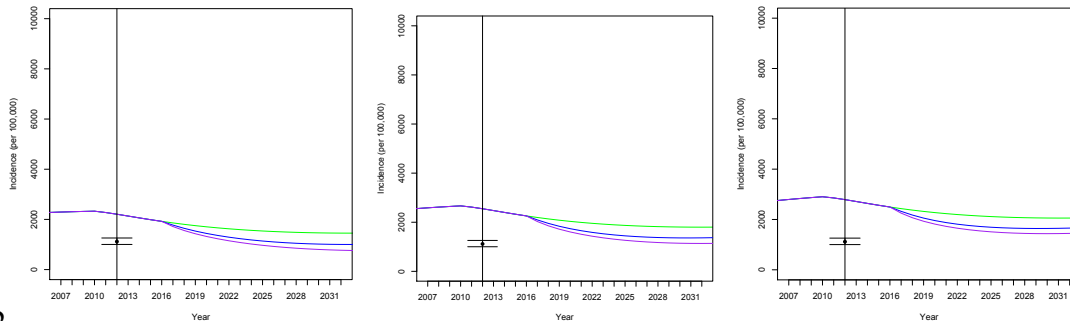

0.0000003

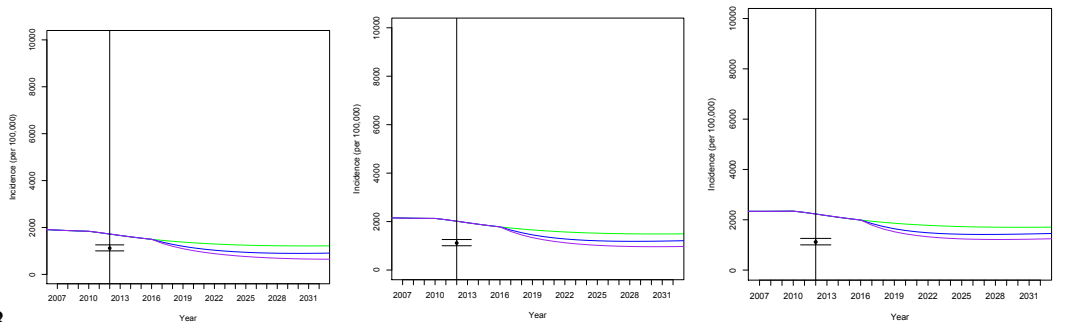

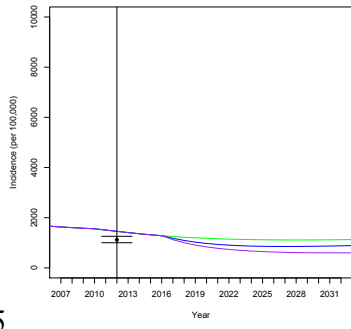

0.0000005

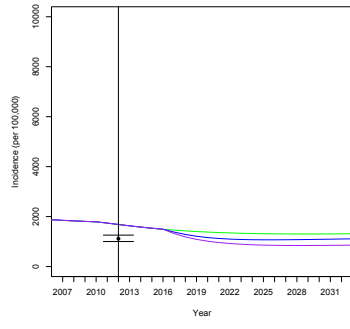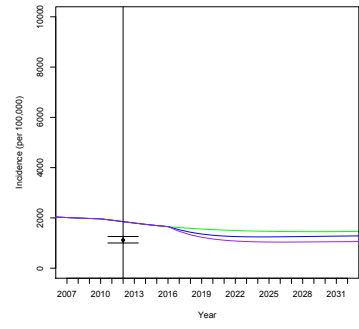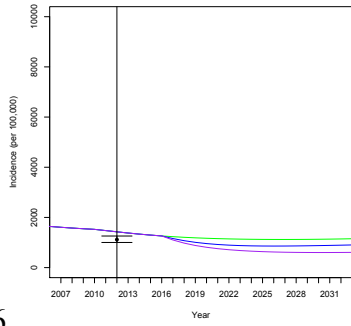

0.0000006

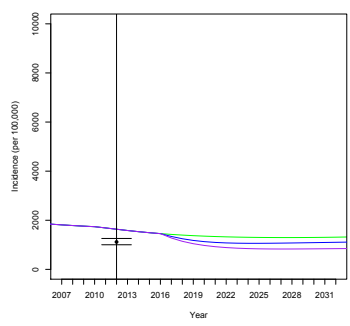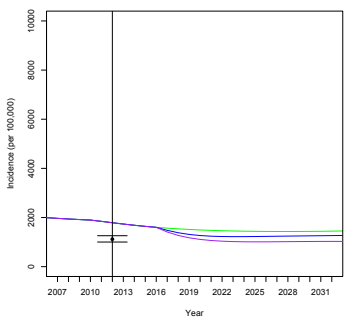

**Figure S15: Effects of IPT in adolescents on various demographic groups**

This figure shows the impact of IPT access in adolescents on TB incidence in A) adolescents, and B) adults

A) Impact of IPT access in adolescents on TB incidence in adolescents

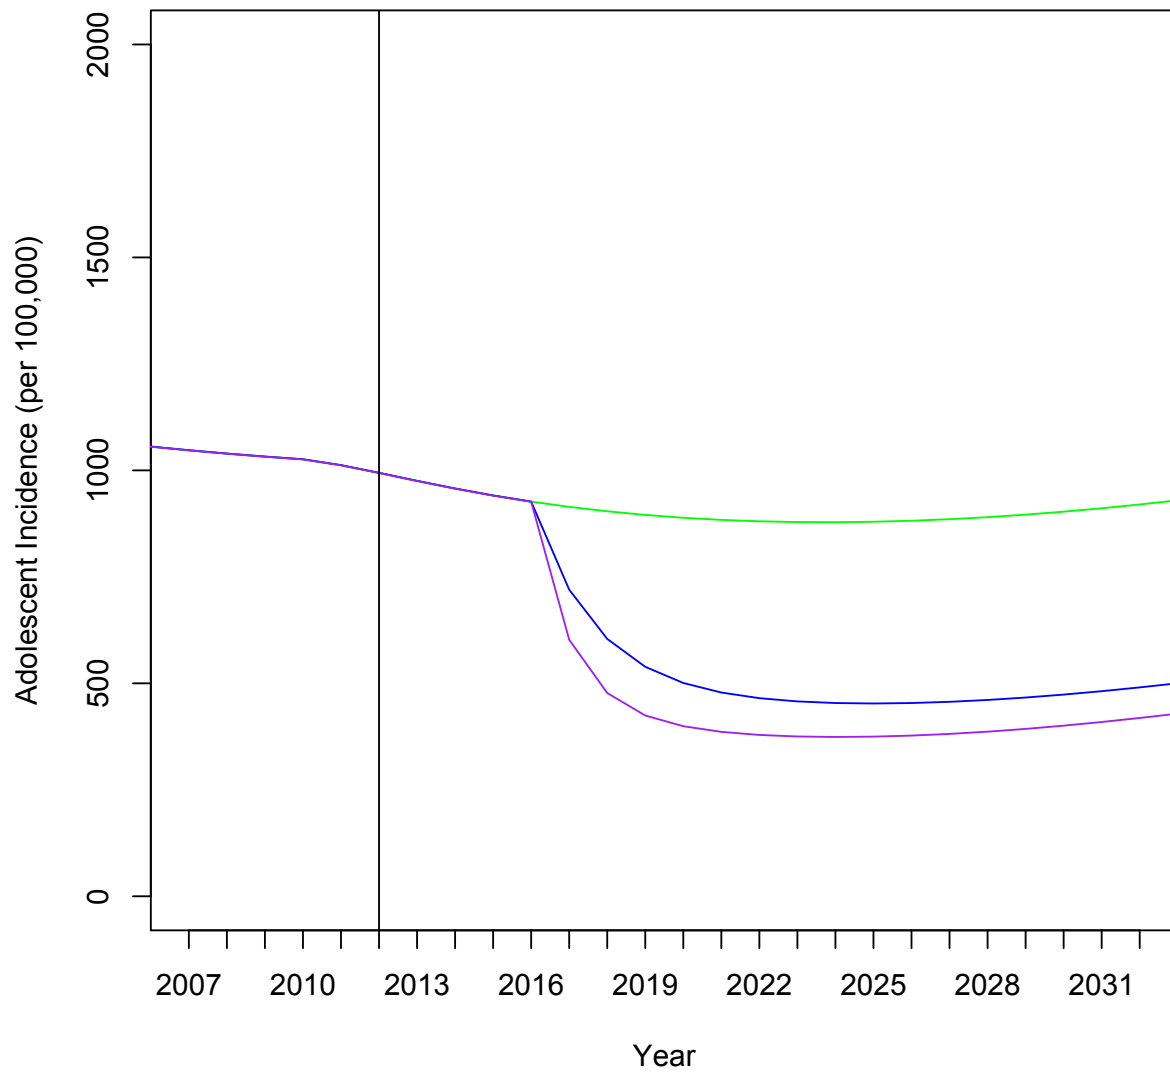

B) Impact of IPT access in adolescents on TB incidence in adults

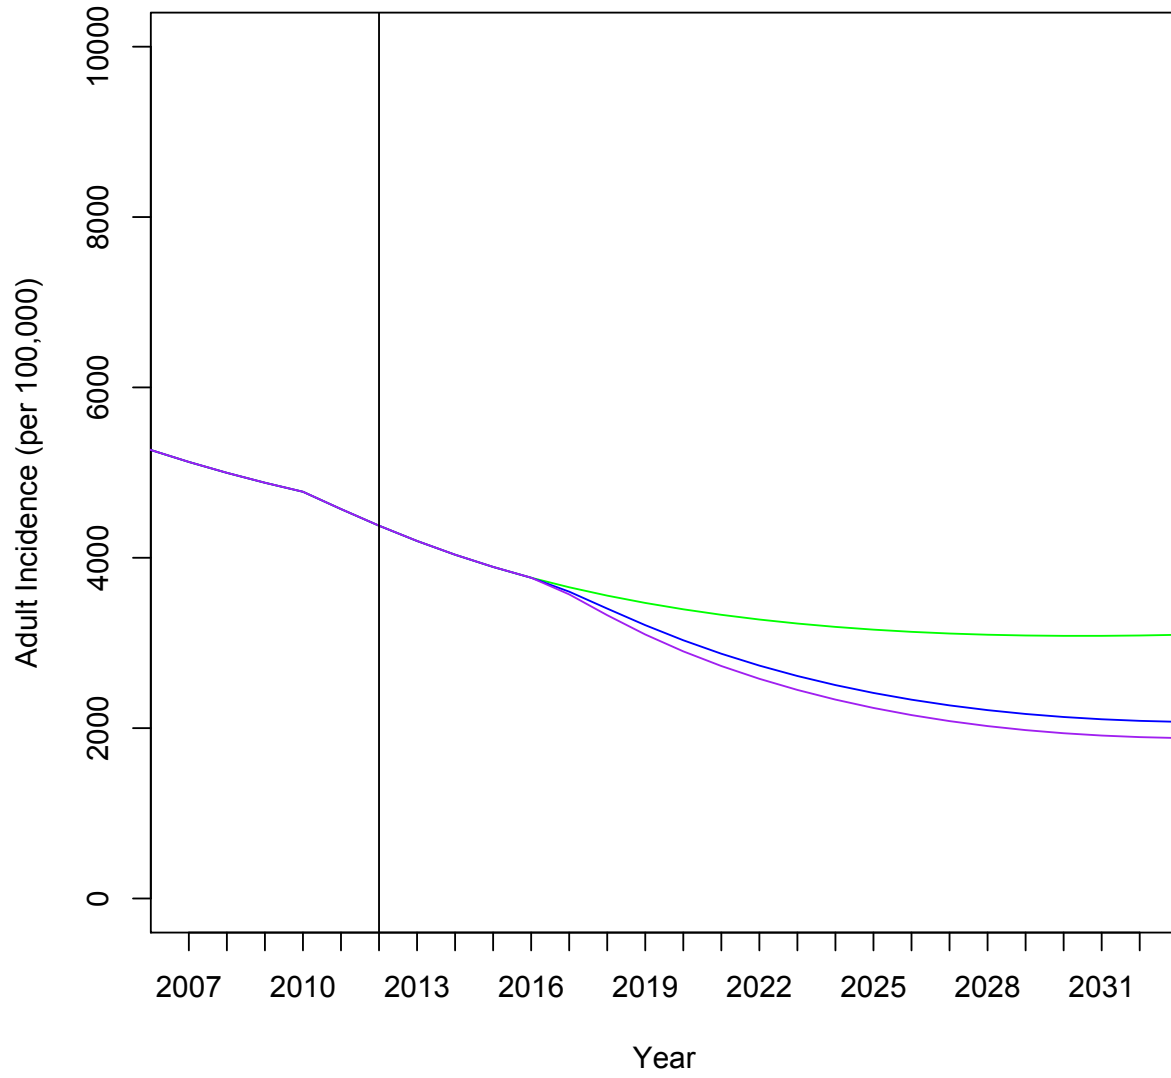



## Equations

### Children

$$\begin{aligned}
 dS_C = & v*(S_C + I_C + S_{AdoHIVn} + S_{AdoPreART} + S_{AdoARTelig} + S_{AdoOnARTCD4low} + S_{AdoOnARTCD4high} + \\
 & L_{nottreatedAdoHIVn} + L_{nottreatedAdoPreART} + L_{nottreatedAdoARTelig} + L_{nottreatedAdoOnARTCD4low} + \\
 & L_{nottreatedAdoOnARTCD4high} + L_{IPTAdoHIVn} + L_{IPTAdoPreART} + L_{IPTAdoARTelig} + L_{IPTAdoOnARTCD4low} + \\
 & L_{IPTAdoOnARTCD4high} + I_{nottreatedAdoHIVn} + I_{nottreatedAdoPreART} + I_{nottreatedAdoARTelig} + \\
 & I_{nottreatedAdoOnARTCD4low} + I_{nottreatedAdoOnARTCD4high} + I_{CTAdoHIVn} + I_{CTAdoPreART} + I_{CTAdoARTelig} + \\
 & I_{CTAdoOnARTCD4low} + I_{CTAdoOnARTCD4high} + S_{AdIHIVn} + S_{AdlPreART} + S_{AdlARTelig} + S_{AdlOnARTCD4low} + \\
 & S_{AdlOnARTCD4high} + L_{nottreatedAdlHIVn} + L_{nottreatedAdlPreART} + L_{nottreatedAdlARTelig} + L_{nottreatedAdlOnARTCD4low} \\
 & + L_{nottreatedAdlOnARTCD4high} + L_{IPTAdIHIVn} + L_{IPTAdlPreART} + L_{IPTAdlARTelig} + L_{IPTAdlOnARTCD4low} + \\
 & L_{IPTAdlOnARTCD4high} + I_{nottreatedAdlHIVn} + I_{nottreatedAdlPreART} + I_{nottreatedAdlARTelig} + I_{nottreatedAdlOnARTCD4low} \\
 & + I_{nottreatedAdlOnARTCD4high} + I_{CTAdIHIVn} + I_{CTAdlPreART} + I_{CTAdlARTelig} + I_{CTAdlOnARTCD4low} + \\
 & I_{CTAdlOnARTCD4high} + I_{FNAdoHIVn} + I_{FNAdoPreART} + I_{FNAdoARTelig} + I_{FNAdoOnARTCD4low} + I_{FNAdoOnARTCD4high} \\
 & + I_{IPTAdoHIVn} + I_{IPTAdoPreART} + I_{IPTAdoARTelig} + I_{IPTAdoOnARTCD4low} + I_{IPTAdoOnARTCD4high} + I_{FNAdIHIVn} + \\
 & I_{FNAdlPreART} + I_{FNAdlARTelig} + I_{FNAdlOnARTCD4low} + I_{FNAdlOnARTCD4high} + I_{IPTAdIHIVn} + I_{IPTAdlPreART} + \\
 & I_{IPTAdlARTelig} + I_{IPTAdlOnARTCD4low} + I_{IPTAdlOnARTCD4high} + R_{AdoHIVn} + R_{AdoPreART} + R_{AdoARTelig} + \\
 & R_{AdoOnARTCD4low} + R_{AdoOnARTCD4high} + R_{AdIHIVn} + R_{AdlPreART} + R_{AdlARTelig} + R_{AdlOnARTCD4low} + \\
 & R_{AdlOnARTCD4high}) - \beta_{TBchi} * \\
 & (S_C*((I_{nottreatedAdoHIVn} + I_{nottreatedAdoPreART} + I_{nottreatedAdoARTelig} + I_{nottreatedAdoOnARTCD4low} + I_{nottreatedAdoOnARTCD4high} + \\
 & I_{nottreatedAdlHIVn} + I_{nottreatedAdlPreART} + I_{nottreatedAdlARTelig} + I_{nottreatedAdlOnARTCD4low} + I_{nottreatedAdlOnARTCD4high} + \\
 & I_{FNAdoHIVn} + I_{FNAdoPreART} + I_{FNAdoARTelig} + I_{FNAdoOnARTCD4low} + I_{FNAdoOnARTCD4high} + I_{IPTAdoHIVn} \\
 & + I_{IPTAdoPreART} + I_{IPTAdoARTelig} + I_{IPTAdoOnARTCD4low} + I_{IPTAdoOnARTCD4high} + I_{FNAdIHIVn} + I_{FNAdlPreART} + \\
 & I_{FNAdlARTelig} + I_{FNAdlOnARTCD4low} + I_{FNAdlOnARTCD4high} + I_{IPTAdIHIVn} + I_{IPTAdlPreART} + I_{IPTAdlARTelig} + \\
 & I_{IPTAdlOnARTCD4low} + I_{IPTAdlOnARTCD4high}))) - \delta * S_C - \mu_{chi} * S_C
 \end{aligned}$$

$$\begin{aligned}
 dI_C = & \beta_{TBchi} * (S_C * ((I_{nottreatedAdoHIVn} + I_{nottreatedAdoPreART} + I_{nottreatedAdoARTelig} + I_{nottreatedAdoOnARTCD4low} \\
 & + I_{nottreatedAdoOnARTCD4high} + I_{nottreatedAdlHIVn} + I_{nottreatedAdlPreART} + I_{nottreatedAdlARTelig} + \\
 & I_{nottreatedAdlOnARTCD4low} + I_{nottreatedAdlOnARTCD4high} + I_{FNAdoHIVn} + I_{FNAdoPreART} + I_{FNAdoARTelig} + \\
 & I_{FNAdoOnARTCD4low} + I_{FNAdoOnARTCD4high} + I_{IPTAdoHIVn} + I_{IPTAdoPreART} + I_{IPTAdoARTelig} + \\
 & I_{IPTAdoOnARTCD4low} + I_{IPTAdoOnARTCD4high} + I_{FNAdIHIVn} + I_{FNAdlPreART} + I_{FNAdlARTelig} + I_{FNAdlOnARTCD4low} \\
 & + I_{FNAdlOnARTCD4high} + I_{IPTAdIHIVn} + I_{IPTAdlPreART} + I_{IPTAdlARTelig} + I_{IPTAdlOnARTCD4low} + \\
 & I_{IPTAdlOnARTCD4high}))) - \delta * I_C - \mu_{chiInf} * I_C
 \end{aligned}$$

## Adolescents

$$\begin{aligned}
dS_{\text{AdoHIVn}} = & v * S_{\text{Child}} - S_{\text{AdoHIVn}} * \beta_{\text{HIVInfAdo}} * ((S_{\text{AdoPreART}} + S_{\text{AdoARTelig}} + L_{\text{nottreatedAdoPreART}} + \\
& L_{\text{nottreatedAdoARTelig}} + L_{\text{IPTAdoPreART}} + L_{\text{IPTAdoARTelig}} + I_{\text{nottreatedAdoPreART}} + I_{\text{nottreatedAdoARTelig}} + \\
& I_{\text{CTAdoPreART}} + I_{\text{CTAdoARTelig}} + S_{\text{AdlPreART}} + S_{\text{AdlARTelig}} + L_{\text{nottreatedAdlPreART}} + L_{\text{nottreatedAdlARTelig}} + \\
& L_{\text{IPTAdlPreART}} + L_{\text{IPTAdlARTelig}} + I_{\text{nottreatedAdlPreART}} + I_{\text{nottreatedAdlARTelig}} + I_{\text{CTAdlPreART}} + I_{\text{CTAdlARTelig}} + \\
& I_{\text{FNAdoPreART}} + I_{\text{FNAdoARTelig}} + I_{\text{IPTAdoPreART}} + I_{\text{IPTAdoARTelig}} + I_{\text{FNAdlPreART}} + I_{\text{FNAdlARTelig}} + I_{\text{IPTAdlPreART}} \\
& + I_{\text{IPTAdlARTelig}} + R_{\text{AdoPreART}} + R_{\text{AdoARTelig}}) - \\
& \beta_{\text{TBado}} * S_{\text{AdoHIVn}} * ((I_{\text{nottreatedAdoHIVn}} + I_{\text{nottreatedAdoPreART}} + I_{\text{nottreatedAdoARTelig}} + I_{\text{nottreatedAdoOnARTCD4low}} + I_{\text{nottreat}} \\
& \text{atedAdoOnARTCD4high}} + I_{\text{nottreatedAdlHIVn}} + I_{\text{nottreatedAdlPreART}} + I_{\text{nottreatedAdlARTelig}} + I_{\text{nottreatedAdlOnARTCD4low}} + I_{\text{nottreat}} \\
& \text{edAdlOnARTCD4high}} + I_{\text{FNAdoHIVn}} + I_{\text{FNAdoPreART}} + I_{\text{FNAdoARTelig}} + I_{\text{FNAdoOnARTCD4low}} + I_{\text{FNAdoOnARTCD4high}} \\
& + I_{\text{IPTAdoHIVn}} + I_{\text{IPTAdoPreART}} + I_{\text{IPTAdoARTelig}} + I_{\text{IPTAdoOnARTCD4low}} + I_{\text{IPTAdoOnARTCD4high}} + I_{\text{FNAdlHIVn}} + \\
& I_{\text{FNAdlPreART}} + I_{\text{FNAdlARTelig}} + I_{\text{FNAdlOnARTCD4low}} + I_{\text{FNAdlOnARTCD4high}} + I_{\text{IPTAdlHIVn}} + I_{\text{IPTAdlPreART}} + \\
& I_{\text{IPTAdlARTelig}} + I_{\text{IPTAdlOnARTCD4low}} + I_{\text{IPTAdlOnARTCD4high}})) + \gamma_{\text{CT}} * I_{\text{CTAdoHIVn}} + \kappa_{\text{IPT}} * R_{\text{AdoHIVn}} - \\
& \mu_{\text{ado}} * S_{\text{AdoHIVn}} - \varepsilon * S_{\text{AdoHIVn}}
\end{aligned}$$

$$\begin{aligned}
dS_{\text{AdoPreART}} = & S_{\text{AdoHIVn}} * \beta_{\text{HIVInfAdo}} * ((S_{\text{AdoPreART}} + S_{\text{AdoARTelig}} + L_{\text{nottreatedAdoPreART}} + L_{\text{nottreatedAdoARTelig}} \\
& + L_{\text{IPTAdoPreART}} + L_{\text{IPTAdoARTelig}} + I_{\text{nottreatedAdoPreART}} + I_{\text{nottreatedAdoARTelig}} + I_{\text{CTAdoPreART}} + I_{\text{CTAdoARTelig}} \\
& + S_{\text{AdlPreART}} + S_{\text{AdlARTelig}} + L_{\text{nottreatedAdlPreART}} + L_{\text{nottreatedAdlARTelig}} + L_{\text{IPTAdlPreART}} + L_{\text{IPTAdlARTelig}} + \\
& I_{\text{nottreatedAdlPreART}} + I_{\text{nottreatedAdlARTelig}} + I_{\text{CTAdlPreART}} + I_{\text{CTAdlARTelig}} + I_{\text{FNAdoPreART}} + I_{\text{FNAdoARTelig}} + \\
& I_{\text{IPTAdoPreART}} + I_{\text{IPTAdoARTelig}} + I_{\text{FNAdlPreART}} + I_{\text{FNAdlARTelig}} + I_{\text{IPTAdlPreART}} + I_{\text{IPTAdlARTelig}} + R_{\text{AdoPreART}} \\
& + R_{\text{AdoARTelig}}) - \zeta_{\text{HIV}} * S_{\text{AdoPreART}} - \\
& \beta_{\text{TBado}} * S_{\text{AdoPreART}} * ((I_{\text{nottreatedAdoHIVn}} + I_{\text{nottreatedAdoPreART}} + I_{\text{nottreatedAdoARTelig}} + I_{\text{nottreatedAdoOnARTCD4low}} + I_{\text{nottreat}} \\
& \text{edAdoOnARTCD4high}} + I_{\text{nottreatedAdlHIVn}} + I_{\text{nottreatedAdlPreART}} + I_{\text{nottreatedAdlARTelig}} + I_{\text{nottreatedAdlOnARTCD4low}} + I_{\text{nottreat}} \\
& \text{edAdlOnARTCD4high}} + I_{\text{FNAdoHIVn}} + I_{\text{FNAdoPreART}} + I_{\text{FNAdoARTelig}} + I_{\text{FNAdoOnARTCD4low}} + \\
& I_{\text{FNAdoOnARTCD4high}} + I_{\text{IPTAdoHIVn}} + I_{\text{IPTAdoPreART}} + I_{\text{IPTAdoARTelig}} + I_{\text{IPTAdoOnARTCD4low}} + \\
& I_{\text{IPTAdoOnARTCD4high}} + I_{\text{FNAdlHIVn}} + I_{\text{FNAdlPreART}} + I_{\text{FNAdlARTelig}} + I_{\text{FNAdlOnARTCD4low}} + I_{\text{FNAdlOnARTCD4high}} \\
& + I_{\text{IPTAdlHIVn}} + I_{\text{IPTAdlPreART}} + I_{\text{IPTAdlARTelig}} + I_{\text{IPTAdlOnARTCD4low}} + I_{\text{IPTAdlOnARTCD4high}})) + \gamma_{\text{CT}} \\
& * I_{\text{CTAdoPreART}} + \kappa_{\text{IPT}} * R_{\text{AdoPreART}} - \mu_{\text{PreARTado}} * S_{\text{AdoPreART}} - \varepsilon * S_{\text{AdoPreART}}
\end{aligned}$$

$$\begin{aligned}
dS_{\text{AdoARTelig}} = & \zeta_{\text{HIV}} * S_{\text{AdoPreART}} - \eta_{\text{HIV}} * S_{\text{AdoARTelig}} - \\
& \beta_{\text{TBado}} * S_{\text{AdoARTelig}} * ((I_{\text{nottreatedAdoHIVn}} + I_{\text{nottreatedAdoPreART}} + I_{\text{nottreatedAdoARTelig}} + I_{\text{nottreatedAdoOnARTCD4low}} + I_{\text{not}} \\
& \text{treatedAdoOnARTCD4high}} + I_{\text{nottreatedAdlHIVn}} + I_{\text{nottreatedAdlPreART}} + I_{\text{nottreatedAdlARTelig}} + I_{\text{nottreatedAdlOnARTCD4low}} + I_{\text{nottreat}} \\
& \text{edAdlOnARTCD4high}} + I_{\text{FNAdoHIVn}} + I_{\text{FNAdoPreART}} + I_{\text{FNAdoARTelig}} + I_{\text{FNAdoOnARTCD4low}} + \\
& I_{\text{FNAdoOnARTCD4high}} + I_{\text{IPTAdoHIVn}} + I_{\text{IPTAdoPreART}} + I_{\text{IPTAdoARTelig}} + I_{\text{IPTAdoOnARTCD4low}} + \\
& I_{\text{IPTAdoOnARTCD4high}} + I_{\text{FNAdlHIVn}} + I_{\text{FNAdlPreART}} + I_{\text{FNAdlARTelig}} + I_{\text{FNAdlOnARTCD4low}} + I_{\text{FNAdlOnARTCD4high}} \\
& + I_{\text{IPTAdlHIVn}} + I_{\text{IPTAdlPreART}} + I_{\text{IPTAdlARTelig}} + I_{\text{IPTAdlOnARTCD4low}} + I_{\text{IPTAdlOnARTCD4high}})) +
\end{aligned}$$

$$\gamma_{CT} * I_{CTAdoARTelig} + \kappa_{IPT} * R_{AdoARTelig} - \mu_{ARTeligAdo} * S_{AdoARTelig} - \epsilon * S_{AdoARTelig}$$

$$\begin{aligned} dS_{AdoOnARTCD4low} = & \eta_{HIV} * S_{AdoARTelig} - \theta_{HIV} * S_{AdoOnARTCD4low} - \\ & \beta_{TBado} * S_{AdoOnARTCD4low} * ((I_{nottreatedAdoHIVn} + I_{nottreatedAdoPreART} + I_{nottreatedAdoARTelig} + I_{nottreatedAdoOnARTCD4low} \\ & + I_{nottreatedAdoOnARTCD4high} + I_{nottreatedAdIHIVn} + I_{nottreatedAdlPreART} + I_{nottreatedAdlARTelig} + I_{nottreatedAdlOnARTCD4low} \\ & + I_{nottreatedAdlOnARTCD4high} + I_{FNAdoHIVn} + I_{FNAdoPreART} + I_{FNAdoARTelig} + I_{FNAdoOnARTCD4low} + \\ & I_{FNAdoOnARTCD4high} + I_{IPTAdoHIVn} + I_{IPTAdoPreART} + I_{IPTAdoARTelig} + I_{IPTAdoOnARTCD4low} + \\ & I_{IPTAdoOnARTCD4high} + I_{FNAdIHIVn} + I_{FNAdlPreART} + I_{FNAdlARTelig} + I_{FNAdlOnARTCD4low} + I_{FNAdlOnARTCD4high} \\ & + I_{IPTAdIHIVn} + I_{IPTAdlPreART} + I_{IPTAdlARTelig} + I_{IPTAdlOnARTCD4low} + I_{IPTAdlOnARTCD4high})) + \\ & \gamma_{CT} * I_{CTAdoOnARTCD4low} + \kappa_{IPT} * R_{AdoOnARTCD4low} - \mu_{ARTlowAdo} * S_{AdoOnARTCD4low} - \epsilon * S_{AdoOnARTCD4low} \end{aligned}$$

$$\begin{aligned} dS_{AdoOnARTCD4high} = & \theta_{HIV} * S_{AdoOnARTCD4low} - \\ & \beta_{TBado} * S_{AdoOnARTCD4high} * ((I_{nottreatedAdoHIVn} + I_{nottreatedAdoPreART} + I_{nottreatedAdoARTelig} + I_{nottreatedAdoOnARTCD4low} \\ & + I_{nottreatedAdoOnARTCD4high} + I_{nottreatedAdIHIVn} + I_{nottreatedAdlPreART} + I_{nottreatedAdlARTelig} + I_{nottreatedAdlOnARTCD4low} \\ & + I_{nottreatedAdlOnARTCD4high} + I_{FNAdoHIVn} + I_{FNAdoPreART} + I_{FNAdoARTelig} + I_{FNAdoOnARTCD4low} + \\ & I_{FNAdoOnARTCD4high} + I_{IPTAdoHIVn} + I_{IPTAdoPreART} + I_{IPTAdoARTelig} + I_{IPTAdoOnARTCD4low} + \\ & I_{IPTAdoOnARTCD4high} + I_{FNAdIHIVn} + I_{FNAdlPreART} + I_{FNAdlARTelig} + I_{FNAdlOnARTCD4low} + I_{FNAdlOnARTCD4high} \\ & + I_{IPTAdIHIVn} + I_{IPTAdlPreART} + I_{IPTAdlARTelig} + I_{IPTAdlOnARTCD4low} + I_{IPTAdlOnARTCD4high})) + \\ & \gamma_{CT} * I_{CTAdoOnARTCD4high} + \mu_{PT} * R_{AdoOnARTCD4high} - \mu_{ARTHhighAdo} * S_{AdoOnARTCD4high} - \epsilon * S_{AdoOnARTCD4high} \end{aligned}$$

$$\begin{aligned} dR_{AdoHIVn} = & -R_{AdoHIVn} * \beta_{HIVInfAdo} * ((S_{AdoPreART} + S_{AdoARTelig} + L_{nottreatedAdoPreART} + L_{nottreatedAdoARTelig} \\ & + L_{IPTAdoPreART} + L_{IPTAdoARTelig} + I_{nottreatedAdoPreART} + I_{nottreatedAdoARTelig} + I_{CTAdoPreART} + I_{CTAdoARTelig} \\ & + S_{AdlPreART} + S_{AdlARTelig} + L_{nottreatedAdlPreART} + L_{nottreatedAdlARTelig} + L_{IPTAdlPreART} + L_{IPTAdlARTelig} + \\ & I_{nottreatedAdlPreART} + I_{nottreatedAdlARTelig} + I_{CTAdlPreART} + I_{CTAdlARTelig} + I_{FNAdoPreART} + I_{FNAdoARTelig} + \\ & I_{IPTAdoPreART} + I_{IPTAdoARTelig} + I_{FNAdlPreART} + I_{FNAdlARTelig} + I_{IPTAdlPreART} + I_{IPTAdlARTelig} + R_{AdoPreART} \\ & + R_{AdoARTelig})) + \gamma_{IPT} * L_{IPTAdoHIVn} - \kappa_{IPT} * R_{AdoHIVn} - \epsilon * R_{AdoHIVn} - \mu_{ado} * R_{AdoHIVn} \end{aligned}$$

$$\begin{aligned} dR_{AdoPreART} = & R_{AdoHIVn} * \beta_{HIVInfAdo} * ((S_{AdoPreART} + S_{AdoARTelig} + L_{nottreatedAdoPreART} + \\ & L_{nottreatedAdoARTelig} + L_{IPTAdoPreART} + L_{IPTAdoARTelig} + I_{nottreatedAdoPreART} + I_{nottreatedAdoARTelig} + \\ & I_{CTAdoPreART} + I_{CTAdoARTelig} + S_{AdlPreART} + S_{AdlARTelig} + L_{nottreatedAdlPreART} + L_{nottreatedAdlARTelig} + \\ & L_{IPTAdlPreART} + L_{IPTAdlARTelig} + I_{nottreatedAdlPreART} + I_{nottreatedAdlARTelig} + I_{CTAdlPreART} + I_{CTAdlARTelig} + \\ & I_{FNAdoPreART} + I_{FNAdoARTelig} + I_{IPTAdoPreART} + I_{IPTAdoARTelig} + I_{FNAdlPreART} + I_{FNAdlARTelig} + I_{IPTAdlPreART} \\ & + I_{IPTAdlARTelig} + R_{AdoPreART} + R_{AdoARTelig})) - \zeta_{HIV} * R_{AdoPreART} + \gamma_{IPT} * L_{IPTAdoPreART} - \kappa_{IPT} * R_{AdoPreART} \\ & - \epsilon * R_{AdoPreART} - \mu_{PreARTAdo} * R_{AdoPreART} \end{aligned}$$

$$dR_{AdoARTelig} = \zeta_{HIV} * R_{AdoPreART} - \eta_{HIV} * R_{AdoARTelig} + \gamma_{IPT} * L_{IPTAdoARTelig} - \kappa_{IPT} * R_{AdoARTelig} - \varepsilon * R_{AdoARTelig} - \mu_{ARTeligAdo} * R_{AdoARTelig}$$

$$dR_{AdoOnARTCD4low} = \eta_{HIV} * R_{AdoARTelig} - \theta_{HIV} * R_{AdoOnARTCD4low} + \gamma_{IPT} * L_{IPTAdoOnARTCD4low} - \kappa_{IPT} * R_{AdoOnARTCD4low} - \varepsilon * R_{AdoOnARTCD4low} - \mu_{ARTlowAdo} * R_{AdoOnARTCD4low}$$

$$dR_{AdoOnARTCD4high} = \theta_{HIV} * R_{AdoOnARTCD4low} + \gamma_{IPT} * L_{IPTAdoOnARTCD4high} - \kappa_{IPT} * R_{AdoOnARTCD4high} - \varepsilon * R_{AdoOnARTCD4high} - \mu_{ARThighAdo} * R_{AdoOnARTCD4high}$$

$$\begin{aligned} dL_{nottreatedAdoHIVn} = & \varepsilon * I_{Child} - L_{nottreatedAdoHIVn} * \beta_{HIVInfAdo} * ((S_{AdoPreART} + S_{AdoARTelig} + L_{nottreatedAdoPreART} \\ & + L_{nottreatedAdoARTelig} + L_{IPTAdoPreART} + L_{IPTAdoARTelig} + I_{nottreatedAdoPreART} + I_{nottreatedAdoARTelig} + \\ & I_{CTAdoPreART} + I_{CTAdoARTelig} + S_{AdlPreART} + S_{AdlARTelig} + L_{nottreatedAdlPreART} + L_{nottreatedAdlARTelig} + \\ & L_{IPTAdlPreART} + L_{IPTAdlARTelig} + I_{nottreatedAdlPreART} + I_{nottreatedAdlARTelig} + I_{CTAdlPreART} + I_{CTAdlARTelig} + \\ & I_{FNAdoPreART} + I_{FNAdoARTelig} + I_{IPTAdoPreART} + I_{IPTAdoARTelig} + I_{FNAdlPreART} + I_{FNAdlARTelig} + I_{IPTAdlPreART} \\ & + I_{IPTAdlARTelig} + R_{AdoPreART} + R_{AdoARTelig})) - \zeta_{AdoHIVn} * L_{nottreatedAdoHIVn} + \\ & \beta_{TBAdo} * \rho_{TBinfHIVn} * S_{AdoHIVn} * ((I_{nottreatedAdoHIVn} + I_{nottreatedAdoPreART} + I_{nottreatedAdoARTelig} + I_{nottreatedAdoOnARTCD4low} \\ & + I_{nottreatedAdoOnARTCD4high} + I_{nottreatedAdlHIVn} + I_{nottreatedAdlPreART} + I_{nottreatedAdlARTelig} + I_{nottreatedAdlOnARTCD4low} \\ & + I_{nottreatedAdlOnARTCD4high} + I_{FNAdoHIVn} + I_{FNAdoPreART} + I_{FNAdoARTelig} + I_{FNAdoOnARTCD4low} + \\ & I_{FNAdoOnARTCD4high} + I_{IPTAdoHIVn} + I_{IPTAdoPreART} + I_{IPTAdoARTelig} + I_{IPTAdoOnARTCD4low} + \\ & I_{IPTAdoOnARTCD4high} + I_{FNAdlHIVn} + I_{FNAdlPreART} + I_{FNAdlARTelig} + I_{FNAdlOnARTCD4low} + I_{FNAdlOnARTCD4high} \\ & + I_{IPTAdlHIVn} + I_{IPTAdlPreART} + I_{IPTAdlARTelig} + I_{IPTAdlOnARTCD4low} + I_{IPTAdlOnARTCD4high})) - (a * (1 - \\ & \rho_{TBinfHIVn}) * \beta_{TBAdo} * L_{nottreatedAdoHIVn} * (I_{nottreatedAdoHIVn} + I_{nottreatedAdoPreART} + I_{nottreatedAdoARTelig} + I_{nottreatedAdoOnARTCD4low} \\ & + I_{nottreatedAdoOnARTCD4high} + I_{nottreatedAdlHIVn} + I_{nottreatedAdlPreART} + I_{nottreatedAdlARTelig} + I_{nottreatedAdlOnARTCD4low} \\ & + I_{nottreatedAdlOnARTCD4high} + I_{FNAdoHIVn} + I_{FNAdoPreART} + I_{FNAdoARTelig} + I_{FNAdoOnARTCD4low} + \\ & I_{FNAdoOnARTCD4high} + I_{IPTAdoHIVn} + I_{IPTAdoPreART} + I_{IPTAdoARTelig} + I_{IPTAdoOnARTCD4low} + \\ & I_{IPTAdoOnARTCD4high} + I_{FNAdlHIVn} + I_{FNAdlPreART} + I_{FNAdlARTelig} + I_{FNAdlOnARTCD4low} + I_{FNAdlOnARTCD4high} \\ & + I_{IPTAdlHIVn} + I_{IPTAdlPreART} + I_{IPTAdlARTelig} + I_{IPTAdlOnARTCD4low} + I_{IPTAdlOnARTCD4high})) + \\ & (\tau_{AdoHIVn} * L_{nottreatedAdoHIVn})) + \psi * I_{CTAdoHIVn} - \mu_{Ado} * L_{nottreatedAdoHIVn} + \upsilon_{IPT} * L_{IPTAdoHIVn} - \\ & L_{nottreatedAdoHIVn} * \vartheta_{HIVn} - \varepsilon * L_{nottreatedAdoHIVn} + \varphi * I_{nottreatedAdoHIVn} \end{aligned}$$

$$\begin{aligned} dL_{nottreatedAdoPreART} = & L_{nottreatedAdoHIVn} * \beta_{HIVInfAdo} * ((S_{AdoPreART} + S_{AdoARTelig} + L_{nottreatedAdoPreART} + \\ & L_{nottreatedAdoARTelig} + L_{IPTAdoPreART} + L_{IPTAdoARTelig} + I_{nottreatedAdoPreART} + I_{nottreatedAdoARTelig} + \\ & I_{CTAdoPreART} + I_{CTAdoARTelig} + S_{AdlPreART} + S_{AdlARTelig} + L_{nottreatedAdlPreART} + L_{nottreatedAdlARTelig} + \\ & L_{IPTAdlPreART} + L_{IPTAdlARTelig} + I_{nottreatedAdlPreART} + I_{nottreatedAdlARTelig} + I_{CTAdlPreART} + I_{CTAdlARTelig} + \\ & I_{FNAdoPreART} + I_{FNAdoARTelig} + I_{IPTAdoPreART} + I_{IPTAdoARTelig} + I_{FNAdlPreART} + I_{FNAdlARTelig} + I_{IPTAdlPreART} \end{aligned}$$

$$\begin{aligned}
& + I_{IPTAdIARTelig} + R_{AdoPreART} + R_{AdoARTelig})) - \zeta_{HIV} * L_{nottreatedAdoPreART} + \\
& \beta_{TBAdo} * \rho_{TBInfHIVp} * S_{AdoPreART} * ((I_{nottreatedAdoHIVn} + I_{nottreatedAdoPreART} + I_{nottreatedAdoARTelig} + I_{nottreatedAdoOnAR} \\
& TCD4low + I_{nottreatedAdoOnARTCD4high} + I_{nottreatedAdIHIVn} + I_{nottreatedAdIPreART} + I_{nottreatedAdIARTelig} + I_{nottreatedAdIOnAR} \\
& TCD4low + I_{nottreatedAdIOnARTCD4high} + I_{FNAdoHIVn} + I_{FNAdoPreART} + I_{FNAdoARTelig} + I_{FNAdoOnARTCD4low} + \\
& I_{FNAdoOnARTCD4high} + I_{IPTAdoHIVn} + I_{IPTAdoPreART} + I_{IPTAdoARTelig} + I_{IPTAdoOnARTCD4low} + \\
& I_{IPTAdoOnARTCD4high} + I_{FNAdIHIVn} + I_{FNAdIPreART} + I_{FNAdIARTelig} + I_{FNAdIOnARTCD4low} + I_{FNAdIOnARTCD4high} \\
& + I_{IPTAdIHIVn} + I_{IPTAdIPreART} + I_{IPTAdIARTelig} + I_{IPTAdIOnARTCD4low} + I_{IPTAdIOnARTCD4high})) - \\
& \xi_{AdoHIVp} * L_{nottreatedAdoPreART} - (a * (1 - \\
& \rho_{TBInfHIVp}) * \beta_{TBAdo} * L_{nottreatedAdoPreART} * (I_{nottreatedAdoHIVn} + I_{nottreatedAdoPreART} + I_{nottreatedAdoARTelig} + I_{nottreatedAdo} \\
& OnARTCD4low + I_{nottreatedAdoOnARTCD4high} + I_{nottreatedAdIHIVn} + I_{nottreatedAdIPreART} + I_{nottreatedAdIARTelig} + I_{nottreatedAd} \\
& IOnARTCD4low + I_{nottreatedAdIOnARTCD4high} + I_{FNAdoHIVn} + I_{FNAdoPreART} + I_{FNAdoARTelig} + I_{FNAdoOnARTCD4low} + \\
& I_{FNAdoOnARTCD4high} + I_{IPTAdoHIVn} + I_{IPTAdoPreART} + I_{IPTAdoARTelig} + I_{IPTAdoOnARTCD4low} + \\
& I_{IPTAdoOnARTCD4high} + I_{FNAdIHIVn} + I_{FNAdIPreART} + I_{FNAdIARTelig} + I_{FNAdIOnARTCD4low} + I_{FNAdIOnARTCD4high} \\
& + I_{IPTAdIHIVn} + I_{IPTAdIPreART} + I_{IPTAdIARTelig} + I_{IPTAdIOnARTCD4low} + I_{IPTAdIOnARTCD4high})) + \\
& (\tau_{AdoHIVp} * L_{nottreatedAdoPreART})) + \psi * I_{CTAdoPreART} - \mu_{PreARTAdo} * L_{nottreatedAdoPreART} + \iota_{IPT} * L_{IPTAdoPreART} - \\
& L_{nottreatedAdoPreART} * \vartheta_{HIVp} - \varepsilon * L_{nottreatedAdoPreART} + \phi * I_{nottreatedAdoPreART}
\end{aligned}$$

$$\begin{aligned}
dL_{nottreatedAdoARTelig} & = \zeta_{HIV} * L_{nottreatedAdoPreART} - \eta_{HIV} * L_{nottreatedAdoARTelig} \\
& + \beta_{TBAdo} * \rho_{TBInfHIVp} * S_{AdoARTelig} * ((I_{nottreatedAdoHIVn} + I_{nottreatedAdoPreART} + I_{nottreatedAdoARTelig} + I_{nottreatedAdoOnAR} \\
& RTCD4low + I_{nottreatedAdoOnARTCD4high} + I_{nottreatedAdIHIVn} + I_{nottreatedAdIPreART} + I_{nottreatedAdIARTelig} + I_{nottreatedAdIOnAR} \\
& TCD4low + I_{nottreatedAdIOnARTCD4high} + I_{FNAdoHIVn} + I_{FNAdoPreART} + I_{FNAdoARTelig} + I_{FNAdoOnARTCD4low} + \\
& I_{FNAdoOnARTCD4high} + I_{IPTAdoHIVn} + I_{IPTAdoPreART} + I_{IPTAdoARTelig} + I_{IPTAdoOnARTCD4low} + \\
& I_{IPTAdoOnARTCD4high} + I_{FNAdIHIVn} + I_{FNAdIPreART} + I_{FNAdIARTelig} + I_{FNAdIOnARTCD4low} + I_{FNAdIOnARTCD4high} \\
& + I_{IPTAdIHIVn} + I_{IPTAdIPreART} + I_{IPTAdIARTelig} + I_{IPTAdIOnARTCD4low} + I_{IPTAdIOnARTCD4high})) - \\
& \xi_{AdoHIVp} * L_{nottreatedAdoARTelig} - (a * (1 - \\
& \rho_{TBInfHIVp}) * \beta_{TBAdo} * L_{nottreatedAdoARTelig} * (I_{nottreatedAdoHIVn} + I_{nottreatedAdoPreART} + I_{nottreatedAdoARTelig} + I_{nottreatedAdo} \\
& OnARTCD4low + I_{nottreatedAdoOnARTCD4high} + I_{nottreatedAdIHIVn} + I_{nottreatedAdIPreART} + I_{nottreatedAdIARTelig} + I_{nottreatedAd} \\
& IOnARTCD4low + I_{nottreatedAdIOnARTCD4high} + I_{FNAdoHIVn} + I_{FNAdoPreART} + I_{FNAdoARTelig} + I_{FNAdoOnARTCD4low} + \\
& I_{FNAdoOnARTCD4high} + I_{IPTAdoHIVn} + I_{IPTAdoPreART} + I_{IPTAdoARTelig} + I_{IPTAdoOnARTCD4low} + \\
& I_{IPTAdoOnARTCD4high} + I_{FNAdIHIVn} + I_{FNAdIPreART} + I_{FNAdIARTelig} + I_{FNAdIOnARTCD4low} + I_{FNAdIOnARTCD4high} \\
& + I_{IPTAdIHIVn} + I_{IPTAdIPreART} + I_{IPTAdIARTelig} + I_{IPTAdIOnARTCD4low} + I_{IPTAdIOnARTCD4high})) + \\
& (\tau_{AdoHIVp} * L_{nottreatedAdoARTelig})) + \psi * I_{CTAdoARTelig} + \iota_{IPT} * L_{IPTAdoARTelig} - L_{nottreatedAdoARTelig} * \vartheta_{HIVp} - \\
& \mu_{ARTeligAdo} * L_{nottreatedAdoARTelig} - \varepsilon * L_{nottreatedAdoARTelig}
\end{aligned}$$

$$\begin{aligned}
dL_{nottreatedAdoOnARTCD4low} & = \eta_{HIV} * L_{nottreatedAdoARTelig} - \theta_{HIV} * L_{nottreatedAdoOnARTCD4low} \\
& + \text{nacure} * I_{nottreatedAdoARTelig} + \beta_{TBAdo} * \\
& \rho_{TBInfHIVART} * S_{AdoOnARTCD4low} * ((I_{nottreatedAdoHIVn} + I_{nottreatedAdoPreART} + I_{nottreatedAdoARTelig} + I_{nottreatedAdoOnAR} \\
& TCD4low + I_{nottreatedAdoOnARTCD4high} + I_{nottreatedAdIHIVn} + I_{nottreatedAdIPreART} + I_{nottreatedAdIARTelig} + I_{nottreatedAdIOnAR}
\end{aligned}$$

$$\begin{aligned}
& CD4_{low} + I_{nottreatedAdlOnARTCD4high} + I_{FNAdoHIVn} + I_{FNAdoPreART} + I_{FNAdoARTelig} + I_{FNAdoOnARTCD4low} + \\
& I_{FNAdoOnARTCD4high} + I_{IPTAdoHIVn} + I_{IPTAdoPreART} + I_{IPTAdoARTelig} + I_{IPTAdoOnARTCD4low} + \\
& I_{IPTAdoOnARTCD4high} + I_{FNAdIHIVn} + I_{FNAdlPreART} + I_{FNAdlARTelig} + I_{FNAdlOnARTCD4low} + I_{FNAdlOnARTCD4high} \\
& + I_{IPTAdIHIVn} + I_{IPTAdlPreART} + I_{IPTAdlARTelig} + I_{IPTAdlOnARTCD4low} + I_{IPTAdlOnARTCD4high})) - \\
& \xi_{AdoHIVp} * L_{nottreatedAdoOnARTCD4low} - \\
& (a * \beta_{TBado} * \rho_{TBinfHIVART} * L_{nottreatedAdoOnARTCD4low} * (I_{nottreatedAdoHIVn} + I_{nottreatedAdoPreART} + I_{nottreatedAdoARTelig} \\
& + I_{nottreatedAdoOnARTCD4low} + I_{nottreatedAdoOnARTCD4high} + I_{nottreatedAdIHIVn} + I_{nottreatedAdlPreART} + I_{nottreatedAdlARTelig} \\
& + I_{nottreatedAdlOnARTCD4low} + I_{nottreatedAdlOnARTCD4high} + I_{FNAdoHIVn} + I_{FNAdoPreART} + I_{FNAdoARTelig} + \\
& I_{FNAdoOnARTCD4low} + I_{FNAdoOnARTCD4high} + I_{IPTAdoHIVn} + I_{IPTAdoPreART} + I_{IPTAdoARTelig} + \\
& I_{IPTAdoOnARTCD4low} + I_{IPTAdoOnARTCD4high} + I_{FNAdIHIVn} + I_{FNAdlPreART} + I_{FNAdlARTelig} + I_{FNAdlOnARTCD4low} \\
& + I_{FNAdlOnARTCD4high} + I_{IPTAdIHIVn} + I_{IPTAdlPreART} + I_{IPTAdlARTelig} + I_{IPTAdlOnARTCD4low} + \\
& I_{IPTAdlOnARTCD4high}) - (\tau_{ART} * L_{nottreatedAdoOnARTCD4low})) + \psi * I_{CTAdoOnARTCD4low} - \\
& \mu_{ARTlowAdo} * L_{nottreatedAdoOnARTCD4low} + \iota * L_{IPTAdoOnARTCD4low} - L_{nottreatedAdoOnARTCD4low} * \vartheta_{ART} - \\
& \varepsilon * L_{nottreatedAdoOnARTCD4low} + \phi * I_{nottreatedAdoOnARTCD4low}
\end{aligned}$$

$$\begin{aligned}
dL_{nottreatedAdoOnARTCD4high} &= \theta_{HIV} * L_{nottreatedAdoOnARTCD4low} + \\
& \beta_{TBado} * \rho_{TBinfHIVART} * S_{AdoOnARTCD4high} * ((I_{nottreatedAdoHIVn} + I_{nottreatedAdoPreART} + I_{nottreatedAdoARTelig} + I_{nottreated} \\
& AdoOnARTCD4low + I_{nottreatedAdoOnARTCD4high} + I_{nottreatedAdIHIVn} + I_{nottreatedAdlPreART} + I_{nottreatedAdlARTelig} + I_{nottreatedAd} \\
& dlOnARTCD4low + I_{nottreatedAdlOnARTCD4high} + I_{FNAdoHIVn} + I_{FNAdoPreART} + I_{FNAdoARTelig} + I_{FNAdoOnARTCD4low} \\
& + I_{FNAdoOnARTCD4high} + I_{IPTAdoHIVn} + I_{IPTAdoPreART} + I_{IPTAdoARTelig} + I_{IPTAdoOnARTCD4low} + \\
& I_{IPTAdoOnARTCD4high} + I_{FNAdIHIVn} + I_{FNAdlPreART} + I_{FNAdlARTelig} + I_{FNAdlOnARTCD4low} + I_{FNAdlOnARTCD4high} \\
& + I_{IPTAdIHIVn} + I_{IPTAdlPreART} + I_{IPTAdlARTelig} + I_{IPTAdlOnARTCD4low} + I_{IPTAdlOnARTCD4high})) - \\
& \xi_{AdoHIVp} * L_{nottreatedAdoOnARTCD4high} - \\
& (a * \beta_{TBado} * \rho_{TBinfHIVART} * L_{nottreatedAdoOnARTCD4high} * (I_{nottreatedAdoHIVn} + I_{nottreatedAdoPreART} + I_{nottreatedAdoARTeli} \\
& g + I_{nottreatedAdoOnARTCD4low} + I_{nottreatedAdoOnARTCD4high} + I_{nottreatedAdIHIVn} + I_{nottreatedAdlPreART} + I_{nottreatedAdlARTelig} \\
& + I_{nottreatedAdlOnARTCD4low} + I_{nottreatedAdlOnARTCD4high} + I_{FNAdoHIVn} + I_{FNAdoPreART} + I_{FNAdoARTelig} + \\
& I_{FNAdoOnARTCD4low} + I_{FNAdoOnARTCD4high} + I_{IPTAdoHIVn} + I_{IPTAdoPreART} + I_{IPTAdoARTelig} + \\
& I_{IPTAdoOnARTCD4low} + I_{IPTAdoOnARTCD4high} + I_{FNAdIHIVn} + I_{FNAdlPreART} + I_{FNAdlARTelig} + I_{FNAdlOnARTCD4low} \\
& + I_{FNAdlOnARTCD4high} + I_{IPTAdIHIVn} + I_{IPTAdlPreART} + I_{IPTAdlARTelig} + I_{IPTAdlOnARTCD4low} + \\
& I_{IPTAdlOnARTCD4high}) + (\tau_{AdoHIVART} * L_{nottreatedAdoOnARTCD4high})) + \psi * I_{CTAdoOnARTCD4high} - \\
& \mu_{ARThighAdo} * L_{nottreatedAdoOnARTCD4high} + \iota_{IPT} * L_{IPTAdoOnARTCD4high} - L_{nottreatedAdoOnARTCD4high} * \vartheta_{ART} - \varepsilon \\
& * L_{nottreatedAdoOnARTCD4high} + \phi * I_{nottreatedAdoOnARTCD4high}
\end{aligned}$$

$$\begin{aligned}
dL_{IPTAdoHIVn} &= -L_{IPTAdoHIVn} * \beta_{HIVInfAdo} * ((S_{AdoPreART} + S_{AdoARTelig} + L_{nottreatedAdoPreART} + \\
& L_{nottreatedAdoARTelig} + L_{IPTAdoPreART} + L_{IPTAdoARTelig} + I_{nottreatedAdoPreART} + I_{nottreatedAdoARTelig} + \\
& I_{CTAdoPreART} + I_{CTAdoARTelig} + S_{AdlPreART} + S_{AdlARTelig} + L_{nottreatedAdlPreART} + L_{nottreatedAdlARTelig} + \\
& L_{IPTAdlPreART} + L_{IPTAdlARTelig} + I_{nottreatedAdlPreART} + I_{nottreatedAdlARTelig} + I_{CTAdlPreART} + I_{CTAdlARTelig} + \\
& I_{FNAdoPreART} + I_{FNAdoARTelig} + I_{IPTAdoPreART} + I_{IPTAdoARTelig} + I_{FNAdlPreART} + I_{FNAdlARTelig} + I_{IPTAdlPreART}
\end{aligned}$$

$$+ I_{IPTAdlARTelig} + R_{AdoPreART} + R_{AdoARTelig})) + \zeta_{AdoHIVn} * L_{nottreatedAdoHIVn} - \gamma_{IPT} * L_{IPTAdoHIVn} - ((\lambda_{HIVn} * L_{IPTAdoHIVn})) - \nu_{IPT} * L_{IPTAdoHIVn} - \mu_{Ado} * L_{IPTAdoHIVn} - \varepsilon * L_{IPTAdoHIVn}$$

$$dL_{IPTAdoPreART} = L_{IPTAdoHIVn} * \beta_{HIVInfAdo} * ((S_{AdoPreART} + S_{AdoARTelig} + L_{nottreatedAdoPreART} + L_{nottreatedAdoARTelig} + L_{IPTAdoPreART} + L_{IPTAdoARTelig} + I_{InottreatedAdoPreART} + I_{InottreatedAdoARTelig} + I_{CTAdoPreART} + I_{CTAdoARTelig} + S_{AdlPreART} + S_{AdlARTelig} + L_{nottreatedAdlPreART} + L_{nottreatedAdlARTelig} + L_{IPTAdlPreART} + L_{IPTAdlARTelig} + I_{InottreatedAdlPreART} + I_{InottreatedAdlARTelig} + I_{CTAdlPreART} + I_{CTAdlARTelig} + I_{FNAdoPreART} + I_{FNAdoARTelig} + I_{IPTAdoPreART} + I_{IPTAdoARTelig} + I_{FNAdlPreART} + I_{FNAdlARTelig} + I_{IPTAdlPreART} + I_{IPTAdlARTelig} + R_{AdoPreART} + R_{AdoARTelig})) - \zeta_{HIV} * L_{IPTAdoPreART} + \zeta_{AdoHIVp} * L_{nottreatedAdoPreART} - \gamma_{IPT} * L_{IPTAdoPreART} - ((\lambda_{HIVp} * L_{IPTAdoPreART})) - \nu_{IPT} * L_{IPTAdoPreART} - \mu_{PreARTAdo} * L_{IPTAdoPreART} - \varepsilon * L_{IPTAdoPreART}$$

$$dL_{IPTAdoARTelig} = \zeta_{HIV} * L_{IPTAdoPreART} - \eta_{HIV} * L_{IPTAdoARTelig} + \zeta_{AdoHIVp} * L_{nottreatedAdoARTelig} - \gamma_{IPT} * L_{IPTAdoARTelig} - ((\lambda_{HIVp} * L_{IPTAdoARTelig})) - \nu_{IPT} * L_{IPTAdoARTelig} - \mu_{ARTeligAdo} * L_{IPTAdoARTelig} - \varepsilon * L_{IPTAdoARTelig}$$

$$dL_{IPTAdoOnARTCD4low} = \eta_{HIV} * L_{IPTAdoARTelig} - \theta_{HIV} * L_{nottreatedAdoOnARTCD4low} + \zeta_{AdoHIVp} * L_{nottreatedAdoOnARTCD4low} - \gamma_{IPT} * L_{IPTAdoOnARTCD4low} - ((\lambda_{HIVp} * L_{IPTAdoOnARTCD4low})) - \nu_{IPT} * L_{IPTAdoOnARTCD4low} - \mu_{ARTlowAdo} * L_{IPTAdoOnARTCD4low} - \varepsilon * L_{IPTAdoOnARTCD4low}$$

$$dL_{IPTAdoOnARTCD4high} = \theta_{HIV} * L_{nottreatedAdoOnARTCD4low} + \zeta_{AdoHIVp} * L_{nottreatedAdoOnARTCD4high} - \theta_{IPT} * L_{IPTAdoOnARTCD4high} - ((\lambda_{HIVp} * L_{IPTAdoOnARTCD4high})) - \nu_{IPT} * L_{IPTAdoOnARTCD4high} - \mu_{ARThighAdo} * L_{IPTAdoOnARTCD4high} - \varepsilon * L_{IPTAdoOnARTCD4high}$$

$$dI_{nottreatedAdoHIVn} = -I_{nottreatedAdoHIVn} * \beta_{HIVInfado} * ((S_{AdoPreART} + S_{AdoARTelig} + L_{nottreatedAdoPreART} + L_{nottreatedAdoARTelig} + L_{IPTAdoPreART} + L_{IPTAdoARTelig} + I_{InottreatedAdoPreART} + I_{InottreatedAdoARTelig} + I_{CTAdoPreART} + I_{CTAdoARTelig} + S_{AdlPreART} + S_{AdlARTelig} + L_{nottreatedAdlPreART} + L_{nottreatedAdlARTelig} + L_{IPTAdlPreART} + L_{IPTAdlARTelig} + I_{InottreatedAdlPreART} + I_{InottreatedAdlARTelig} + I_{CTAdlPreART} + I_{CTAdlARTelig} + I_{FNAdoPreART} + I_{FNAdoARTelig} + I_{IPTAdoPreART} + I_{IPTAdoARTelig} + I_{FNAdlPreART} + I_{FNAdlARTelig} + I_{IPTAdlPreART} + I_{IPTAdlARTelig} + R_{AdoPreART} + R_{AdoARTelig})) + \beta_{TBado} * (1 - \rho_{TBinfHIVn}) * S_{AdoHIVn} * ((I_{nottreatedAdoHIVn} + I_{nottreatedAdoPreART} + I_{nottreatedAdoARTelig} + I_{nottreatedAdoOnARTCD4low} + I_{nottreatedAdoOnARTCD4high} + I_{nottreatedAdlHIVn} + I_{nottreatedAdlPreART} + I_{nottreatedAdlARTelig} + I_{nottreatedAdlOnARTCD4low} + I_{nottreatedAdlOnARTCD4high} + I_{FNAdoHIVn} + I_{FNAdoPreART} + I_{FNAdoARTelig} + I_{FNAdoOnARTCD4low} + I_{FNAdoOnARTCD4high} + I_{IPTAdoHIVn} + I_{IPTAdoPreART} + I_{IPTAdoARTelig} + I_{IPTAdoOnARTCD4low} +$$

$$\begin{aligned}
& I_{IPTAdoOnARTCD4high} + I_{FNAdIHIVn} + I_{FNAdlPreART} + I_{FNAdlARTelig} + I_{FNAdlOnARTCD4low} + I_{FNAdlOnARTCD4high} \\
& + I_{IPTAdIHIVn} + I_{IPTAdlPreART} + I_{IPTAdlARTelig} + I_{IPTAdlOnARTCD4low} + I_{IPTAdlOnARTCD4high})) + (a*(1- \\
& \rho_{TBinfHIVn}) * \beta_{TBado} * L_{nottreatedAdoHIVn} * (I_{nottreatedAdoHIVn} + I_{nottreatedAdoPreART} + I_{nottreatedAdoARTelig} + I_{nottreatedAdo} \\
& OnARTCD4low + I_{nottreatedAdoOnARTCD4high} + I_{nottreatedAdIHIVn} + I_{nottreatedAdlPreART} + I_{nottreatedAdlARTelig} + I_{nottreatedAdlO} \\
& nARTCD4low + I_{nottreatedAdlOnARTCD4high} + I_{FNAdoHIVn} + I_{FNAdoPreART} + I_{FNAdoARTelig} + I_{FNAdoOnARTCD4low} + \\
& I_{FNAdoOnARTCD4high} + I_{IPTAdoHIVn} + I_{IPTAdoPreART} + I_{IPTAdoARTelig} + I_{IPTAdoOnARTCD4low} + \\
& I_{IPTAdoOnARTCD4high} + I_{FNAdIHIVn} + I_{FNAdlPreART} + I_{FNAdlARTelig} + I_{FNAdlOnARTCD4low} + I_{FNAdlOnARTCD4high} \\
& + I_{IPTAdIHIVn} + I_{IPTAdlPreART} + I_{IPTAdlARTelig} + I_{IPTAdlOnARTCD4low} + I_{IPTAdlOnARTCD4high})) + \\
& (\tau_{AdoHIVn} * L_{nottreatedAdoHIVn})) - \chi_{Ado} * I_{nottreatedAdoHIVn} + \sigma * I_{CTAdoHIVn} - \mu_{TBado} * I_{nottreatedAdoHIVn} - \\
& \varepsilon * I_{nottreatedAdoHIVn} - \varphi * I_{nottreatedAdoHIVn}
\end{aligned}$$

$$\begin{aligned}
dI_{nottreatedAdoPreART} = & I_{nottreatedAdoHIVn} * \beta_{HIVInfAdo} * ((S_{AdoPreART} + S_{AdoARTelig} + L_{nottreatedAdoPreART} + \\
& L_{nottreatedAdoARTelig} + L_{IPTAdoPreART} + L_{IPTAdoARTelig} + I_{nottreatedAdoPreART} + I_{nottreatedAdoARTelig} + \\
& I_{CTAdoPreART} + I_{CTAdoARTelig} + S_{AdlPreART} + S_{AdlARTelig} + L_{nottreatedAdlPreART} + L_{nottreatedAdlARTelig} + \\
& L_{IPTAdlPreART} + L_{IPTAdlARTelig} + I_{nottreatedAdlPreART} + I_{nottreatedAdlARTelig} + I_{CTAdlPreART} + I_{CTAdlARTelig} + \\
& I_{FNAdoPreART} + I_{FNAdoARTelig} + I_{IPTAdoPreART} + I_{IPTAdoARTelig} + I_{FNAdlPreART} + I_{FNAdlARTelig} + I_{IPTAdlPreART} \\
& + I_{IPTAdlARTelig} + R_{AdoPreART} + R_{AdoARTelig})) - \zeta_{HIV} * I_{nottreatedAdoPreART} + \beta_{TBado} * (1 - \rho_{TBinfHIVp}) * \\
& S_{AdoPreART} * \\
& ((I_{nottreatedAdoHIVn} + I_{nottreatedAdoPreART} + I_{nottreatedAdoARTelig} + I_{nottreatedAdoOnARTCD4low} + I_{nottreatedAdoOnARTCD4high} \\
& + I_{nottreatedAdIHIVn} + I_{nottreatedAdlPreART} + I_{nottreatedAdlARTelig} + I_{nottreatedAdlOnARTCD4low} + I_{nottreatedAdlOnARTCD4high} \\
& + I_{FNAdoHIVn} + I_{FNAdoPreART} + I_{FNAdoARTelig} + I_{FNAdoOnARTCD4low} + I_{FNAdoOnARTCD4high} + I_{IPTAdoHIVn} + \\
& I_{IPTAdoPreART} + I_{IPTAdoARTelig} + I_{IPTAdoOnARTCD4low} + I_{IPTAdoOnARTCD4high} + I_{FNAdIHIVn} + I_{FNAdlPreART} + \\
& I_{FNAdlARTelig} + I_{FNAdlOnARTCD4low} + I_{FNAdlOnARTCD4high} + I_{IPTAdIHIVn} + I_{IPTAdlPreART} + I_{IPTAdlARTelig} + \\
& I_{IPTAdlOnARTCD4low} + I_{IPTAdlOnARTCD4high})) + (a*(1- \\
& \rho_{TBinfHIVp}) * \beta_{TBado} * L_{nottreatedAdoPreART} * (I_{nottreatedAdoHIVn} + I_{nottreatedAdoPreART} + I_{nottreatedAdoARTelig} + I_{nottreatedAdo} \\
& doOnARTCD4low + I_{nottreatedAdoOnARTCD4high} + I_{nottreatedAdIHIVn} + I_{nottreatedAdlPreART} + I_{nottreatedAdlARTelig} + I_{nottreatedAdlO} \\
& nARTCD4low + I_{nottreatedAdlOnARTCD4high} + I_{FNAdoHIVn} + I_{FNAdoPreART} + I_{FNAdoARTelig} + I_{FNAdoOnARTCD4low} + \\
& I_{FNAdoOnARTCD4high} + I_{IPTAdoHIVn} + I_{IPTAdoPreART} + I_{IPTAdoARTelig} + I_{IPTAdoOnARTCD4low} + \\
& I_{IPTAdoOnARTCD4high} + I_{FNAdIHIVn} + I_{FNAdlPreART} + I_{FNAdlARTelig} + I_{FNAdlOnARTCD4low} + I_{FNAdlOnARTCD4high} \\
& + I_{IPTAdIHIVn} + I_{IPTAdlPreART} + I_{IPTAdlARTelig} + I_{IPTAdlOnARTCD4low} + I_{IPTAdlOnARTCD4high})) + \\
& (\tau_{AdoHIVp} * L_{nottreatedAdoPreART})) - \chi_{Ado} * I_{nottreatedAdoPreART} + \sigma * I_{CTAdoPreART} - \\
& \mu_{TBPreARTado} * I_{nottreatedAdoPreART} - \varepsilon * I_{nottreatedAdoPreART} - \varphi * I_{nottreatedAdoPreART}
\end{aligned}$$

$$\begin{aligned}
dI_{nottreatedAdoARTelig} = & \zeta_{HIV} * I_{nottreatedAdoPreART} - \eta_{HIV} * I_{nottreatedAdoARTelig} + \beta_{TBado} * (1- \\
& \rho_{TBinfHIVp}) * S_{AdoARTelig} * ((I_{nottreatedAdoHIVn} + I_{nottreatedAdoPreART} + I_{nottreatedAdoARTelig} + I_{nottreatedAdoOnARTCD4low} \\
& + I_{nottreatedAdoOnARTCD4high} + I_{nottreatedAdIHIVn} + I_{nottreatedAdlPreART} + I_{nottreatedAdlARTelig} + I_{nottreatedAdlOnARTCD4low} + \\
& I_{nottreatedAdlOnARTCD4high} + I_{FNAdoHIVn} + I_{FNAdoPreART} + I_{FNAdoARTelig} + I_{FNAdoOnARTCD4low} + \\
& I_{FNAdoOnARTCD4high} + I_{IPTAdoHIVn} + I_{IPTAdoPreART} + I_{IPTAdoARTelig} + I_{IPTAdoOnARTCD4low} +
\end{aligned}$$



$$\begin{aligned}
& I_{IPTAdoOnARTCD4high} + I_{FNAdIHIVn} + I_{FNAdlPreART} + I_{FNAdlARTelig} + I_{FNAdlOnARTCD4low} + I_{FNAdlOnARTCD4high} \\
& + I_{IPTAdIHIVn} + I_{IPTAdlPreART} + I_{IPTAdlARTelig} + I_{IPTAdlOnARTCD4low} + I_{IPTAdlOnARTCD4high}) + (a^*(1 - \\
& \rho_{TBInfHIVp}) * \beta_{TBAdo} * L_{nottreatedAdoARTelig} * (I_{nottreatedAdoHIVn} + I_{nottreatedAdoPreART} + I_{nottreatedAdoARTelig} + I_{nottreated} \\
& AdoOnARTCD4low + I_{nottreatedAdoOnARTCD4high} + I_{nottreatedAdlIHIVn} + I_{nottreatedAdlPreART} + I_{nottreatedAdlARTelig} + I_{nottreatedA} \\
& dlOnARTCD4low + I_{nottreatedAdlOnARTCD4high} + I_{FNAdoHIVn} + I_{FNAdoPreART} + I_{FNAdoARTelig} + I_{FNAdoOnARTCD4low} \\
& + I_{FNAdoOnARTCD4high} + I_{IPTAdoHIVn} + I_{IPTAdoPreART} + I_{IPTAdoARTelig} + I_{IPTAdoOnARTCD4low} + \\
& I_{IPTAdoOnARTCD4high} + I_{FNAdIHIVn} + I_{FNAdlPreART} + I_{FNAdlARTelig} + I_{FNAdlOnARTCD4low} + I_{FNAdlOnARTCD4high} \\
& + I_{IPTAdIHIVn} + I_{IPTAdlPreART} + I_{IPTAdlARTelig} + I_{IPTAdlOnARTCD4low} + I_{IPTAdlOnARTCD4high}) + \\
& (\tau_{AdoHIVp} * L_{nottreatedAdoARTelig}) + \sigma * I_{CTAdoARTelig} - \chi_{Ado} * I_{nottreatedAdoARTelig} - \\
& \mu_{TBARTeligAdo} * I_{nottreatedAdoARTelig} - \varepsilon * I_{nottreatedAdoARTelig} - \varphi * I_{nottreatedAdoARTelig}
\end{aligned}$$

$$\begin{aligned}
dI_{nottreatedAdoOnARTCD4low} = & \eta_{HIV} * I_{nottreatedAdoARTelig} - \theta_{HIV} * I_{nottreatedAdoOnARTCD4low} + \beta_{TBAdo} * (1 - \\
& \rho_{TBInfHIVART}) * S_{AdoOnARTCD4low} * ((I_{nottreatedAdoHIVn} + I_{nottreatedAdoPreART} + I_{nottreatedAdoARTelig} + I_{nottreatedAdoOnA} \\
& RTCD4low + I_{nottreatedAdoOnARTCD4high} + I_{nottreatedAdlIHIVn} + I_{nottreatedAdlPreART} + I_{nottreatedAdlARTelig} + I_{nottreatedAdlOnAR} \\
& TCD4low + I_{nottreatedAdlOnARTCD4high} + I_{FNAdoHIVn} + I_{FNAdoPreART} + I_{FNAdoARTelig} + I_{FNAdoOnARTCD4low} + \\
& I_{FNAdoOnARTCD4high} + I_{IPTAdoHIVn} + I_{IPTAdoPreART} + I_{IPTAdoARTelig} + I_{IPTAdoOnARTCD4low} + \\
& I_{IPTAdoOnARTCD4high} + I_{FNAdIHIVn} + I_{FNAdlPreART} + I_{FNAdlARTelig} + I_{FNAdlOnARTCD4low} + I_{FNAdlOnARTCD4high} \\
& + I_{IPTAdIHIVn} + I_{IPTAdlPreART} + I_{IPTAdlARTelig} + I_{IPTAdlOnARTCD4low} + I_{IPTAdlOnARTCD4high})) + \\
& (a * \beta_{TBAdo} * \rho_{TBInfHIVART} * L_{nottreatedAdoOnARTCD4low} * (I_{nottreatedAdoHIVn} + I_{nottreatedAdoPreART} + I_{nottreatedAdoARTeli} \\
& g + I_{nottreatedAdoOnARTCD4low} + I_{nottreatedAdoOnARTCD4high} + I_{nottreatedAdlIHIVn} + I_{nottreatedAdlPreART} + I_{nottreatedAdlARTelig} \\
& + I_{nottreatedAdlOnARTCD4low} + I_{nottreatedAdlOnARTCD4high} + I_{FNAdoHIVn} + I_{FNAdoPreART} + I_{FNAdoARTelig} + \\
& I_{FNAdoOnARTCD4low} + I_{FNAdoOnARTCD4high} + I_{IPTAdoHIVn} + I_{IPTAdoPreART} + I_{IPTAdoARTelig} + \\
& I_{IPTAdoOnARTCD4low} + I_{IPTAdoOnARTCD4high} + I_{FNAdIHIVn} + I_{FNAdlPreART} + I_{FNAdlARTelig} + I_{FNAdlOnARTCD4low} \\
& + I_{FNAdlOnARTCD4high} + I_{IPTAdIHIVn} + I_{IPTAdlPreART} + I_{IPTAdlARTelig} + I_{IPTAdlOnARTCD4low} + \\
& I_{IPTAdlOnARTCD4high}) + (\tau_{AdoHIVART} * L_{nottreatedAdoOnARTCD4low})) - \chi_{Ado} * I_{nottreatedAdoOnARTCD4low} + \\
& \sigma * I_{CTAdoOnARTCD4low} - \mu_{TBARTlowAdo} * I_{nottreatedAdoOnARTCD4low} - \varepsilon * I_{nottreatedAdoOnARTCD4low} - \\
& \varphi * I_{nottreatedAdoOnARTCD4low}
\end{aligned}$$

$$\begin{aligned}
dI_{nottreatedAdoOnARTCD4high} = & \theta_{HIV} * I_{nottreatedAdoOnARTCD4low} + \beta_{TBAdo} * (1 - \\
& \rho_{TBInfHIVART}) * S_{AdoOnARTCD4high} * ((I_{nottreatedAdoHIVn} + I_{nottreatedAdoPreART} + I_{nottreatedAdoARTelig} + I_{nottreatedAdoOnA} \\
& RTCD4low + I_{nottreatedAdoOnARTCD4high} + I_{nottreatedAdlIHIVn} + I_{nottreatedAdlPreART} + I_{nottreatedAdlARTelig} + I_{nottreatedAdlOnAR} \\
& TCD4low + I_{nottreatedAdlOnARTCD4high} + I_{FNAdoHIVn} + I_{FNAdoPreART} + I_{FNAdoARTelig} + I_{FNAdoOnARTCD4low} + \\
& I_{FNAdoOnARTCD4high} + I_{IPTAdoHIVn} + I_{IPTAdoPreART} + I_{IPTAdoARTelig} + I_{IPTAdoOnARTCD4low} + \\
& I_{IPTAdoOnARTCD4high} + I_{FNAdIHIVn} + I_{FNAdlPreART} + I_{FNAdlARTelig} + I_{FNAdlOnARTCD4low} + I_{FNAdlOnARTCD4high} \\
& + I_{IPTAdIHIVn} + I_{IPTAdlPreART} + I_{IPTAdlARTelig} + I_{IPTAdlOnARTCD4low} + I_{IPTAdlOnARTCD4high})) + \\
& (a * \beta_{TBAdo} * \rho_{TBInfHIVART} * L_{nottreatedAdoOnARTCD4high} * (I_{nottreatedAdoHIVn} + I_{nottreatedAdoPreART} + I_{nottreatedAdoARTeli} \\
& g + I_{nottreatedAdoOnARTCD4low} + I_{nottreatedAdoOnARTCD4high} + I_{nottreatedAdlIHIVn} + I_{nottreatedAdlPreART} + I_{nottreatedAdlARTelig} \\
& + I_{nottreatedAdlOnARTCD4low} + I_{nottreatedAdlOnARTCD4high} + I_{FNAdoHIVn} + I_{FNAdoPreART} + I_{FNAdoARTelig} + \\
& I_{FNAdoOnARTCD4low} + I_{FNAdoOnARTCD4high} + I_{IPTAdoHIVn} + I_{IPTAdoPreART} + I_{IPTAdoARTelig} + \\
& I_{IPTAdoOnARTCD4low} + I_{IPTAdoOnARTCD4high} + I_{FNAdIHIVn} + I_{FNAdlPreART} + I_{FNAdlARTelig} + I_{FNAdlOnARTCD4low} \\
& + I_{FNAdlOnARTCD4high} + I_{IPTAdIHIVn} + I_{IPTAdlPreART} + I_{IPTAdlARTelig} + I_{IPTAdlOnARTCD4low} + \\
& I_{IPTAdlOnARTCD4high})) + (\tau_{AdoHIVART} * L_{nottreatedAdoOnARTCD4high})) - \chi_{Ado} * I_{nottreatedAdoOnARTCD4high} + \\
& \sigma * I_{CTAdoOnARTCD4high} - \mu_{TBARThighAdo} * I_{nottreatedAdoOnARTCD4high} - \varepsilon * I_{nottreatedAdoOnARTCD4high} - \\
& \varphi * I_{nottreatedAdoOnARTCD4high}
\end{aligned}$$

$$\begin{aligned}
& I_{FNAdoOnARTCD4low} + I_{FNAdoOnARTCD4high} + I_{IPTAdoHIVn} + I_{IPTAdoPreART} + I_{IPTAdoARTelig} + \\
& I_{IPTAdoOnARTCD4low} + I_{IPTAdoOnARTCD4high} + I_{FNAdIHIVn} + I_{FNAdlPreART} + I_{FNAdlARTelig} + I_{FNAdlOnARTCD4low} \\
& + I_{FNAdlOnARTCD4high} + I_{IPTAdIHIVn} + I_{IPTAdlPreART} + I_{IPTAdlARTelig} + I_{IPTAdlOnARTCD4low} + \\
& I_{IPTAdlOnARTCD4high}) + (\tau_{AdoHIVART} * L_{nottreatedAdoOnARTCD4high})) - \chi_{Ado} * I_{nottreatedAdoOnARTCD4high} + \sigma \\
& * I_{CTAdoOnARTCD4high} - \mu_{TBARThighAdo} * I_{nottreatedAdoOnARTCD4high} - \varepsilon * I_{nottreatedAdoOnARTCD4high} - \\
& \phi * I_{nottreatedAdoOnARTCD4high}
\end{aligned}$$

$$\begin{aligned}
dI_{CTAdoHIVn} = & -I_{CTAdoHIVn} * \beta_{HIVinfado} * ((S_{AdoPreART} + S_{AdoARTelig} + L_{nottreatedAdoPreART} + \\
& L_{nottreatedAdoARTelig} + L_{IPTAdoPreART} + L_{IPTAdoARTelig} + I_{nottreatedAdoPreART} + I_{nottreatedAdoARTelig} + \\
& I_{CTAdoPreART} + I_{CTAdoARTelig} + S_{AdlPreART} + S_{AdlARTelig} + L_{nottreatedAdlPreART} + L_{nottreatedAdlARTelig} + \\
& L_{IPTAdlPreART} + L_{IPTAdlARTelig} + I_{nottreatedAdlPreART} + I_{nottreatedAdlARTelig} + I_{CTAdlPreART} + I_{CTAdlARTelig} + \\
& I_{FNAdoPreART} + I_{FNAdoARTelig} + I_{IPTAdoPreART} + I_{IPTAdoARTelig} + I_{FNAdlPreART} + I_{FNAdlARTelig} + I_{IPTAdlPreART} \\
& + I_{IPTAdlARTelig} + R_{AdoPreART} + R_{AdoARTelig})) + \chi_{Ado} * I_{nottreatedAdoHIVn} - \gamma_{CT} * I_{CTAdoHIVn} - \psi * I_{CTAdoHIVn} - \\
& \sigma * I_{CTAdoHIVn} + \phi * I_{IPTAdoHIVn} - \mu_{TBAdo} * I_{CTAdoHIVn} - \varepsilon * I_{CTAdoHIVn}
\end{aligned}$$

$$\begin{aligned}
dI_{CTAdoPreART} = & I_{CTAdoHIVn} * \beta_{HIVinfado} * ((S_{AdoPreART} + S_{AdoARTelig} + L_{nottreatedAdoPreART} + \\
& L_{nottreatedAdoARTelig} + L_{IPTAdoPreART} + L_{IPTAdoARTelig} + I_{nottreatedAdoPreART} + I_{nottreatedAdoARTelig} + \\
& I_{CTAdoPreART} + I_{CTAdoARTelig} + S_{AdlPreART} + S_{AdlARTelig} + L_{nottreatedAdlPreART} + L_{nottreatedAdlARTelig} + \\
& L_{IPTAdlPreART} + L_{IPTAdlARTelig} + I_{nottreatedAdlPreART} + I_{nottreatedAdlARTelig} + I_{CTAdlPreART} + I_{CTAdlARTelig} + \\
& I_{FNAdoPreART} + I_{FNAdoARTelig} + I_{IPTAdoPreART} + I_{IPTAdoARTelig} + I_{FNAdlPreART} + I_{FNAdlARTelig} + I_{IPTAdlPreART} \\
& + I_{IPTAdlARTelig} + R_{AdoPreART} + R_{AdoARTelig})) - \zeta_{HIV} * I_{CTAdoPreART} + \chi_{Ado} * I_{nottreatedAdoPreART} - \\
& \gamma_{CT} * I_{CTAdoPreART} - \sigma * I_{CTAdoPreART} - \psi * I_{CTAdoPreART} + \phi * I_{IPTAdoPreART} - \mu_{TBPreARTAdo} * I_{CTAdoPreART} - \\
& \varepsilon * I_{CTAdoPreART}
\end{aligned}$$

$$\begin{aligned}
dI_{CTAdoARTelig} = & \zeta_{HIV} * I_{CTAdoPreART} - \eta_{HIV} * I_{CTAdoARTelig} + \chi_{Ado} * I_{nottreatedAdoARTelig} - \gamma_{CT} * I_{CTAdoARTelig} - \\
& \psi * I_{CTAdoARTelig} + \phi * I_{IPTAdoARTelig} - \mu_{TBARTeligAdo} * I_{CTAdoARTelig} - \varepsilon * I_{CTAdoARTelig}
\end{aligned}$$

$$\begin{aligned}
dI_{CTAdoOnARTCD4low} = & \eta_{HIV} * I_{CTAdoARTelig} - \theta_{HIV} * I_{CTAdoOnARTCD4low} + \chi_{Ado} * I_{nottreatedAdoOnARTCD4low} - \\
& \gamma_{CT} * I_{CTAdoOnARTCD4low} - \psi * I_{CTAdoOnARTCD4low} + \phi * I_{IPTAdoOnARTCD4low} - \sigma * I_{CTAdoARTelig} - \\
& \mu_{TBARTlowAdo} * I_{CTAdoOnARTCD4low} - \varepsilon * I_{CTAdoOnARTCD4low}
\end{aligned}$$

$$\begin{aligned}
dI_{CTAdoOnARTCD4high} = & \theta_{HIV} * I_{CTAdoOnARTCD4low} + \chi_{Ado} * I_{nottreatedAdoOnARTCD4high} - \\
& \gamma_{CT} * I_{CTAdoOnARTCD4high} - \psi * I_{CTAdoOnARTCD4high} + \phi * I_{IPTAdoOnARTCD4high} - \sigma * I_{CTAdoOnARTCD4high} - \\
& \mu_{TBARThighAdo} * I_{CTAdoOnARTCD4high} - \varepsilon * I_{CTAdoOnARTCD4high}
\end{aligned}$$

$$\begin{aligned}
dI_{\text{FNAdoHIVn}} = & -I_{\text{FNAdoHIVn}} * \beta_{\text{HIVInfAdo}} * ((S_{\text{AdoPreART}} + S_{\text{AdoARTelig}} + L_{\text{nottreatedAdoPreART}} + \\
& L_{\text{nottreatedAdoARTelig}} + L_{\text{IPTAdoPreART}} + L_{\text{IPTAdoARTelig}} + I_{\text{nottreatedAdoPreART}} + I_{\text{nottreatedAdoARTelig}} + \\
& I_{\text{CTAdoPreART}} + I_{\text{CTAdoARTelig}} + S_{\text{AdlPreART}} + S_{\text{AdlARTelig}} + L_{\text{nottreatedAdlPreART}} + L_{\text{nottreatedAdlARTelig}} + \\
& L_{\text{IPTAdlPreART}} + L_{\text{IPTAdlARTelig}} + I_{\text{nottreatedAdlPreART}} + I_{\text{nottreatedAdlARTelig}} + I_{\text{CTAdlPreART}} + I_{\text{CTAdlARTelig}} + \\
& I_{\text{FNAdoPreART}} + I_{\text{FNAdoARTelig}} + I_{\text{IPTAdoPreART}} + I_{\text{IPTAdoARTelig}} + I_{\text{FNAdlPreART}} + I_{\text{FNAdlARTelig}} + I_{\text{IPTAdlPreART}} \\
& + I_{\text{IPTAdlARTelig}} + R_{\text{AdoPreART}} + R_{\text{AdoARTelig}})) + L_{\text{nottreatedAdoHIVn}} * \vartheta_{\text{HIVn}} - I_{\text{FNAdoHIVn}} * \xi_{\text{Ado}} - \varepsilon * I_{\text{FNAdoHIVn}} \\
& - \mu_{\text{TBAdo}} * I_{\text{FNAdoHIVn}}
\end{aligned}$$

$$\begin{aligned}
dI_{\text{FNAdoPreART}} = & I_{\text{FNAdoHIVn}} * \beta_{\text{HIVInfAdo}} * ((S_{\text{AdoPreART}} + S_{\text{AdoARTelig}} + L_{\text{nottreatedAdoPreART}} + \\
& L_{\text{nottreatedAdoARTelig}} + L_{\text{IPTAdoPreART}} + L_{\text{IPTAdoARTelig}} + I_{\text{nottreatedAdoPreART}} + I_{\text{nottreatedAdoARTelig}} + \\
& I_{\text{CTAdoPreART}} + I_{\text{CTAdoARTelig}} + S_{\text{AdlPreART}} + S_{\text{AdlARTelig}} + L_{\text{nottreatedAdlPreART}} + L_{\text{nottreatedAdlARTelig}} + \\
& L_{\text{IPTAdlPreART}} + L_{\text{IPTAdlARTelig}} + I_{\text{nottreatedAdlPreART}} + I_{\text{nottreatedAdlARTelig}} + I_{\text{CTAdlPreART}} + I_{\text{CTAdlARTelig}} + \\
& I_{\text{FNAdoPreART}} + I_{\text{FNAdoARTelig}} + I_{\text{IPTAdoPreART}} + I_{\text{IPTAdoARTelig}} + I_{\text{FNAdlPreART}} + I_{\text{FNAdlARTelig}} + I_{\text{IPTAdlPreART}} \\
& + I_{\text{IPTAdlARTelig}} + R_{\text{AdoPreART}} + R_{\text{AdoARTelig}})) - \zeta_{\text{HIV}} * I_{\text{FNAdoPreART}} + L_{\text{nottreatedAdoPreART}} * \vartheta_{\text{HIVp}} - \\
& I_{\text{FNAdoPreART}} * \xi_{\text{Ado}} - \varepsilon * I_{\text{FNAdoPreART}} - \mu_{\text{TBPreARTAdo}} * I_{\text{FNAdoPreART}}
\end{aligned}$$

$$\begin{aligned}
dI_{\text{FNAdoARTelig}} = & L_{\text{nottreatedAdoARTelig}} * \vartheta_{\text{HIVp}} - I_{\text{FNAdoARTelig}} * \xi_{\text{Ado}} + \zeta_{\text{HIV}} * I_{\text{FNAdoPreART}} - \theta_{\text{HIV}} * I_{\text{FNAdoARTelig}} \\
& - \varepsilon * I_{\text{FNAdoARTelig}} - \mu_{\text{TBARTeligAdo}} * I_{\text{FNAdoARTelig}}
\end{aligned}$$

$$\begin{aligned}
dI_{\text{FNAdoOnARTCD4low}} = & L_{\text{nottreatedAdoOnARTCD4low}} * \vartheta_{\text{ART}} - I_{\text{FNAdoOnARTCD4low}} * \xi_{\text{Ado}} + \eta_{\text{HIV}} * I_{\text{FNAdoARTelig}} - \\
& \theta_{\text{HIV}} * I_{\text{FNAdoOnARTCD4low}} - \varepsilon * I_{\text{FNAdoOnARTCD4low}} - \mu_{\text{TBARTlowAdo}} * I_{\text{FNAdoOnARTCD4low}}
\end{aligned}$$

$$\begin{aligned}
dI_{\text{FNAdoOnARTCD4high}} = & L_{\text{nottreatedAdoOnARTCD4high}} * \vartheta_{\text{ART}} - I_{\text{FNAdoOnARTCD4high}} * \xi_{\text{Ado}} + \\
& \theta_{\text{HIV}} * I_{\text{FNAdoOnARTCD4low}} - \varepsilon * I_{\text{FNAdoOnARTCD4high}} - \mu_{\text{TBARThighAdo}} * I_{\text{FNAdoOnARTCD4high}}
\end{aligned}$$

$$\begin{aligned}
dI_{\text{IPTAdoHIVn}} = & -I_{\text{IPTAdoHIVn}} * \beta_{\text{HIVInfAdo}} * ((S_{\text{AdoPreART}} + S_{\text{AdoARTelig}} + L_{\text{nottreatedAdoPreART}} + \\
& L_{\text{nottreatedAdoARTelig}} + L_{\text{IPTAdoPreART}} + L_{\text{IPTAdoARTelig}} + I_{\text{nottreatedAdoPreART}} + I_{\text{nottreatedAdoARTelig}} + \\
& I_{\text{CTAdoPreART}} + I_{\text{CTAdoARTelig}} + S_{\text{AdlPreART}} + S_{\text{AdlARTelig}} + L_{\text{nottreatedAdlPreART}} + L_{\text{nottreatedAdlARTelig}} + \\
& L_{\text{IPTAdlPreART}} + L_{\text{IPTAdlARTelig}} + I_{\text{nottreatedAdlPreART}} + I_{\text{nottreatedAdlARTelig}} + I_{\text{CTAdlPreART}} + I_{\text{CTAdlARTelig}} + \\
& I_{\text{FNAdoPreART}} + I_{\text{FNAdoARTelig}} + I_{\text{IPTAdoPreART}} + I_{\text{IPTAdoARTelig}} + I_{\text{FNAdlPreART}} + I_{\text{FNAdlARTelig}} + I_{\text{IPTAdlPreART}} \\
& + I_{\text{IPTAdlARTelig}} + R_{\text{AdoPreART}} + R_{\text{AdoARTelig}})) + I_{\text{FNAdoHIVn}} * \xi_{\text{Ado}} + ((\lambda_{\text{HIVn}} * L_{\text{IPTAdoHIVn}})) - \phi * I_{\text{IPTAdoHIVn}} \\
& - \varepsilon * I_{\text{IPTAdoHIVn}} - \mu_{\text{TBAdo}} * I_{\text{IPTAdoHIVn}}
\end{aligned}$$

$$\begin{aligned}
dI_{IPTAdoPreART} = & I_{IPTAdoHIVn} * \beta_{HIVInfAdo} * ((S_{AdoPreART} + S_{AdoARTelig} + L_{nottreatedAdoPreART} + \\
& L_{nottreatedAdoARTelig} + L_{IPTAdoPreART} + L_{IPTAdoARTelig} + I_{nottreatedAdoPreART} + I_{nottreatedAdoARTelig} + \\
& I_{CTAdoPreART} + I_{CTAdoARTelig} + S_{AdlPreART} + S_{AdlARTelig} + L_{nottreatedAdlPreART} + L_{nottreatedAdlARTelig} + \\
& L_{IPTAdlPreART} + L_{IPTAdlARTelig} + I_{nottreatedAdlPreART} + I_{nottreatedAdlARTelig} + I_{CTAdlPreART} + I_{CTAdlARTelig} + \\
& I_{FNAdoPreART} + I_{FNAdoARTelig} + I_{IPTAdoPreART} + I_{IPTAdoARTelig} + I_{FNAdlPreART} + I_{FNAdlARTelig} + I_{IPTAdlPreART} \\
& + I_{IPTAdlARTelig} + R_{AdoPreART} + R_{AdoARTelig})) - \zeta_{HIV} * I_{IPTAdoPreART} + I_{FNAdoPreART} * \xi_{Ado} + \\
& ((\lambda_{HIVp} * L_{IPTAdoPreART})) - \phi * I_{IPTAdoPreART} - \varepsilon * I_{IPTAdoPreART} - \mu_{TBPreARTAdo} * I_{IPTAdoPreART}
\end{aligned}$$

$$\begin{aligned}
dI_{IPTAdoARTelig} = & \zeta_{HIV} * I_{IPTAdoPreART} - \eta_{HIV} * I_{IPTAdoARTelig} + I_{FNAdoARTelig} * \xi_{Ado} + \\
& ((\lambda_{HIVp} * L_{IPTAdoARTelig})) - \phi * I_{IPTAdoARTelig} - \varepsilon * I_{IPTAdoARTelig} - \mu_{TBARTeligAdo} * I_{IPTAdoARTelig}
\end{aligned}$$

$$\begin{aligned}
dI_{IPTAdoOnARTCD4low} = & \eta_{HIV} * I_{IPTAdoARTelig} - \theta_{HIV} * I_{IPTAdoOnARTCD4low} + I_{FNAdoOnARTCD4low} * \xi_{Ado} + \\
& ((\lambda_{HIVp} * L_{IPTAdoOnARTCD4low})) - \phi * I_{IPTAdoOnARTCD4low} - \varepsilon * I_{IPTAdoOnARTCD4low} - \\
& \mu_{TBARTlowAdo} * I_{IPTAdoOnARTCD4low}
\end{aligned}$$

$$\begin{aligned}
dI_{IPTAdoOnARTCD4high} = & \theta_{HIV} * I_{IPTAdoOnARTCD4low} + I_{FNAdoOnARTCD4high} * \xi_{Ado} + \\
& ((\lambda_{HIVp} * L_{IPTAdoOnARTCD4high})) - \phi * I_{IPTAdoOnARTCD4high} - \varepsilon * I_{IPTAdoOnARTCD4high} - \\
& \mu_{TBARThighAdo} * I_{IPTAdoOnARTCD4high}
\end{aligned}$$

## Adults

$$\begin{aligned}
dS_{AdlHIVn} = & \varepsilon * S_{AdoHIVn} - S_{AdlHIVn} * \beta_{HIVInfAdl} * ((S_{AdoPreART} + S_{AdoARTelig} + L_{nottreatedAdoPreART} + \\
& L_{nottreatedAdoARTelig} + L_{IPTAdoPreART} + L_{IPTAdoARTelig} + I_{nottreatedAdoPreART} + I_{nottreatedAdoARTelig} + \\
& I_{CTAdoPreART} + I_{CTAdoARTelig} + S_{AdlPreART} + S_{AdlARTelig} + L_{nottreatedAdlPreART} + L_{nottreatedAdlARTelig} + \\
& L_{IPTAdlPreART} + L_{IPTAdlARTelig} + I_{nottreatedAdlPreART} + I_{nottreatedAdlARTelig} + I_{CTAdlPreART} + I_{CTAdlARTelig} + \\
& I_{FNAdoPreART} + I_{FNAdoARTelig} + I_{IPTAdoPreART} + I_{IPTAdoARTelig} + I_{FNAdlPreART} + I_{FNAdlARTelig} + I_{IPTAdlPreART} \\
& + I_{IPTAdlARTelig} + R_{AdoPreART} + R_{AdoARTelig})) - \\
& \beta_{TBadl} * S_{AdlHIVn} * ((I_{nottreatedAdoHIVn} + I_{nottreatedAdoPreART} + I_{nottreatedAdoARTelig} + I_{nottreatedAdoOnARTCD4low} + I_{nottreat} \\
& edAdoOnARTCD4high} + I_{nottreatedAdlHIVn} + I_{nottreatedAdlPreART} + I_{nottreatedAdlARTelig} + I_{nottreatedAdlOnARTCD4low} + I_{nottreated} \\
& AdlOnARTCD4high} + I_{FNAdoHIVn} + I_{FNAdoPreART} + I_{FNAdoARTelig} + I_{FNAdoOnARTCD4low} + I_{FNAdoOnARTCD4high} + \\
& I_{IPTAdoHIVn} + I_{IPTAdoPreART} + I_{IPTAdoARTelig} + I_{IPTAdoOnARTCD4low} + I_{IPTAdoOnARTCD4high} + I_{FNAdlHIVn} + \\
& I_{FNAdlPreART} + I_{FNAdlARTelig} + I_{FNAdlOnARTCD4low} + I_{FNAdlOnARTCD4high} + I_{IPTAdlHIVn} + I_{IPTAdlPreART} + \\
& I_{IPTAdlARTelig} + I_{IPTAdlOnARTCD4low} + I_{IPTAdlOnARTCD4high})) + \gamma_{CT} * I_{CTAdlHIVn} + \kappa_{IPT} * R_{AdlHIVn} - \\
& \mu_{nat} * S_{AdlHIVn}
\end{aligned}$$

$$\begin{aligned}
dS_{AdlPreART} = & \varepsilon * S_{AdoPreART} + S_{AdlHIVn} * \beta_{HIVInfAdl} * ((S_{AdoPreART} + S_{AdoARTelig} + L_{nottreatedAdoPreART} + \\
& L_{nottreatedAdoARTelig} + L_{IPTAdoPreART} + L_{IPTAdoARTelig} + I_{nottreatedAdoPreART} + I_{nottreatedAdoARTelig} + \\
& I_{CTAdoPreART} + I_{CTAdoARTelig} + S_{AdlPreART} + S_{AdlARTelig} + L_{nottreatedAdlPreART} + L_{nottreatedAdlARTelig} + \\
& L_{IPTAdlPreART} + L_{IPTAdlARTelig} + I_{nottreatedAdlPreART} + I_{nottreatedAdlARTelig} + I_{CTAdlPreART} + I_{CTAdlARTelig} + \\
& I_{FNAdoPreART} + I_{FNAdoARTelig} + I_{IPTAdoPreART} + I_{IPTAdoARTelig} + I_{FNAdlPreART} + I_{FNAdlARTelig} + I_{IPTAdlPreART} \\
& + I_{IPTAdlARTelig} + R_{AdoPreART} + R_{AdoARTelig})) - progHIV * S_{AdlPreART} - \\
& \beta_{TBAdl} * S_{AdlPreART} * ((I_{nottreatedAdoHIVn} + I_{nottreatedAdoPreART} + I_{nottreatedAdoARTelig} + I_{nottreatedAdoOnARTCD4low} + I_{nottreatedAdoOnARTCD4high} + I_{nottreatedAdlHIVn} + I_{nottreatedAdlPreART} + I_{nottreatedAdlARTelig} + I_{nottreatedAdlOnARTCD4low} + I_{nottreatedAdlOnARTCD4high} + I_{FNAdoHIVn} + I_{FNAdoPreART} + I_{FNAdoARTelig} + I_{FNAdoOnARTCD4low} + I_{FNAdoOnARTCD4high} + I_{IPTAdoHIVn} + I_{IPTAdoPreART} + I_{IPTAdoARTelig} + I_{IPTAdoOnARTCD4low} + I_{IPTAdoOnARTCD4high} + I_{FNAdlHIVn} + I_{FNAdlPreART} + I_{FNAdlARTelig} + I_{FNAdlOnARTCD4low} + I_{FNAdlOnARTCD4high} + I_{IPTAdlHIVn} + I_{IPTAdlPreART} + I_{IPTAdlARTelig} + I_{IPTAdlOnARTCD4low} + I_{IPTAdlOnARTCD4high})) + \\
& \gamma_{CT} * I_{CTAdlPreART} + \kappa_{IPT} * R_{AdlPreART} - \mu_{PreARTAdl} * S_{AdlPreART}
\end{aligned}$$

$$\begin{aligned}
dS_{AdlARTelig} = & \varepsilon * S_{AdoARTelig} + \zeta_{HIV} * S_{AdlPreART} - \eta_{HIV} * S_{AdlARTelig} - \\
& \beta_{TBAdl} * S_{AdlARTelig} * ((I_{nottreatedAdoHIVn} + I_{nottreatedAdoPreART} + I_{nottreatedAdoARTelig} + I_{nottreatedAdoOnARTCD4low} + I_{nottreatedAdoOnARTCD4high} + I_{nottreatedAdlHIVn} + I_{nottreatedAdlPreART} + I_{nottreatedAdlARTelig} + I_{nottreatedAdlOnARTCD4low} + I_{nottreatedAdlOnARTCD4high} + I_{FNAdoHIVn} + I_{FNAdoPreART} + I_{FNAdoARTelig} + I_{FNAdoOnARTCD4low} + I_{FNAdoOnARTCD4high} + I_{IPTAdoHIVn} + I_{IPTAdoPreART} + I_{IPTAdoARTelig} + I_{IPTAdoOnARTCD4low} + I_{IPTAdoOnARTCD4high} + I_{FNAdlHIVn} + I_{FNAdlPreART} + I_{FNAdlARTelig} + I_{FNAdlOnARTCD4low} + I_{FNAdlOnARTCD4high} + I_{IPTAdlHIVn} + I_{IPTAdlPreART} + I_{IPTAdlARTelig} + I_{IPTAdlOnARTCD4low} + I_{IPTAdlOnARTCD4high})) + \gamma_{CT} * I_{CTAdlARTelig} + \kappa_{IPT} * R_{AdlARTelig} - \\
& \mu_{ARTeligAdl} * S_{AdlARTelig}
\end{aligned}$$

$$\begin{aligned}
dS_{AdlOnARTCD4low} = & \varepsilon * S_{AdoOnARTCD4low} + \eta_{HIV} * S_{AdlARTelig} - \theta_{HIV} * S_{AdlOnARTCD4low} - \\
& \beta_{TBAdl} * S_{AdlOnARTCD4low} * ((I_{nottreatedAdoHIVn} + I_{nottreatedAdoPreART} + I_{nottreatedAdoARTelig} + I_{nottreatedAdoOnARTCD4low} + I_{nottreatedAdoOnARTCD4high} + I_{nottreatedAdlHIVn} + I_{nottreatedAdlPreART} + I_{nottreatedAdlARTelig} + I_{nottreatedAdlOnARTCD4low} + I_{nottreatedAdlOnARTCD4high} + I_{FNAdoHIVn} + I_{FNAdoPreART} + I_{FNAdoARTelig} + I_{FNAdoOnARTCD4low} + I_{FNAdoOnARTCD4high} + I_{IPTAdoHIVn} + I_{IPTAdoPreART} + I_{IPTAdoARTelig} + I_{IPTAdoOnARTCD4low} + I_{IPTAdoOnARTCD4high} + I_{FNAdlHIVn} + I_{FNAdlPreART} + I_{FNAdlARTelig} + I_{FNAdlOnARTCD4low} + I_{FNAdlOnARTCD4high} + I_{IPTAdlHIVn} + I_{IPTAdlPreART} + I_{IPTAdlARTelig} + I_{IPTAdlOnARTCD4low} + I_{IPTAdlOnARTCD4high})) + \gamma_{CT} * I_{CTAdlOnARTCD4low} + \kappa_{IPT} * R_{AdlOnARTCD4low} - \mu_{ARTlowAdl} * S_{AdlOnARTCD4low}
\end{aligned}$$

$$\begin{aligned}
dS_{AdlOnARTCD4high} = & \varepsilon * S_{AdoOnARTCD4high} + \theta_{HIV} * S_{AdlOnARTCD4low} - \\
& \beta_{TBAdl} * S_{AdlOnARTCD4high} * ((I_{nottreatedAdoHIVn} + I_{nottreatedAdoPreART} + I_{nottreatedAdoARTelig} + I_{nottreatedAdoOnARTCD4low} + I_{nottreatedAdoOnARTCD4high} + I_{nottreatedAdlHIVn} + I_{nottreatedAdlPreART} + I_{nottreatedAdlARTelig} + I_{nottreatedAdlOnARTCD4low}
\end{aligned}$$

$$\begin{aligned}
& + I_{\text{nottreatedAdlOnARTCD4high}} + I_{\text{FNAdoHIVn}} + I_{\text{FNAdoPreART}} + I_{\text{FNAdoARTelig}} + I_{\text{FNAdoOnARTCD4low}} + \\
& I_{\text{FNAdoOnARTCD4high}} + I_{\text{IPTAdoHIVn}} + I_{\text{IPTAdoPreART}} + I_{\text{IPTAdoARTelig}} + I_{\text{IPTAdoOnARTCD4low}} + \\
& I_{\text{IPTAdoOnARTCD4high}} + I_{\text{FNAdIHIVn}} + I_{\text{FNAdIPreART}} + I_{\text{FNAdIARTelig}} + I_{\text{FNAdIOnARTCD4low}} + I_{\text{FNAdIOnARTCD4high}} \\
& + I_{\text{IPTAdIHIVn}} + I_{\text{IPTAdIPreART}} + I_{\text{IPTAdIARTelig}} + I_{\text{IPTAdIOnARTCD4low}} + I_{\text{IPTAdIOnARTCD4high}})) + \\
& \gamma_{\text{CT}} * I_{\text{CTAdIOnARTCD4high}} + \kappa_{\text{IPT}} * R_{\text{AdIOnARTCD4high}} - \mu_{\text{ARThighAdl}} * S_{\text{AdIOnARTCD4high}}
\end{aligned}$$

$$\begin{aligned}
dR_{\text{AdIHIVn}} = & -R_{\text{AdIHIVn}} * \beta_{\text{HIVInfAdl}} * ((S_{\text{AdoPreART}} + S_{\text{AdoARTelig}} + L_{\text{nottreatedAdoPreART}} + L_{\text{nottreatedAdoARTelig}} + \\
& L_{\text{IPTAdoPreART}} + L_{\text{IPTAdoARTelig}} + I_{\text{nottreatedAdoPreART}} + I_{\text{nottreatedAdoARTelig}} + I_{\text{CTAdoPreART}} + I_{\text{CTAdoARTelig}} + \\
& S_{\text{AdIPreART}} + S_{\text{AdIARTelig}} + L_{\text{nottreatedAdIPreART}} + L_{\text{nottreatedAdIARTelig}} + L_{\text{IPTAdIPreART}} + L_{\text{IPTAdIARTelig}} + \\
& I_{\text{nottreatedAdIPreART}} + I_{\text{nottreatedAdIARTelig}} + I_{\text{CTAdIPreART}} + I_{\text{CTAdIARTelig}} + I_{\text{FNAdoPreART}} + I_{\text{FNAdoARTelig}} + \\
& I_{\text{IPTAdoPreART}} + I_{\text{IPTAdoARTelig}} + I_{\text{FNAdIPreART}} + I_{\text{FNAdIARTelig}} + I_{\text{IPTAdIPreART}} + I_{\text{IPTAdIARTelig}} + R_{\text{AdoPreART}} \\
& + R_{\text{AdoARTelig}})) - \\
& \beta_{\text{TBadl}} * R_{\text{AdIHIVn}} * ((I_{\text{nottreatedAdoHIVn}} + I_{\text{nottreatedAdoPreART}} + I_{\text{nottreatedAdoARTelig}} + I_{\text{nottreatedAdoOnARTCD4low}} + I_{\text{nottrea}} \\
& \text{tedAdoOnARTCD4high}} + I_{\text{nottreatedAdIHIVn}} + I_{\text{nottreatedAdIPreART}} + I_{\text{nottreatedAdIARTelig}} + I_{\text{nottreatedAdIOnARTCD4low}} + I_{\text{nottrea}} \\
& \text{tedAdIOnARTCD4high}} + I_{\text{FNAdoHIVn}} + I_{\text{FNAdoPreART}} + I_{\text{FNAdoARTelig}} + I_{\text{FNAdoOnARTCD4low}} + I_{\text{FNAdoOnARTCD4high}} \\
& + I_{\text{IPTAdoHIVn}} + I_{\text{IPTAdoPreART}} + I_{\text{IPTAdoARTelig}} + I_{\text{IPTAdoOnARTCD4low}} + I_{\text{IPTAdoOnARTCD4high}} + I_{\text{FNAdIHIVn}} + \\
& I_{\text{FNAdIPreART}} + I_{\text{FNAdIARTelig}} + I_{\text{FNAdIOnARTCD4low}} + I_{\text{FNAdIOnARTCD4high}} + I_{\text{IPTAdIHIVn}} + I_{\text{IPTAdIPreART}} + \\
& I_{\text{IPTAdIARTelig}} + I_{\text{IPTAdIOnARTCD4low}} + I_{\text{IPTAdIOnARTCD4high}})) + \gamma_{\text{IPT}} * L_{\text{IPTAdIHIVn}} - \kappa_{\text{IPT}} * R_{\text{AdIHIVn}} + \\
& \varepsilon * R_{\text{AdoHIVn}} - \mu_{\text{nat}} * R_{\text{AdIHIVn}}
\end{aligned}$$

$$\begin{aligned}
dR_{\text{AdIPreART}} = & R_{\text{AdIHIVn}} * \beta_{\text{HIVinfadl}} * ((S_{\text{AdoPreART}} + S_{\text{AdoARTelig}} + L_{\text{nottreatedAdoPreART}} + L_{\text{nottreatedAdoARTelig}} + \\
& L_{\text{IPTAdoPreART}} + L_{\text{IPTAdoARTelig}} + I_{\text{nottreatedAdoPreART}} + I_{\text{nottreatedAdoARTelig}} + I_{\text{CTAdoPreART}} + I_{\text{CTAdoARTelig}} + \\
& S_{\text{AdIPreART}} + S_{\text{AdIARTelig}} + L_{\text{nottreatedAdIPreART}} + L_{\text{nottreatedAdIARTelig}} + L_{\text{IPTAdIPreART}} + L_{\text{IPTAdIARTelig}} + \\
& I_{\text{nottreatedAdIPreART}} + I_{\text{nottreatedAdIARTelig}} + I_{\text{CTAdIPreART}} + I_{\text{CTAdIARTelig}} + I_{\text{FNAdoPreART}} + I_{\text{FNAdoARTelig}} + \\
& I_{\text{IPTAdoPreART}} + I_{\text{IPTAdoARTelig}} + I_{\text{FNAdIPreART}} + I_{\text{FNAdIARTelig}} + I_{\text{IPTAdIPreART}} + I_{\text{IPTAdIARTelig}} + R_{\text{AdoPreART}} \\
& + R_{\text{AdoARTelig}})) - \\
& \beta_{\text{TBadl}} * R_{\text{AdIPreART}} * ((I_{\text{nottreatedAdoHIVn}} + I_{\text{nottreatedAdoPreART}} + I_{\text{nottreatedAdoARTelig}} + I_{\text{nottreatedAdoOnARTCD4low}} + I_{\text{nottrea}} \\
& \text{tedAdoOnARTCD4high}} + I_{\text{nottreatedAdIHIVn}} + I_{\text{nottreatedAdIPreART}} + I_{\text{nottreatedAdIARTelig}} + I_{\text{nottreatedAdIOnARTCD4low}} + I_{\text{nottrea}} \\
& \text{tedAdIOnARTCD4high}} + I_{\text{FNAdoHIVn}} + I_{\text{FNAdoPreART}} + I_{\text{FNAdoARTelig}} + I_{\text{FNAdoOnARTCD4low}} + I_{\text{FNAdoOnARTCD4high}} \\
& + I_{\text{IPTAdoHIVn}} + I_{\text{IPTAdoPreART}} + I_{\text{IPTAdoARTelig}} + I_{\text{IPTAdoOnARTCD4low}} + I_{\text{IPTAdoOnARTCD4high}} + I_{\text{FNAdIHIVn}} + \\
& I_{\text{FNAdIPreART}} + I_{\text{FNAdIARTelig}} + I_{\text{FNAdIOnARTCD4low}} + I_{\text{FNAdIOnARTCD4high}} + I_{\text{IPTAdIHIVn}} + I_{\text{IPTAdIPreART}} + \\
& I_{\text{IPTAdIARTelig}} + I_{\text{IPTAdIOnARTCD4low}} + I_{\text{IPTAdIOnARTCD4high}})) - \zeta_{\text{HIV}} * R_{\text{AdIPreART}} + \gamma_{\text{IPT}} * L_{\text{IPTAdIPreART}} - \\
& \kappa_{\text{IPT}} * R_{\text{AdIPreART}} + \varepsilon * R_{\text{AdoPreART}} - \mu_{\text{PreARTAdl}} * R_{\text{AdIPreART}}
\end{aligned}$$

$$\begin{aligned}
dR_{\text{AdIARTelig}} = & \zeta_{\text{HIV}} * R_{\text{AdIPreART}} - \eta_{\text{HIV}} * R_{\text{AdIARTelig}} + \gamma_{\text{IPT}} * L_{\text{IPTAdIARTelig}} - \kappa_{\text{IPT}} * R_{\text{AdIARTelig}} + \\
& \varepsilon * R_{\text{AdoARTelig}} - \mu_{\text{ARTeligAdl}} * R_{\text{AdIARTelig}}
\end{aligned}$$

$$dR_{AdlOnARTCD4low} = \eta_{HIV} * R_{AdlARTelig} - \theta_{HIV} * R_{AdlOnARTCD4low} + \gamma_{IPT} * L_{IPTAdlOnARTCD4low} - \kappa_{IPT} * R_{AdlOnARTCD4low} + \text{agingtwo} * R_{AdoOnARTCD4low} - \eta_{ARTlowAdl} * R_{AdlOnARTCD4low}$$

$$dR_{AdlOnARTCD4high} = \theta_{HIV} * R_{AdlOnARTCD4low} + \gamma_{IPT} * L_{IPTAdlOnARTCD4high} - \kappa_{IPT} * R_{AdlOnARTCD4high} + \varepsilon * R_{AdoOnARTCD4high} - \mu_{ARThighAdl} * R_{AdlOnARTCD4high}$$

$$\begin{aligned} dL_{nottreatedAdlHIVn} = & \varepsilon * L_{nottreatedAdoHIVn} - L_{nottreatedAdlHIVn} * \beta_{HIVinfadl} * ((S_{AdoPreART} + S_{AdoARTelig} + \\ & L_{nottreatedAdoPreART} + L_{nottreatedAdoARTelig} + L_{IPTAdoPreART} + L_{IPTAdoARTelig} + I_{nottreatedAdoPreART} + \\ & I_{nottreatedAdoARTelig} + I_{CTAdoPreART} + I_{CTAdoARTelig} + S_{AdlPreART} + S_{AdlARTelig} + L_{nottreatedAdlPreART} + \\ & L_{nottreatedAdlARTelig} + L_{IPTAdlPreART} + L_{IPTAdlARTelig} + I_{nottreatedAdlPreART} + I_{nottreatedAdlARTelig} + I_{CTAdlPreART} \\ & + I_{CTAdlARTelig} + I_{FNAdoPreART} + I_{FNAdoARTelig} + I_{IPTAdoPreART} + I_{IPTAdoARTelig} + I_{FNAdlPreART} + \\ & I_{FNAdlARTelig} + I_{IPTAdlPreART} + I_{IPTAdlARTelig} + R_{AdoPreART} + R_{AdoARTelig})) \\ & + \beta_{TBadl} * \rho_{TBinfHIVn} * S_{AdlHIVn} * ((I_{nottreatedAdoHIVn} + I_{nottreatedAdoPreART} + I_{nottreatedAdoARTelig} + I_{nottreatedAdoOnART} \\ & CD4low + I_{nottreatedAdoOnARTCD4high} + I_{nottreatedAdlHIVn} + I_{nottreatedAdlPreART} + I_{nottreatedAdlARTelig} + I_{nottreatedAdlOnART} \\ & CD4low + I_{nottreatedAdlOnARTCD4high} + I_{FNAdoHIVn} + I_{FNAdoPreART} + I_{FNAdoARTelig} + I_{FNAdoOnARTCD4low} + \\ & I_{FNAdoOnARTCD4high} + I_{IPTAdoHIVn} + I_{IPTAdoPreART} + I_{IPTAdoARTelig} + I_{IPTAdoOnARTCD4low} + \\ & I_{IPTAdoOnARTCD4high} + I_{FNAdlHIVn} + I_{FNAdlPreART} + I_{FNAdlARTelig} + I_{FNAdlOnARTCD4low} + I_{FNAdlOnARTCD4high} \\ & + I_{IPTAdlHIVn} + I_{IPTAdlPreART} + I_{IPTAdlARTelig} + I_{IPTAdlOnARTCD4low} + I_{IPTAdlOnARTCD4high})) - \\ & \xi_{AdlHIVn} * L_{nottreatedAdlHIVn} - (a * (1 - \\ & \rho_{TBinfHIVn}) * \beta_{TBadl} * L_{nottreatedAdlHIVn} * (I_{nottreatedAdoHIVn} + I_{nottreatedAdoPreART} + I_{nottreatedAdoARTelig} + I_{nottreatedAdoOn} \\ & nARTCD4low + I_{nottreatedAdoOnARTCD4high} + I_{nottreatedAdlHIVn} + I_{nottreatedAdlPreART} + I_{nottreatedAdlARTelig} + I_{nottreatedAdlOn} \\ & ARTCD4low + I_{nottreatedAdlOnARTCD4high} + I_{FNAdoHIVn} + I_{FNAdoPreART} + I_{FNAdoARTelig} + I_{FNAdoOnARTCD4low} + \\ & I_{FNAdoOnARTCD4high} + I_{IPTAdoHIVn} + I_{IPTAdoPreART} + I_{IPTAdoARTelig} + I_{IPTAdoOnARTCD4low} + \\ & I_{IPTAdoOnARTCD4high} + I_{FNAdlHIVn} + I_{FNAdlPreART} + I_{FNAdlARTelig} + I_{FNAdlOnARTCD4low} + I_{FNAdlOnARTCD4high} \\ & + I_{IPTAdlHIVn} + I_{IPTAdlPreART} + I_{IPTAdlARTelig} + I_{IPTAdlOnARTCD4low} + I_{IPTAdlOnARTCD4high})) + \\ & (\tau_{AdlHIVn} * L_{nottreatedAdlHIVn})) + \psi * I_{CTAdlHIVn} - \mu_{nat} * L_{nottreatedAdlHIVn} + \varphi * I_{nottreatedAdlHIVn} + \\ & \iota_{IPT} * L_{IPTAdlHIVn} - L_{nottreatedAdlHIVn} * \vartheta_{HIVn} \end{aligned}$$

$$\begin{aligned} dL_{nottreatedAdlPreART} = & \varepsilon * L_{nottreatedAdoPreART} + L_{nottreatedAdlPreART} * \beta_{HIVinfadl} * ((S_{AdoPreART} + S_{AdoARTelig} + \\ & L_{nottreatedAdoPreART} + L_{nottreatedAdoARTelig} + L_{IPTAdoPreART} + L_{IPTAdoARTelig} + I_{nottreatedAdoPreART} + \\ & I_{nottreatedAdoARTelig} + I_{CTAdoPreART} + I_{CTAdoARTelig} + S_{AdlPreART} + S_{AdlARTelig} + L_{nottreatedAdlPreART} + \\ & L_{nottreatedAdlARTelig} + L_{IPTAdlPreART} + L_{IPTAdlARTelig} + I_{nottreatedAdlPreART} + I_{nottreatedAdlARTelig} + I_{CTAdlPreART} \\ & + I_{CTAdlARTelig} + I_{FNAdoPreART} + I_{FNAdoARTelig} + I_{IPTAdoPreART} + I_{IPTAdoARTelig} + I_{FNAdlPreART} + \\ & I_{FNAdlARTelig} + I_{IPTAdlPreART} + I_{IPTAdlARTelig} + R_{AdoPreART} + R_{AdoARTelig})) - \\ & \zeta_{HIV} * L_{nottreatedAdlPreART} + \beta_{TBadl} * \rho_{TBinfHIVp} * S_{AdlPreART} * ((I_{nottreatedAdoHIVn} + I_{nottreatedAdoPreART} + I_{nottreatedAdo} \end{aligned}$$





$$\begin{aligned}
& I_{IPTAdoOnARTCD4high} + I_{FNAdIHIVn} + I_{FNAdlPreART} + I_{FNAdlARTelig} + I_{FNAdlOnARTCD4low} + I_{FNAdlOnARTCD4high} \\
& + I_{IPTAdIHIVn} + I_{IPTAdlPreART} + I_{IPTAdlARTelig} + I_{IPTAdlOnARTCD4low} + I_{IPTAdlOnARTCD4high}) - \\
& \xi_{Adl} * L_{nottreatedAdlOnARTCD4low} - (a * (1 - \rho_{TBinfHIVART}) * \beta \\
& T_{Badl} * L_{nottreatedAdlOnARTCD4low} * (I_{nottreatedAdoHIVn} + I_{nottreatedAdoPreART} + I_{nottreatedAdoARTelig} + I_{nottreatedAdoOnARTCD4low} \\
& + I_{nottreatedAdoOnARTCD4high} + I_{nottreatedAdIHIVn} + I_{nottreatedAdlPreART} + I_{nottreatedAdlARTelig} + I_{nottreatedAdlOnARTCD4low} \\
& + I_{nottreatedAdlOnARTCD4high} + I_{FNAdoHIVn} + I_{FNAdoPreART} + I_{FNAdoARTelig} + I_{FNAdoOnARTCD4low} + \\
& I_{FNAdoOnARTCD4high} + I_{IPTAdoHIVn} + I_{IPTAdoPreART} + I_{IPTAdoARTelig} + I_{IPTAdoOnARTCD4low} + \\
& I_{IPTAdoOnARTCD4high} + I_{FNAdIHIVn} + I_{FNAdlPreART} + I_{FNAdlARTelig} + I_{FNAdlOnARTCD4low} + I_{FNAdlOnARTCD4high} \\
& + I_{IPTAdIHIVn} + I_{IPTAdlPreART} + I_{IPTAdlARTelig} + I_{IPTAdlOnARTCD4low} + I_{IPTAdlOnARTCD4high}) + \\
& (\tau_{AdIHIVART} * L_{nottreatedAdlOnARTCD4low})) + \psi * I_{CTAdlARTelig} - \mu_{ARTlowAdl} * L_{nottreatedAdlOnARTCD4low} + \\
& \phi * I_{nottreatedAdlOnARTCD4low} + \upsilon_{IPT} * L_{IPTAdlOnARTCD4low} - L_{nottreatedAdlOnARTCD4low} * \mathcal{G}_{ART}
\end{aligned}$$

$$\begin{aligned}
dL_{nottreatedAdlOnARTCD4high} = & \varepsilon * L_{nottreatedAdoOnARTCD4high} + \theta_{HIV} * L_{nottreatedAdoOnARTCD4low} + \\
& \beta_{TBadl} * \rho_{TBinfHIVART} * S_{AdlOnARTCD4high} * ((I_{nottreatedAdoHIVn} + I_{nottreatedAdoPreART} + I_{nottreatedAdoARTelig} + I_{nottreatedAdoOnARTCD4low} \\
& + I_{nottreatedAdoOnARTCD4high} + I_{nottreatedAdIHIVn} + I_{nottreatedAdlPreART} + I_{nottreatedAdlARTelig} + I_{nottreatedAdlOnARTCD4low} \\
& + I_{nottreatedAdlOnARTCD4high} + I_{FNAdoHIVn} + I_{FNAdoPreART} + I_{FNAdoARTelig} + I_{FNAdoOnARTCD4low} \\
& + I_{FNAdoOnARTCD4high} + I_{IPTAdoHIVn} + I_{IPTAdoPreART} + I_{IPTAdoARTelig} + I_{IPTAdoOnARTCD4low} + \\
& I_{IPTAdoOnARTCD4high} + I_{FNAdIHIVn} + I_{FNAdlPreART} + I_{FNAdlARTelig} + I_{FNAdlOnARTCD4low} + I_{FNAdlOnARTCD4high} \\
& + I_{IPTAdIHIVn} + I_{IPTAdlPreART} + I_{IPTAdlARTelig} + I_{IPTAdlOnARTCD4low} + I_{IPTAdlOnARTCD4high})) - \\
& \xi_{Adl} * L_{nottreatedAdlOnARTCD4high} - (a * (1 - \\
& \rho_{TBinfHIVART}) * \beta_{TBadl} * L_{nottreatedAdlOnARTCD4high} * (I_{nottreatedAdoHIVn} + I_{nottreatedAdoPreART} + I_{nottreatedAdoARTelig} + I_{nottreatedAdoOnARTCD4low} \\
& + I_{nottreatedAdoOnARTCD4high} + I_{nottreatedAdIHIVn} + I_{nottreatedAdlPreART} + I_{nottreatedAdlARTelig} + I_{nottreatedAdlOnARTCD4low} \\
& + I_{nottreatedAdlOnARTCD4high} + I_{FNAdoHIVn} + I_{FNAdoPreART} + I_{FNAdoARTelig} + \\
& I_{FNAdoOnARTCD4low} + I_{FNAdoOnARTCD4high} + I_{IPTAdoHIVn} + I_{IPTAdoPreART} + I_{IPTAdoARTelig} + \\
& I_{IPTAdoOnARTCD4low} + I_{IPTAdoOnARTCD4high} + I_{FNAdIHIVn} + I_{FNAdlPreART} + I_{FNAdlARTelig} + I_{FNAdlOnARTCD4low} \\
& + I_{FNAdlOnARTCD4high} + I_{IPTAdIHIVn} + I_{IPTAdlPreART} + I_{IPTAdlARTelig} + I_{IPTAdlOnARTCD4low} + \\
& I_{IPTAdlOnARTCD4high}) + (\tau_{AdIHIVART} * L_{nottreatedAdlOnARTCD4high})) + \psi * I_{CTAdlARTelig} - \\
& \mu_{ARTHighAdl} * L_{nottreatedAdlOnARTCD4high} + \phi * I_{nottreatedAdlOnARTCD4high} + \upsilon_{IPT} * L_{IPTAdlOnARTCD4high} - \\
& L_{nottreatedAdlOnARTCD4high} * \mathcal{G}_{ART}
\end{aligned}$$

$$\begin{aligned}
dL_{IPTAdIHIVn} = & \varepsilon * L_{IPTAdoHIVn} - L_{IPTAdIHIVn} * \beta_{HIVinfAdl} * ((S_{AdoPreART} + S_{AdoARTelig} + L_{nottreatedAdoPreART} + \\
& L_{nottreatedAdoARTelig} + L_{IPTAdoPreART} + L_{IPTAdoARTelig} + I_{nottreatedAdoPreART} + I_{nottreatedAdoARTelig} + \\
& I_{CTAdoPreART} + I_{CTAdoARTelig} + S_{AdlPreART} + S_{AdlARTelig} + L_{nottreatedAdlPreART} + L_{nottreatedAdlARTelig} + \\
& L_{IPTAdlPreART} + L_{IPTAdlARTelig} + I_{nottreatedAdlPreART} + I_{nottreatedAdlARTelig} + I_{CTAdlPreART} + I_{CTAdlARTelig} + \\
& I_{FNAdoPreART} + I_{FNAdoARTelig} + I_{IPTAdoPreART} + I_{IPTAdoARTelig} + I_{FNAdlPreART} + I_{FNAdlARTelig} + I_{IPTAdlPreART} \\
& + I_{IPTAdlARTelig} + R_{AdoPreART} + R_{AdoARTelig})) + \xi_{Adl} * L_{nottreatedAdIHIVn} - ((\lambda_{HIVn} * L_{IPTAdIHIVn})) - \\
& \gamma_{IPT} * L_{IPTAdIHIVn} - \mu_{nat} * L_{IPTAdIHIVn} - \upsilon_{IPT} * L_{IPTAdIHIVn}
\end{aligned}$$

$$\begin{aligned}
dL_{IPTAdIPreART} = & \varepsilon * L_{IPTAdoPreART} + L_{IPTAdIHIVn} * \beta_{HIVInfAdI} * ((S_{AdoPreART} + S_{AdoARTelig} + \\
& L_{nottreatedAdoPreART} + L_{nottreatedAdoARTelig} + L_{IPTAdoPreART} + L_{IPTAdoARTelig} + I_{nottreatedAdoPreART} + \\
& I_{nottreatedAdoARTelig} + I_{CTAdoPreART} + I_{CTAdoARTelig} + S_{AdIPreART} + S_{AdIARTelig} + L_{nottreatedAdIPreART} + \\
& L_{nottreatedAdIARTelig} + L_{IPTAdIPreART} + L_{IPTAdIARTelig} + I_{nottreatedAdIPreART} + I_{nottreatedAdIARTelig} + I_{CTAdIPreART} \\
& + I_{CTAdIARTelig} + I_{FNAdoPreART} + I_{FNAdoARTelig} + I_{IPTAdoPreART} + I_{IPTAdoARTelig} + I_{FNAdIPreART} + \\
& I_{FNAdIARTelig} + I_{IPTAdIPreART} + I_{IPTAdIARTelig} + R_{AdoPreART} + R_{AdoARTelig})) - \zeta_{HIV} * L_{IPTAdIPreART} + \\
& \xi_{AdI} * L_{nottreatedAdIPreART} - ((\lambda_{HIVp} * L_{IPTAdIPreART})) - \gamma_{IPT} * L_{IPTAdIPreART} - \mu_{PreARTAdI} * L_{IPTAdIPreART} - \\
& \upsilon_{IPT} * L_{IPTAdIPreART}
\end{aligned}$$

$$\begin{aligned}
dL_{IPTAdIARTelig} = & \varepsilon * L_{IPTAdoARTelig} + \zeta_{HIV} * L_{IPTAdIPreART} - \eta_{HIV} * L_{IPTAdIARTelig} + \xi_{AdI} * L_{nottreatedAdIARTelig} - \\
& ((activIPTHIVp * L_{IPTAdIARTelig})) - \gamma_{IPT} * L_{IPTAdIARTelig} - \mu_{ARTeligAdI} * L_{IPTAdIARTelig} - \upsilon_{IPT} * L_{IPTAdIARTelig}
\end{aligned}$$

$$\begin{aligned}
dL_{IPTAdIOnARTCD4low} = & \varepsilon * L_{IPTAdoOnARTCD4low} + \eta_{HIV} * L_{IPTAdIARTelig} - \theta_{HIV} * L_{IPTAdIOnARTCD4low} + \\
& \xi_{AdI} * L_{nottreatedAdIOnARTCD4low} - \lambda_{HIVp} * L_{IPTAdIOnARTCD4low} - \gamma_{IPT} * L_{IPTAdIOnARTCD4low} - \\
& \mu_{ARTlowAdI} * L_{IPTAdIOnARTCD4low} - \upsilon_{IPT} * L_{IPTAdIOnARTCD4low}
\end{aligned}$$

$$\begin{aligned}
dL_{IPTAdIOnARTCD4high} = & \varepsilon * L_{IPTAdoOnARTCD4high} + \theta_{HIV} * L_{nottreatedAdIOnARTCD4low} + \\
& \xi_{AdI} * L_{nottreatedAdIOnARTCD4high} - \lambda_{HIVp} * L_{IPTAdIOnARTCD4high} - \gamma_{IPT} * L_{IPTAdIOnARTCD4high} - \\
& \mu_{ARThighAdI} * L_{IPTAdIOnARTCD4high} - \upsilon_{IPT} * L_{IPTAdIOnARTCD4high} - \kappa_{IPT} * L_{IPTAdIOnARTCD4high}
\end{aligned}$$

$$\begin{aligned}
dI_{nottreatedAdIHIVn} = & \varepsilon * I_{nottreatedAdoHIVn} - I_{nottreatedAdIHIVn} * \beta_{HIVInfAdI} * ((S_{AdoPreART} + S_{AdoARTelig} + \\
& L_{nottreatedAdoPreART} + L_{nottreatedAdoARTelig} + L_{IPTAdoPreART} + L_{IPTAdoARTelig} + I_{nottreatedAdoPreART} + \\
& I_{nottreatedAdoARTelig} + I_{CTAdoPreART} + I_{CTAdoARTelig} + S_{AdIPreART} + S_{AdIARTelig} + L_{nottreatedAdIPreART} + \\
& L_{nottreatedAdIARTelig} + L_{IPTAdIPreART} + L_{IPTAdIARTelig} + I_{nottreatedAdIPreART} + I_{nottreatedAdIARTelig} + I_{CTAdIPreART} \\
& + I_{CTAdIARTelig} + I_{FNAdoPreART} + I_{FNAdoARTelig} + I_{IPTAdoPreART} + I_{IPTAdoARTelig} + I_{FNAdIPreART} + \\
& I_{FNAdIARTelig} + I_{IPTAdIPreART} + I_{IPTAdIARTelig} + R_{AdoPreART} + R_{AdoARTelig})) + \beta_{TBadI} * (1 - \\
& \rho_{TBinfHIVn}) * S_{AdIHIVn} * ((I_{nottreatedAdoHIVn} + I_{nottreatedAdoPreART} + I_{nottreatedAdoARTelig} + I_{nottreatedAdoOnARTCD4low} + I_{n} \\
& ottreatedAdoOnARTCD4high} + I_{nottreatedAdIHIVn} + I_{nottreatedAdIPreART} + I_{nottreatedAdIARTelig} + I_{nottreatedAdIOnARTCD4low} + I_{n} \\
& ottreatedAdIOnARTCD4high} + I_{FNAdoHIVn} + I_{FNAdoPreART} + I_{FNAdoARTelig} + I_{FNAdoOnARTCD4low} + \\
& I_{FNAdoOnARTCD4high} + I_{IPTAdoHIVn} + I_{IPTAdoPreART} + I_{IPTAdoARTelig} + I_{IPTAdoOnARTCD4low} + \\
& I_{IPTAdoOnARTCD4high} + I_{FNAdIHIVn} + I_{FNAdIPreART} + I_{FNAdIARTelig} + I_{FNAdIOnARTCD4low} + I_{FNAdIOnARTCD4high} \\
& + I_{IPTAdIHIVn} + I_{IPTAdIPreART} + I_{IPTAdIARTelig} + I_{IPTAdIOnARTCD4low} + I_{IPTAdIOnARTCD4high})) + (a * (1 - \\
& \rho_{TBinfHIVn}) * \beta_{TBadI} * L_{nottreatedAdIHIVn} * (I_{nottreatedAdoHIVn} + I_{nottreatedAdoPreART} + I_{nottreatedAdoARTelig} + I_{nottreatedAdoO} \\
& nARTCD4low} + I_{nottreatedAdoOnARTCD4high} + I_{nottreatedAdIHIVn} + I_{nottreatedAdIPreART} + I_{nottreatedAdIARTelig} + I_{nottreatedAdIO}
\end{aligned}$$





$$\chi_{Adl} * I_{nottreatedAdlOnARTCD4high} - \mu_{TBARThighAdl} * I_{nottreatedAdlOnARTCD4high} - \varphi * I_{nottreatedAdlOnARTCD4high}$$

$$\begin{aligned} dI_{CTAdIHIVn} = & \varepsilon * I_{CTAdoHIVn} - I_{CTAdIHIVn} * \beta_{HIVInfAdl} * ((S_{AdoPreART} + S_{AdoARTelig} + L_{nottreatedAdoPreART} + \\ & L_{nottreatedAdoARTelig} + L_{IPTAdoPreART} + L_{IPTAdoARTelig} + I_{nottreatedAdoPreART} + I_{nottreatedAdoARTelig} + \\ & I_{CTAdoPreART} + I_{CTAdoARTelig} + S_{AdlPreART} + S_{AdlARTelig} + L_{nottreatedAdlPreART} + L_{nottreatedAdlARTelig} + \\ & L_{IPTAdlPreART} + L_{IPTAdlARTelig} + I_{nottreatedAdlPreART} + I_{nottreatedAdlARTelig} + I_{CTAdlPreART} + I_{CTAdlARTelig} + \\ & I_{FNAdoPreART} + I_{FNAdoARTelig} + I_{IPTAdoPreART} + I_{IPTAdoARTelig} + I_{FNAdlPreART} + I_{FNAdlARTelig} + I_{IPTAdlPreART} \\ & + I_{IPTAdlARTelig} + R_{AdoPreART} + R_{AdoARTelig})) + \chi_{Adl} * I_{nottreatedAdIHIVn} - \sigma * I_{CTAdIHIVn} - \gamma_{CT} * I_{CTAdIHIVn} - \\ & \psi * I_{CTAdIHIVn} + \phi * I_{IPTAdIHIVn} - \mu_{TBAdl} * I_{CTAdIHIVn} \end{aligned}$$

$$\begin{aligned} dI_{CTAdlPreART} = & \varepsilon * I_{CTAdoPreART} + I_{CTAdIHIVn} * \beta_{HIVInfAdl} * ((S_{AdoPreART} + S_{AdoARTelig} + L_{nottreatedAdoPreART} + \\ & L_{nottreatedAdoARTelig} + L_{IPTAdoPreART} + L_{IPTAdoARTelig} + I_{nottreatedAdoPreART} + I_{nottreatedAdoARTelig} + \\ & I_{CTAdoPreART} + I_{CTAdoARTelig} + S_{AdlPreART} + S_{AdlARTelig} + L_{nottreatedAdlPreART} + L_{nottreatedAdlARTelig} + \\ & L_{IPTAdlPreART} + L_{IPTAdlARTelig} + I_{nottreatedAdlPreART} + I_{nottreatedAdlARTelig} + I_{CTAdlPreART} + I_{CTAdlARTelig} + \\ & I_{FNAdoPreART} + I_{FNAdoARTelig} + I_{IPTAdoPreART} + I_{IPTAdoARTelig} + I_{FNAdlPreART} + I_{FNAdlARTelig} + I_{IPTAdlPreART} \\ & + I_{IPTAdlARTelig} + R_{AdoPreART} + R_{AdoARTelig})) - \zeta_{HIV} * I_{CTAdlPreART} + \chi_{Adl} * I_{nottreatedAdlPreART} - \\ & \sigma * I_{CTAdlPreART} - \gamma_{CT} * I_{CTAdlPreART} - \psi * I_{CTAdlPreART} - \mu_{TBPreARTAdl} * I_{CTAdlPreART} \end{aligned}$$

$$\begin{aligned} dI_{CTAdlARTelig} = & \varepsilon * I_{CTAdoARTelig} + \zeta_{HIV} * I_{CTAdlPreART} - \eta_{HIV} * I_{CTAdlARTelig} + \chi_{Adl} * I_{nottreatedAdlARTelig} - \\ & \sigma * I_{CTAdlARTelig} - \gamma_{CT} * I_{CTAdlARTelig} - \psi * I_{CTAdlARTelig} + \phi * I_{IPTAdlPreART} - \mu_{TBARTeligAdl} * I_{CTAdlARTelig} \end{aligned}$$

$$\begin{aligned} dI_{CTAdlOnARTCD4low} = & \varepsilon * I_{CTAdoOnARTCD4low} + \eta_{HIV} * I_{CTAdlARTelig} - \theta_{HIV} * I_{CTAdlOnARTCD4low} \\ & + \chi_{Adl} * I_{nottreatedAdlOnARTCD4low} - \text{noncureCT} * I_{CTAdlOnARTCD4low} - \theta_{CT} * I_{CTAdlOnARTCD4low} - \\ & \psi * I_{CTAdlOnARTCD4low} + \phi * I_{IPTAdlOnARTCD4low} - \mu_{TBARTlowAdl} * I_{CTAdlOnARTCD4low} \end{aligned}$$

$$\begin{aligned} dI_{CTAdlOnARTCD4high} = & \varepsilon * I_{CTAdoOnARTCD4high} + \theta_{HIV} * I_{CTAdlOnARTCD4low} + \chi_{Adl} * I_{nottreatedAdlOnARTCD4high} - \\ & \sigma_{CT} * I_{CTAdlOnARTCD4high} - \gamma_{CT} * I_{CTAdlOnARTCD4high} - \psi * I_{CTAdlOnARTCD4high} + \phi * I_{IPTAdlOnARTCD4high} - \\ & \mu_{TBARThighAdl} * I_{CTAdlOnARTCD4high} \end{aligned}$$

$$\begin{aligned} dI_{FNAdIHIVn} = & -I_{FNAdIHIVn} * \beta_{HIVInfAdl} * ((S_{AdoPreART} + S_{AdoARTelig} + L_{nottreatedAdoPreART} + \\ & L_{nottreatedAdoARTelig} + L_{IPTAdoPreART} + L_{IPTAdoARTelig} + I_{nottreatedAdoPreART} + I_{nottreatedAdoARTelig} + \\ & I_{CTAdoPreART} + I_{CTAdoARTelig} + S_{AdlPreART} + S_{AdlARTelig} + L_{nottreatedAdlPreART} + L_{nottreatedAdlARTelig} + \\ & L_{IPTAdlPreART} + L_{IPTAdlARTelig} + I_{nottreatedAdlPreART} + I_{nottreatedAdlARTelig} + I_{CTAdlPreART} + I_{CTAdlARTelig} + \end{aligned}$$

$$I_{FNAdoPreART} + I_{FNAdoARTelig} + I_{IPTAdoPreART} + I_{IPTAdoARTelig} + I_{FNAdlPreART} + I_{FNAdlARTelig} + I_{IPTAdlPreART} + I_{IPTAdlARTelig} + R_{AdoPreART} + R_{AdoARTelig}) + L_{nottreatedAdlHIVn} * \vartheta_{HIVn} - I_{FNAdlHIVn} * \xi_{Adl} + \varepsilon * I_{FNAdlHIVn} - \mu_{TBAdl} * I_{FNAdlHIVn}$$

$$dI_{FNAdlPreART} = I_{FNAdlHIVn} * \beta_{HIVInfAdl} * ((S_{AdoPreART} + S_{AdoARTelig} + L_{nottreatedAdoPreART} + L_{nottreatedAdoARTelig} + L_{IPTAdoPreART} + L_{IPTAdoARTelig} + I_{nottreatedAdoPreART} + I_{nottreatedAdoARTelig} + I_{CTAdoPreART} + I_{CTAdoARTelig} + S_{AdlPreART} + S_{AdlARTelig} + L_{nottreatedAdlPreART} + L_{nottreatedAdlARTelig} + L_{IPTAdlPreART} + L_{IPTAdlARTelig} + I_{nottreatedAdlPreART} + I_{nottreatedAdlARTelig} + I_{CTAdlPreART} + I_{CTAdlARTelig} + I_{FNAdoPreART} + I_{FNAdoARTelig} + I_{IPTAdoPreART} + I_{IPTAdoARTelig} + I_{FNAdlPreART} + I_{FNAdlARTelig} + I_{IPTAdlPreART} + I_{IPTAdlARTelig} + R_{AdoPreART} + R_{AdoARTelig})) - \zeta_{HIV} * I_{FNAdlPreART} + L_{nottreatedAdlPreART} * \vartheta_{HIVp} - I_{FNAdlPreART} * \xi_{Adl} + \varepsilon * I_{FNAdlPreART} - \mu_{TBPreARTAdl} * I_{FNAdlPreART}$$

$$dI_{FNAdlARTelig} = \zeta_{HIV} * I_{FNAdlPreART} - \eta_{HIV} * I_{FNAdlARTelig} + L_{nottreatedAdlARTelig} * \vartheta_{HIVp} - I_{FNAdlARTelig} * \xi_{Adl} + \varepsilon * I_{FNAdlARTelig} - \mu_{TBARTeligAdl} * I_{FNAdlARTelig}$$

$$dI_{FNAdlOnARTCD4low} = \eta_{HIV} * I_{FNAdlARTelig} - \theta_{HIV} * I_{FNAdlOnARTCD4low} + L_{nottreatedAdlOnARTCD4low} * \vartheta_{ART} - I_{FNAdlOnARTCD4low} * \xi_{Adl} + \varepsilon * I_{FNAdlOnARTCD4low} - \mu_{TBARTlowAdl} * I_{FNAdlOnARTCD4low}$$

$$dI_{FNAdlOnARTCD4high} = \theta_{HIV} * I_{FNAdlOnARTCD4low} + L_{nottreatedAdlOnARTCD4high} * \vartheta_{ART} - I_{FNAdlOnARTCD4high} * IPTtoacivesAdl + \varepsilon * I_{FNAdlOnARTCD4high} - \mu_{TBARThighAdl} * I_{FNAdlOnARTCD4high}$$

$$dI_{IPTAdlHIVn} = -I_{IPTAdlHIVn} * \beta_{HIVInfAdl} * ((S_{AdoPreART} + S_{AdoARTelig} + L_{nottreatedAdoPreART} + L_{nottreatedAdoARTelig} + L_{IPTAdoPreART} + L_{IPTAdoARTelig} + I_{nottreatedAdoPreART} + I_{nottreatedAdoARTelig} + I_{CTAdoPreART} + I_{CTAdoARTelig} + S_{AdlPreART} + S_{AdlARTelig} + L_{nottreatedAdlPreART} + L_{nottreatedAdlARTelig} + L_{IPTAdlPreART} + L_{IPTAdlARTelig} + I_{nottreatedAdlPreART} + I_{nottreatedAdlARTelig} + I_{CTAdlPreART} + I_{CTAdlARTelig} + I_{FNAdoPreART} + I_{FNAdoARTelig} + I_{IPTAdoPreART} + I_{IPTAdoARTelig} + I_{FNAdlPreART} + I_{FNAdlARTelig} + I_{IPTAdlPreART} + I_{IPTAdlARTelig} + R_{AdoPreART} + R_{AdoARTelig})) + I_{FNAdlHIVn} * \xi_{Adl} - \phi * I_{IPTAdlHIVn} + ((\lambda_{HIVn} * L_{IPTAdlHIVn})) + \varepsilon * I_{IPTAdlHIVn} - \mu_{TBAdl} * I_{IPTAdlHIVn}$$

$$dI_{IPTAdlPreART} = I_{IPTAdlHIVn} * \beta_{HIVInfAdl} * (S_{AdoPreART} + S_{AdoARTelig} + L_{nottreatedAdoPreART} + L_{nottreatedAdoARTelig} + L_{IPTAdoPreART} + L_{IPTAdoARTelig} + I_{nottreatedAdoPreART} + I_{nottreatedAdoARTelig} + I_{CTAdoPreART} + I_{CTAdoARTelig} + S_{AdlPreART} + S_{AdlARTelig} + L_{nottreatedAdlPreART} + L_{nottreatedAdlARTelig} + L_{IPTAdlPreART} + L_{IPTAdlARTelig} + I_{nottreatedAdlPreART} + I_{nottreatedAdlARTelig} + I_{CTAdlPreART} + I_{CTAdlARTelig} +$$

$$I_{FNAdoPreART} + I_{FNAdoARTelig} + I_{IPTAdoPreART} + I_{IPTAdoARTelig} + I_{FNAdlPreART} + I_{FNAdlARTelig} + I_{IPTAdlPreART} + I_{IPTAdlARTelig} + R_{AdoPreART} + R_{AdoARTelig} - \zeta_{HIV} * I_{IPTAdlPreART} + I_{FNAdlPreART} * \xi_{Adl} - \phi * I_{IPTAdlPreART} + ((\lambda_{HIVp} * L_{IPTAdlPreART})) + \varepsilon * I_{IPTAdlPreART} - \mu_{TBPreARTAdl} * I_{IPTAdlPreART}$$

$$dI_{IPTAdlARTelig} = \zeta_{HIV} * I_{IPTAdlPreART} - \eta_{HIV} * I_{IPTAdlARTelig} + I_{FNAdlARTelig} * I_{PTtoacivesAdl} - \phi * I_{IPTAdlARTelig} + ((\text{activIPT} * L_{IPTAdlARTelig})) + \varepsilon * I_{IPTAdlARTelig} - \mu_{TBARTeligAdl} * I_{IPTAdlARTelig}$$

$$dI_{IPTAdlOnARTCD4low} = \eta_{HIV} * I_{IPTAdlARTelig} - \theta_{HIV} * I_{IPTAdlOnARTCD4low} + I_{FNAdlOnARTCD4low} * I_{PTtoacivesAdl} - \phi * I_{IPTAdlOnARTCD4low} + ((\lambda_{HIVp} * L_{IPTAdlOnARTCD4low})) + \varepsilon * I_{IPTAdlOnARTCD4low} - \mu_{TBARTlowAdl} * I_{IPTAdlOnARTCD4low}$$

$$dI_{IPTAdlOnARTCD4high} = \theta_{HIV} * I_{IPTAdlOnARTCD4low} + I_{FNAdlOnARTCD4high} * \xi_{Adl} - \phi * I_{IPTAdlOnARTCD4high} + ((\lambda_{HIVp} * L_{IPTAdlOnARTCD4high})) + \varepsilon * I_{IPTAdlOnARTCD4high} - \mu_{TBARThighAdl} * I_{IPTAdlOnARTCD4high}$$

## Works Cited

1. Abu-raddad, L. J., Sabatelli, L., Achterberg, J. T., Sugimoto, J. D. & Longini, I. M. Epidemiological benefits of more-effective tuberculosis vaccines , drugs , and diagnostics. (2009).
2. Suthar, A. B. *et al.* Antiretroviral therapy for prevention of tuberculosis in adults with hiv: A systematic review and meta-analysis. *PLoS Med.* **9**, (2012).
3. Horsburgh, C. R. Priorities for the treatment of latent tuberculosis infection in the United States. *N. Engl. J. Med.* **350**, 2060–7 (2004).
4. WHO. *Global Tuberculosis Report 2013*. (2013).
5. Bacaër, N., Ouifki, R., Pretorius, C., Wood, R. & Williams, B. Modeling the joint epidemics of TB and HIV in a South African township. *J. Math. Biol.* **57**, 557–93 (2008).
6. Suen, S.-C., Bendavid, E. & Goldhaber-Fiebert, J. D. Disease Control Implications of India’s Changing Multi-Drug Resistant Tuberculosis Epidemic. *PLoS One* **9**, e89822 (2014).
7. Zelner, J. L. *et al.* Bacillus Calmette-Guerin and isoniazid preventative therapy protect contacts of tuberculosis patients. *AJRCCM* 1–33 (2014).
8. Houben, R. M. G. J., Sumner, T., Grant, a. D. & White, R. G. Ability of preventive therapy to cure latent Mycobacterium tuberculosis infection in HIV-infected individuals in high-burden settings. *Proc. Natl. Acad. Sci.* 10–15 (2014). doi:10.1073/pnas.1317660111
9. Selwyn, P. A. *et al.* Clinical Manifestations and Predictors of Disease Progression in Drug Users with Human Immunodeficiency Virus Infection. *N. Engl. J. Med.* **327**, 1697–1703 (1992).
10. Lin, P. L. & Flynn, J. L. Understanding latent tuberculosis: a moving target. *J. Immunol.* **185**, 15–22 (2010).
11. Tiemersma, E. W., van der Werf, M. J., Borgdorff, M. W., Williams, B. G. & Nagelkerke, N. J. D. Natural history of tuberculosis: duration and fatality of untreated pulmonary tuberculosis in HIV negative patients: a systematic review. *PLoS One* **6**, e17601 (2011).
12. Boehme, C. C. *et al.* Feasibility , diagnostic accuracy , and eff ectiveness of decentralised use of the Xpert MTB / RIF test for diagnosis of tuberculosis and multidrug resistance : a multicentre implementation study. *Lancet* **377**, 1495–1505 (2011).
13. Andrews, J. R. *et al.* Risk of progression to active tuberculosis following reinfection with Mycobacterium tuberculosis. *Clin. Infect. Dis.* **54**, 784–791 (2012).
14. Auvert, B. *et al.* Randomized, controlled intervention trial of male circumcision for reduction of HIV infection risk: the ANRS 1265 Trial. *PLoS Med.* **2**, e298 (2005).
15. Mellors, J. W. *et al.* Plasma viral load and CD4+ lymphocytes as prognostic markers of HIV-1 infection. *Ann. Intern. Med.* **126**, 946–54 (1997).
